# Supplementary material
Source: MDPI journal article supplement (https://www.mdpi.com/2306-5729/8/10/151)
Supplement: s1 [file s1]

| NUTS  | ES y/n | Civil Protection Ordinance                                                                                                                                                                                   | Ev1start | Ev1end    | Ev2start  | Ev2end    | Ev3start | Ev3end   | Ev4start | Ev4end | Detail | ES_start | ES_end    | Funds_recei<br>ved | Funds_req_<br>prod | Funds_req_<br>tot |
|-------|--------|--------------------------------------------------------------------------------------------------------------------------------------------------------------------------------------------------------------|----------|-----------|-----------|-----------|----------|----------|----------|--------|--------|----------|-----------|--------------------|--------------------|-------------------|
| ITH51 | 1      | n. 83 del 27 maggio 2013 - n. 130 del 22 novembre 2013 - n. 155 del 26 febbraio 2014 (chiusura) - n. 331 del 4 aprile 2016 - n. 374 del 16 agosto 2016                                                       | 3/5/2013 | 3/10/2013 | 3/17/2013 | 3/18/2013 | 4/7/2013 | 4/8/2013 |          |        | 1      | 5/9/2013 | 2/3/2014  | 14,000,000.00 €    | 11,393,265.92 €    | 275,109,152.64 €  |
| ITH52 | 1      | n. 83 del 27 maggio 2013 - n. 130 del 22 novembre 2013 - n. 155 del 26 febbraio 2014 (chiusura) - n. 331 del 4 aprile 2016 - n. 374 del 16 agosto 2016                                                       | 3/5/2013 | 3/10/2013 | 3/17/2013 | 3/18/2013 | 4/7/2013 | 4/8/2013 |          |        | 1      | 5/9/2013 | 2/4/2014  | 14,000,000.00 €    | 11,393,265.92 €    | 275,109,152.64 €  |
| ITH53 | 1      | n. 83 del 27 maggio 2013 - n. 130 del 22 novembre 2013 - n. 155 del 26 febbraio 2014 (chiusura) - n. 331 del 4 aprile 2016 - n. 374 del 16 agosto 2016                                                       | 3/5/2013 | 3/10/2013 | 3/17/2013 | 3/18/2013 | 4/7/2013 | 4/8/2013 |          |        | 1      | 5/9/2013 | 2/5/2014  | 14,000,000.00 €    | 11,393,265.92 €    | 275,109,152.64 €  |
| ITH54 | 1      | n. 83 del 27 maggio 2013 - n. 130 del 22 novembre 2013 - n. 155 del 26 febbraio 2014 (chiusura) - n. 331 del 4 aprile 2016 - n. 374 del 16 agosto 2016                                                       | 3/5/2013 | 3/10/2013 | 3/17/2013 | 3/18/2013 | 4/7/2013 | 4/8/2013 |          |        | 1      | 5/9/2013 | 2/6/2014  | 14,000,000.00 €    | 11,393,265.92 €    | 275,109,152.64 €  |
| ITH55 | 1      | n. 83 del 27 maggio 2013 - n. 130 del 22 novembre 2013 - n. 155 del 26 febbraio 2014 (chiusura) - n. 331 del 4 aprile 2016 - n. 374 del 16 agosto 2016                                                       | 3/5/2013 | 3/10/2013 | 3/17/2013 | 3/18/2013 | 4/7/2013 | 4/8/2013 |          |        | 1      | 5/9/2013 | 2/7/2014  | 14,000,000.00 €    | 11,393,265.92 €    | 275,109,152.64 €  |
| ITH56 | 1      | n. 83 del 27 maggio 2013 - n. 130 del 22 novembre 2013 - n. 155 del 26 febbraio 2014 (chiusura) - n. 331 del 4 aprile 2016 - n. 374 del 16 agosto 2016                                                       | 3/5/2013 | 3/10/2013 | 3/17/2013 | 3/18/2013 | 4/7/2013 | 4/8/2013 |          |        | 1      | 5/9/2013 | 2/8/2014  | 14,000,000.00 €    | 11,393,265.92 €    | 275,109,152.64 €  |
| ITH57 | 1      | n. 83 del 27 maggio 2013 - n. 130 del 22 novembre 2013 - n. 155 del 26 febbraio 2014 (chiusura) - n. 331 del 4 aprile 2016 - n. 374 del 16 agosto 2016                                                       | 3/5/2013 | 3/10/2013 | 3/17/2013 | 3/18/2013 | 4/7/2013 | 4/8/2013 |          |        | 1      | 5/9/2013 | 2/9/2014  | 14,000,000.00 €    | 11,393,265.92 €    | 275,109,152.64 €  |
| ITH58 | 1      | n. 83 del 27 maggio 2013 - n. 130 del 22 novembre 2013 - n. 155 del 26 febbraio 2014 (chiusura) - n. 331 del 4 aprile 2016 - n. 374 del 16 agosto 2016                                                       | 3/5/2013 | 3/10/2013 | 3/17/2013 | 3/18/2013 | 4/7/2013 | 4/8/2013 |          |        | 1      | 5/9/2013 | 2/10/2014 | 14,000,000.00 €    | 11,393,265.92 €    | 275,109,152.64 €  |
| ITH59 | 1      | n. 83 del 27 maggio 2013 - n. 130 del 22 novembre 2013 - n. 155 del 26 febbraio 2014 (chiusura) - n. 331 del 4 aprile 2016 - n. 374 del 16 agosto 2016                                                       | 3/5/2013 | 3/10/2013 | 3/17/2013 | 3/18/2013 | 4/7/2013 | 4/8/2013 |          |        | 1      | 5/9/2013 | 2/11/2014 | 14,000,000.00 €    | 11,393,265.92 €    | 275,109,152.64 €  |
| ITI11 | 1      | n. 86 del 31 maggio 2013 - n. 101 del 2 luglio 2013 - 126 del 22 novembre 2013 - n. 166 del 7 maggio 2014 (chiusura) - n. 309 del 30 dicembre 2015 - n. 309 del 30 dicembre 2015 - n. 383 del 16 agosto 2016 | 3/5/2013 | 3/19/2013 |           |           |          |          |          |        | 2      | 5/9/2013 | 2/3/2014  | 6,000,000.00 €     | 548,037.86 €       | 93,006,909.15 €   |
| ITI12 | 1      | n. 86 del 31 maggio 2013 - n. 101 del 2 luglio 2013 - 126 del 22 novembre 2013 - n. 166 del 7 maggio 2014 (chiusura) - n. 309 del 30 dicembre 2015 - n. 309 del 30 dicembre 2015 - n. 383 del 16 agosto 2016 | 3/5/2013 | 3/19/2013 |           |           |          |          |          |        | 2      | 5/9/2013 | 2/3/2014  | 6,000,000.00 €     | 548,037.86 €       | 93,006,909.15 €   |
| ITI13 | 1      | n. 86 del 31 maggio 2013 - n. 101 del 2 luglio 2013 - 126 del 22 novembre 2013 - n. 166 del 7 maggio 2014 (chiusura) - n. 309 del 30 dicembre 2015 - n. 309 del 30 dicembre 2015 - n. 383 del 16 agosto 2016 | 3/5/2013 | 3/19/2013 |           |           |          |          |          |        | 2      | 5/9/2013 | 2/3/2014  | 6,000,000.00 €     | 548,037.86 €       | 93,006,909.15 €   |

|       |   |                                                                                                                                                                                |           |           |           |           |   |           |           |                |              |                 |
|-------|---|--------------------------------------------------------------------------------------------------------------------------------------------------------------------------------|-----------|-----------|-----------|-----------|---|-----------|-----------|----------------|--------------|-----------------|
| ITI14 | 1 | n. 86 del 31 maggio 2013 - n. 101 del 2 luglio 2013 - 126 del 22 novembre 2013 - n. 166 del 7 maggio 2014 (chiusura) - n. 309 del 30 dicembre 2015 - n. 383 del 16 agosto 2016 | 3/5/2013  | 3/19/2013 |           |           | 2 | 5/9/2013  | 2/3/2014  | 6,000,000.00 € | 548,037.86 € | 93,006,909.15 € |
| ITI16 | 1 | n. 86 del 31 maggio 2013 - n. 101 del 2 luglio 2013 - 126 del 22 novembre 2013 - n. 166 del 7 maggio 2014 (chiusura) - n. 309 del 30 dicembre 2015 - n. 383 del 16 agosto 2016 | 3/5/2013  | 3/19/2013 |           |           | 2 | 5/9/2013  | 2/3/2014  | 6,000,000.00 € | 548,037.86 € | 93,006,909.15 € |
| ITI17 | 1 | n. 86 del 31 maggio 2013 - n. 101 del 2 luglio 2013 - 126 del 22 novembre 2013 - n. 166 del 7 maggio 2014 (chiusura) - n. 309 del 30 dicembre 2015 - n. 383 del 16 agosto 2016 | 3/5/2013  | 3/19/2013 |           |           | 2 | 5/9/2013  | 2/3/2014  | 6,000,000.00 € | 548,037.86 € | 93,006,909.15 € |
| ITI18 | 1 | n. 86 del 31 maggio 2013 - n. 101 del 2 luglio 2013 - 126 del 22 novembre 2013 - n. 166 del 7 maggio 2014 (chiusura) - n. 309 del 30 dicembre 2015 - n. 383 del 16 agosto 2016 | 3/5/2013  | 3/19/2013 |           |           | 2 | 5/9/2013  | 2/3/2014  | 6,000,000.00 € | 548,037.86 € | 93,006,909.15 € |
| ITI15 | 1 | n. 86 del 31 maggio 2013 - n. 101 del 2 luglio 2013 - 126 del 22 novembre 2013 - n. 166 del 7 maggio 2014 (chiusura) - n. 309 del 30 dicembre 2015 - n. 383 del 16 agosto 2016 | 3/5/2013  | 3/19/2013 |           |           | 2 | 5/9/2013  | 2/3/2014  | 6,000,000.00 € | 548,037.86 € | 93,006,909.15 € |
| ITC20 | 1 | n. 143 del 30 gennaio 2014 - n. 214 del 22 dicembre 2014 - n. 235 del 22 aprile 2015 (chiusura) - n. 404 del 10 novembre 2016                                                  | 4/19/2013 | 4/19/2013 |           |           | 1 | 1/10/2014 | 1/5/2015  | 8,085,000.00 € | N/A          | N/A             |
| ITC11 | 1 | n. 107 del 23 luglio 2013 - n. 128 del 22 novembre 2013 - n. 191 del 17 settembre 2014 (chiusura) - n. 544 del 18 settembre 2018                                               | 4/27/2013 | 5/2/2013  | 5/15/2013 | 5/18/2013 | 1 | 6/26/2013 | 6/21/2014 | 5,000,000.00 € | N/A          | N/A             |
| ITC12 | 1 | n. 107 del 23 luglio 2013 - n. 128 del 22 novembre 2013 - n. 191 del 17 settembre 2014 (chiusura) - n. 544 del 18 settembre 2018                                               | 4/27/2013 | 5/2/2013  | 5/15/2013 | 5/18/2013 | 1 | 6/26/2013 | 6/21/2014 | 5,000,000.00 € | N/A          | N/A             |
| ITC15 | 1 | n. 107 del 23 luglio 2013 - n. 128 del 22 novembre 2013 - n. 191 del 17 settembre 2014 (chiusura) - n. 544 del 18 settembre 2018                                               | 4/27/2013 | 5/2/2013  | 5/15/2013 | 5/18/2013 | 1 | 6/26/2013 | 6/21/2014 | 5,000,000.00 € | N/A          | N/A             |
| ITC16 | 1 | n. 107 del 23 luglio 2013 - n. 128 del 22 novembre 2013 - n. 191 del 17 settembre 2014 (chiusura) - n. 544 del 18 settembre 2018                                               | 4/27/2013 | 5/2/2013  | 5/15/2013 | 5/18/2013 | 1 | 6/26/2013 | 6/21/2014 | 5,000,000.00 € | N/A          | N/A             |
| ITC17 | 1 | n. 107 del 23 luglio 2013 - n. 128 del 22 novembre 2013 - n. 191 del 17 settembre 2014 (chiusura) - n. 544 del 18 settembre 2018                                               | 4/27/2013 | 5/2/2013  | 5/15/2013 | 5/18/2013 | 1 | 6/26/2013 | 6/21/2014 | 5,000,000.00 € | N/A          | N/A             |
| ITC18 | 1 | n. 107 del 23 luglio 2013 - n. 128 del 22 novembre 2013 - n. 191 del 17 settembre 2014 (chiusura) - n. 544 del 18 settembre 2018                                               | 4/27/2013 | 5/2/2013  | 5/15/2013 | 5/18/2013 | 1 | 6/26/2013 | 6/21/2014 | 5,000,000.00 € | N/A          | N/A             |
| ITC13 | 1 | n. 107 del 23 luglio 2013 - n. 128 del 22 novembre 2013 - n. 191 del 17 settembre                                                                                              | 4/27/2013 | 5/2/2013  | 5/15/2013 | 5/18/2013 | 1 | 6/26/2013 | 6/21/2014 | 5,000,000.00 € | N/A          | N/A             |

[illegible]

|       |   |                                                                                                                                                                               |            |            |            |            |           |           |   |            |            |                 |                 |                  |
|-------|---|-------------------------------------------------------------------------------------------------------------------------------------------------------------------------------|------------|------------|------------|------------|-----------|-----------|---|------------|------------|-----------------|-----------------|------------------|
| ITI31 | 1 | n. 141 del 22 gennaio 2014 - n. 222 del 29 gennaio 2015 - n. 243 del 27 aprile 2015 (chiusura) - n. 323 dell'8 marzo 2016 - n. 361 del 21 luglio 2016 - n. 378 del 16/08/2016 | 10/10/2013 | 10/13/2013 | 11/25/2013 | 11/27/2013 | 12/2/2013 | 12/2/2013 | 1 | 1/10/2014  | 1/12/2015  | 20,300,000.00 € | 22,648,041.54 € | 311,516,338.65 € |
| ITI32 | 1 | n. 141 del 22 gennaio 2014 - n. 222 del 29 gennaio 2015 - n. 243 del 27 aprile 2015 (chiusura) - n. 323 dell'8 marzo 2016 - n. 361 del 21 luglio 2016 - n. 378 del 16/08/2016 | 10/10/2013 | 10/13/2013 | 11/25/2013 | 11/27/2013 | 12/2/2013 | 12/2/2013 | 1 | 1/10/2014  | 1/12/2015  | 20,300,000.00 € | 22,648,041.54 € | 311,516,338.65 € |
| ITI33 | 1 | n. 141 del 22 gennaio 2014 - n. 222 del 29 gennaio 2015 - n. 243 del 27 aprile 2015 (chiusura) - n. 323 dell'8 marzo 2016 - n. 361 del 21 luglio 2016 - n. 378 del 16/08/2016 | 10/10/2013 | 10/13/2013 | 11/25/2013 | 11/27/2013 | 12/2/2013 | 12/2/2013 | 1 | 1/10/2014  | 1/12/2015  | 20,300,000.00 € | 22,648,041.54 € | 311,516,338.65 € |
| ITI34 | 1 | n. 141 del 22 gennaio 2014 - n. 222 del 29 gennaio 2015 - n. 243 del 27 aprile 2015 (chiusura) - n. 323 dell'8 marzo 2016 - n. 361 del 21 luglio 2016 - n. 378 del 16/08/2016 | 10/10/2013 | 10/13/2013 | 11/25/2013 | 11/27/2013 | 12/2/2013 | 12/2/2013 | 1 | 1/10/2014  | 1/12/2015  | 20,300,000.00 € | 22,648,041.54 € | 311,516,338.65 € |
| ITI35 | 1 | n. 141 del 22 gennaio 2014 - n. 222 del 29 gennaio 2015 - n. 243 del 27 aprile 2015 (chiusura) - n. 323 dell'8 marzo 2016 - n. 361 del 21 luglio 2016 - n. 378 del 16/08/2016 | 10/10/2013 | 10/13/2013 | 11/25/2013 | 11/27/2013 | 12/2/2013 | 12/2/2013 | 1 | 1/10/2014  | 1/12/2015  | 20,300,000.00 € | 22,648,041.54 € | 311,516,338.65 € |
| ITI11 | 1 | n. 134 del 26 novembre 2013 - n. 211 del 15 dicembre 2014 (chiusura) - n. 218 del 12 gennaio 2015 - n. 362 del 21 luglio 2016 - n. 383 del 16 agosto 2016                     | 10/20/2013 | 10/24/2013 |            |            |           |           | 1 | 11/15/2013 | 11/10/2014 | 16,500,000.00 € | 27,049,447.68 € | 133,534,441.75 € |
| ITI12 | 1 | n. 134 del 26 novembre 2013 - n. 211 del 15 dicembre 2014 (chiusura) - n. 218 del 12 gennaio 2015 - n. 362 del 21 luglio 2016 - n. 383 del 16 agosto 2016                     | 10/20/2013 | 10/24/2013 |            |            |           |           | 1 | 11/15/2013 | 11/10/2014 | 16,500,000.00 € | 27,049,447.68 € | 133,534,441.75 € |
| ITI13 | 1 | n. 134 del 26 novembre 2013 - n. 211 del 15 dicembre 2014 (chiusura) - n. 218 del 12 gennaio 2015 - n. 362 del 21 luglio 2016 - n. 383 del 16 agosto 2016                     | 10/20/2013 | 10/24/2013 |            |            |           |           | 1 | 11/15/2013 | 11/10/2014 | 16,500,000.00 € | 27,049,447.68 € | 133,534,441.75 € |
| ITI14 | 1 | n. 134 del 26 novembre 2013 - n. 211 del 15 dicembre 2014 (chiusura) - n. 218 del 12 gennaio 2015 - n. 362 del 21 luglio 2016 - n. 383 del 16 agosto 2016                     | 10/20/2013 | 10/24/2013 |            |            |           |           | 1 | 11/15/2013 | 11/10/2014 | 16,500,000.00 € | 27,049,447.68 € | 133,534,441.75 € |
| ITI16 | 1 | n. 134 del 26 novembre 2013 - n. 211 del 15 dicembre 2014 (chiusura) - n. 218 del 12 gennaio 2015 - n. 362 del 21 luglio 2016 - n. 383 del 16 agosto 2016                     | 10/20/2013 | 10/24/2013 |            |            |           |           | 1 | 11/15/2013 | 11/10/2014 | 16,500,000.00 € | 27,049,447.68 € | 133,534,441.75 € |
| ITI17 | 1 | n. 134 del 26 novembre 2013 - n. 211 del 15 dicembre 2014 (chiusura) - n. 218 del 12 gennaio 2015 - n. 362 del 21 luglio 2016 - n. 383 del 16 agosto 2016                     | 10/20/2013 | 10/24/2013 |            |            |           |           | 1 | 11/15/2013 | 11/10/2014 | 16,500,000.00 € | 27,049,447.68 € | 133,534,441.75 € |
| ITI18 | 1 | n. 134 del 26 novembre 2013 - n. 211 del 15 dicembre 2014 (chiusura) - n. 218 del 12 gennaio 2015 - n. 362 del 21 luglio 2016 - n. 383 del 16 agosto 2016                     | 10/20/2013 | 10/24/2013 |            |            |           |           | 1 | 11/15/2013 | 11/10/2014 | 16,500,000.00 € | 27,049,447.68 € | 133,534,441.75 € |

|       |   |                                                                                                                                                                                                                                                                                                                     |            |            |            |           |          |          |   |            |            |                 |                 |                  |
|-------|---|---------------------------------------------------------------------------------------------------------------------------------------------------------------------------------------------------------------------------------------------------------------------------------------------------------------------|------------|------------|------------|-----------|----------|----------|---|------------|------------|-----------------|-----------------|------------------|
| ITI19 | 1 | n. 134 del 26 novembre 2013 - n. 211 del 15 dicembre 2014 (chiusura) - n. 218 del 12 gennaio 2015 - n. 362 del 21 luglio 2016 - n. 383 del 16 agosto 2016                                                                                                                                                           | 10/20/2013 | 10/24/2013 |            |           |          |          | 1 | 11/15/2013 | 11/10/2014 | 16,500,000.00 € | 27,049,447.68 € | 133,534,441.75 € |
| ITI1A | 1 | n. 134 del 26 novembre 2013 - n. 211 del 15 dicembre 2014 (chiusura) - n. 218 del 12 gennaio 2015 - n. 362 del 21 luglio 2016 - n. 383 del 16 agosto 2016                                                                                                                                                           | 10/20/2013 | 10/24/2013 |            |           |          |          | 1 | 11/15/2013 | 11/10/2014 | 16,500,000.00 € | 27,049,447.68 € | 133,534,441.75 € |
| ITI15 | 1 | n. 134 del 26 novembre 2013 - n. 211 del 15 dicembre 2014 (chiusura) - n. 218 del 12 gennaio 2015 - n. 362 del 21 luglio 2016 - n. 383 del 16 agosto 2016                                                                                                                                                           | 10/20/2013 | 10/24/2013 |            |           |          |          | 1 | 11/15/2013 | 11/10/2014 | 16,500,000.00 € | 27,049,447.68 € | 133,534,441.75 € |
| ITI21 | 1 | n. 180 del 11 luglio 2014 - n. 267 del 7 luglio 2015 (chiusura) - n. 384 del 16 agosto 2016                                                                                                                                                                                                                         | 11/1/2013  | 2/28/2014  |            |           |          |          | 3 | 6/30/2014  | 6/25/2015  | 3,500,000.00 €  | 6,257,236.45 €  | 111,496,799.60 € |
| ITI22 | 1 | n. 180 del 11 luglio 2014 - n. 267 del 7 luglio 2015 (chiusura) - n. 384 del 16 agosto 2016                                                                                                                                                                                                                         | 11/1/2013  | 2/28/2014  |            |           |          |          | 3 | 6/30/2014  | 6/25/2015  | 3,500,000.00 €  | 6,257,236.45 €  | 111,496,799.60 € |
| ITF12 | 1 | n. 150 del 21 febbraio 2014 - n. 234 del 22 aprile 2015 (chiusura) - n. 356 del 14 luglio 2016 - n. 372 del 16 agosto 2016 - n. 419 del 30 novembre 2016 - n. 471 del 3 agosto 2017                                                                                                                                 | 11/11/2013 | 11/13/2013 | 12/1/2013  | 12/2/2013 |          |          | 1 | 1/24/2014  | 1/19/2015  | 15,000,000.00 € | 21,110,930.00 € | 262,715,210.00 € |
| ITF14 | 1 | n. 150 del 21 febbraio 2014 - n. 234 del 22 aprile 2015 (chiusura) - n. 356 del 14 luglio 2016 - n. 372 del 16 agosto 2016 - n. 419 del 30 novembre 2016 - n. 471 del 3 agosto 2017                                                                                                                                 | 11/11/2013 | 11/13/2013 | 12/1/2013  | 12/2/2013 |          |          | 1 | 1/24/2014  | 1/19/2015  | 15,000,000.00 € | 21,110,930.00 € | 262,715,210.00 € |
| ITF11 | 1 | n. 150 del 21 febbraio 2014 - n. 234 del 22 aprile 2015 (chiusura) - n. 356 del 14 luglio 2016 - n. 372 del 16 agosto 2016 - n. 419 del 30 novembre 2016 - n. 471 del 3 agosto 2017                                                                                                                                 | 11/11/2013 | 11/13/2013 | 12/1/2013  | 12/2/2013 |          |          | 1 | 1/24/2014  | 1/19/2015  | 15,000,000.00 € | 21,110,930.00 € | 262,715,210.00 € |
| ITF13 | 1 | n. 150 del 21 febbraio 2014 - n. 234 del 22 aprile 2015 (chiusura) - n. 356 del 14 luglio 2016 - n. 372 del 16 agosto 2016 - n. 419 del 30 novembre 2016 - n. 471 del 3 agosto 2017                                                                                                                                 | 11/11/2013 | 11/13/2013 | 12/1/2013  | 12/2/2013 |          |          | 1 | 1/24/2014  | 1/19/2015  | 15,000,000.00 € | 21,110,930.00 € | 262,715,210.00 € |
| ITF61 | 1 | n. 185 del 29 luglio 2014 - n. 247 del 07 maggio 2015 (chiusura)                                                                                                                                                                                                                                                    | 11/15/2013 | 11/19/2013 | 11/30/2013 | 12/1/2013 | 2/1/2014 | 2/3/2014 | 1 | 6/30/2014  | 12/27/2014 | 2,400,000.00 €  | N/A             | N/A              |
| ITF63 | 1 | n. 185 del 29 luglio 2014 - n. 247 del 07 maggio 2015 (chiusura)                                                                                                                                                                                                                                                    | 11/15/2013 | 11/19/2013 | 11/30/2013 | 12/1/2013 | 2/1/2014 | 2/3/2014 | 1 | 6/30/2014  | 12/27/2014 | 2,400,000.00 €  | N/A             | N/A              |
| ITF65 | 1 | n. 185 del 29 luglio 2014 - n. 247 del 07 maggio 2015 (chiusura)                                                                                                                                                                                                                                                    | 11/15/2013 | 11/19/2013 | 11/30/2013 | 12/1/2013 | 2/1/2014 | 2/3/2014 | 1 | 6/30/2014  | 12/27/2014 | 2,400,000.00 €  | N/A             | N/A              |
| ITF62 | 1 | n. 185 del 29 luglio 2014 - n. 247 del 07 maggio 2015 (chiusura)                                                                                                                                                                                                                                                    | 11/15/2013 | 11/19/2013 | 11/30/2013 | 12/1/2013 | 2/1/2014 | 2/3/2014 | 1 | 6/30/2014  | 12/27/2014 | 2,400,000.00 €  | N/A             | N/A              |
| ITF64 | 1 | n. 185 del 29 luglio 2014 - n. 247 del 07 maggio 2015 (chiusura)                                                                                                                                                                                                                                                    | 11/15/2013 | 11/19/2013 | 11/30/2013 | 12/1/2013 | 2/1/2014 | 2/3/2014 | 1 | 6/30/2014  | 12/27/2014 | 2,400,000.00 €  | N/A             | N/A              |
| ITG2F | 1 | n. 122 del 20 novembre 2013 - n. 137 del 13 dicembre 2013 - n. 144 del 6 febbraio 2014 - n. 152 del 26 febbraio 2014 - n. 164 dell'11 aprile 2014 - n. 210 del 2 dicembre 2014 (chiusura) - n. 352 del 27 giugno 2016 - n. 366 dell'8 agosto 2016 - n. 381 del 16 agosto 2016 - n. 447 del 18 aprile 2017 (subentro | 11/18/2013 | 11/19/2013 |            |           |          |          | 1 | 11/19/2013 | 11/13/2014 | 29,810,000.00 € | 44,258,165.69 € | 579,340,232.81 € |

|       |   |                                                                                                                                                                                                                                                                                                                                                                              |            |            |            |            |            |                 |                 |                  |                |                    |
|-------|---|------------------------------------------------------------------------------------------------------------------------------------------------------------------------------------------------------------------------------------------------------------------------------------------------------------------------------------------------------------------------------|------------|------------|------------|------------|------------|-----------------|-----------------|------------------|----------------|--------------------|
| ITG2E | 1 | Commissario delegato ANAS) - n. 505 del 12 febbraio 2018                                                                                                                                                                                                                                                                                                                     | 11/18/2013 | 11/19/2013 | 1          | 11/19/2013 | 11/13/2014 | 29,810,000.00 € | 44,258,165.69 € | 579,340,232.81 € |                |                    |
|       |   | n. 122 del 20 novembre 2013 - n. 137 del 13 dicembre 2013 - n. 144 del 6 febbraio 2014 - n. 152 del 26 febbraio 2014 - n. 164 dell'11 aprile 2014 - n. 210 del 2 dicembre 2014 (chiusura) - n. 352 del 27 giugno 2016 - n. 366 dell'8 agosto 2016 - n. 381 del 16 agosto 2016 - n. 447 del 18 aprile 2017 (subentro Commissario delegato ANAS) - n. 505 del 12 febbraio 2018 |            |            |            |            |            |                 |                 |                  |                |                    |
| ITG2G | 1 | n. 122 del 20 novembre 2013 - n. 137 del 13 dicembre 2013 - n. 144 del 6 febbraio 2014 - n. 152 del 26 febbraio 2014 - n. 164 dell'11 aprile 2014 - n. 210 del 2 dicembre 2014 (chiusura) - n. 352 del 27 giugno 2016 - n. 366 dell'8 agosto 2016 - n. 381 del 16 agosto 2016 - n. 447 del 18 aprile 2017 (subentro Commissario delegato ANAS) - n. 505 del 12 febbraio 2018 | 11/18/2013 | 11/19/2013 | 1          | 11/19/2013 | 11/13/2014 | 29,810,000.00 € | 44,258,165.69 € | 579,340,232.81 € |                |                    |
|       |   | n. 122 del 20 novembre 2013 - n. 137 del 13 dicembre 2013 - n. 144 del 6 febbraio 2014 - n. 152 del 26 febbraio 2014 - n. 164 dell'11 aprile 2014 - n. 210 del 2 dicembre 2014 (chiusura) - n. 352 del 27 giugno 2016 - n. 366 dell'8 agosto 2016 - n. 381 del 16 agosto 2016 - n. 447 del 18 aprile 2017 (subentro Commissario delegato ANAS) - n. 505 del 12 febbraio 2018 |            |            |            |            |            |                 |                 |                  |                |                    |
| ITG2D | 1 | n. 122 del 20 novembre 2013 - n. 137 del 13 dicembre 2013 - n. 144 del 6 febbraio 2014 - n. 152 del 26 febbraio 2014 - n. 164 dell'11 aprile 2014 - n. 210 del 2 dicembre 2014 (chiusura) - n. 352 del 27 giugno 2016 - n. 366 dell'8 agosto 2016 - n. 381 del 16 agosto 2016 - n. 447 del 18 aprile 2017 (subentro Commissario delegato ANAS) - n. 505 del 12 febbraio 2018 | 11/18/2013 | 11/19/2013 | 1          | 11/19/2013 | 11/13/2014 | 29,810,000.00 € | 44,258,165.69 € | 579,340,232.81 € |                |                    |
|       |   | n. 122 del 20 novembre 2013 - n. 137 del 13 dicembre 2013 - n. 144 del 6 febbraio 2014 - n. 152 del 26 febbraio 2014 - n. 164 dell'11 aprile 2014 - n. 210 del 2 dicembre 2014 (chiusura) - n. 352 del 27 giugno 2016 - n. 366 dell'8 agosto 2016 - n. 381 del 16 agosto 2016 - n. 447 del 18 aprile 2017 (subentro Commissario delegato ANAS) - n. 505 del 12 febbraio 2018 |            |            |            |            |            |                 |                 |                  |                |                    |
| ITG2H | 1 | n. 122 del 20 novembre 2013 - n. 137 del 13 dicembre 2013 - n. 144 del 6 febbraio 2014 - n. 152 del 26 febbraio 2014 - n. 164 dell'11 aprile 2014 - n. 210 del 2 dicembre 2014 (chiusura) - n. 352 del 27 giugno 2016 - n. 366 dell'8 agosto 2016 - n. 381 del 16 agosto 2016 - n. 447 del 18 aprile 2017 (subentro Commissario delegato ANAS) - n. 505 del 12 febbraio 2018 | 11/18/2013 | 11/19/2013 | 1          | 11/19/2013 | 11/13/2014 | 29,810,000.00 € | 44,258,165.69 € | 579,340,232.81 € |                |                    |
|       |   | n. 122 del 20 novembre 2013 - n. 137 del 13 dicembre 2013 - n. 144 del 6 febbraio 2014 - n. 152 del 26 febbraio 2014 - n. 164 dell'11 aprile 2014 - n. 210 del 2 dicembre 2014 (chiusura) - n. 352 del 27 giugno 2016 - n. 366 dell'8 agosto 2016 - n. 381 del 16 agosto 2016 - n. 447 del 18 aprile 2017 (subentro Commissario delegato ANAS) - n. 505 del 12 febbraio 2018 |            |            |            |            |            |                 |                 |                  |                |                    |
| ITF46 | 1 | n. 173 dell'8 luglio 2014 - n. 273 del 28 luglio 2015 (chiusura) - n. 386 del 16 agosto 2016 - n. 520 del 31 maggio 2018                                                                                                                                                                                                                                                     | 11/19/2013 | 11/19/2013 | 11/30/2013 | 12/3/2013  | 1          | 6/30/2014       | 6/25/2015       | 9,000,000.00 €   | 3,801,154.00 € | 0.235,171,361.00 € |
| ITF47 | 0 | n. 173 dell'8 luglio 2014 - n. 273 del 28 luglio 2015 (chiusura) - n. 386 del 16 agosto 2016 - n. 520 del 31 maggio 2018                                                                                                                                                                                                                                                     | 11/19/2013 | 11/19/2013 | 11/30/2013 | 12/3/2013  | 1          | 6/30/2014       | 6/25/2015       | 9,000,000.00 €   | 3,801,154.00 € | 0.235,171,361.00 € |
| ITF44 | 0 | n. 173 dell'8 luglio 2014 - n. 273 del 28 luglio 2015 (chiusura) - n. 386 del 16 agosto 2016 - n. 520 del 31 maggio 2018                                                                                                                                                                                                                                                     | 11/19/2013 | 11/19/2013 | 11/30/2013 | 12/3/2013  | 1          | 6/30/2014       | 6/25/2015       | 9,000,000.00 €   | 3,801,154.00 € | 0.235,171,361.00 € |
| ITF43 | 1 | n. 173 dell'8 luglio 2014 - n. 273 del 28 luglio 2015 (chiusura) - n. 386 del 16 agosto 2016 - n. 520 del 31 maggio 2018                                                                                                                                                                                                                                                     | 11/19/2013 | 11/19/2013 | 11/30/2013 | 12/3/2013  | 1          | 6/30/2014       | 6/25/2015       | 9,000,000.00 €   | 3,801,154.00 € | 0.235,171,361.00 € |
| ITF45 | 1 | n. 173 dell'8 luglio 2014 - n. 273 del 28 luglio 2015 (chiusura) - n. 386 del 16 agosto 2016 - n. 520 del 31 maggio 2018                                                                                                                                                                                                                                                     | 11/19/2013 | 11/19/2013 | 11/30/2013 | 12/3/2013  | 1          | 6/30/2014       | 6/25/2015       | 9,000,000.00 €   | 3,801,154.00 € | 0.235,171,361.00 € |

|       |   |                                                                                                                                                                                                                   |            |            |           |           |           |           |   |           |           |                 |                 |                  |
|-------|---|-------------------------------------------------------------------------------------------------------------------------------------------------------------------------------------------------------------------|------------|------------|-----------|-----------|-----------|-----------|---|-----------|-----------|-----------------|-----------------|------------------|
| ITF51 | 1 | n. 151 del 21 febbraio 2014 - n. 242 del 23 aprile 2015 (chiusura) - n. 387 del 16 agosto 2016 - n. 451 del 4 maggio 2017                                                                                         | 12/1/2013  | 12/3/2013  |           |           |           |           | 1 | 1/24/2014 | 1/19/2015 | 14,000,000.00 € | 24,900,677.24 € | 134,517,703.88 € |
| ITF52 | 1 | n. 151 del 21 febbraio 2014 - n. 242 del 23 aprile 2015 (chiusura) - n. 387 del 16 agosto 2016 - n. 451 del 4 maggio 2017                                                                                         | 12/1/2013  | 12/3/2013  |           |           |           |           | 1 | 1/24/2014 | 1/19/2015 | 14,000,000.00 € | 24,900,677.24 € | 134,517,703.88 € |
| ITH55 | 1 | n. 174 del 9 luglio 2014 - n. 270 del 27 luglio 2015 (chiusura) - n. 374 del 16 agosto 2016 - n. 470 del 26 luglio 2017                                                                                           | 12/20/2013 | 3/31/2014  |           |           |           |           | 3 | 6/30/2014 | 6/25/2015 | 9,700,000.00 €  | 1,239,297.44 €  | 126,079,713.61 € |
| ITH58 | 1 | n. 174 del 9 luglio 2014 - n. 270 del 27 luglio 2015 (chiusura) - n. 374 del 16 agosto 2016 - n. 470 del 26 luglio 2017                                                                                           | 12/20/2013 | 3/31/2014  |           |           |           |           | 3 | 6/30/2014 | 6/25/2015 | 9,700,000.00 €  | 1,239,297.44 €  | 126,079,713.61 € |
| ITH54 | 1 | n. 174 del 9 luglio 2014 - n. 270 del 27 luglio 2015 (chiusura) - n. 374 del 16 agosto 2016 - n. 470 del 26 luglio 2017                                                                                           | 12/20/2013 | 3/31/2014  |           |           |           |           | 3 | 6/30/2014 | 6/25/2015 | 9,700,000.00 €  | 1,239,297.44 €  | 126,079,713.61 € |
| ITH51 | 1 | n. 174 del 9 luglio 2014 - n. 270 del 27 luglio 2015 (chiusura) - n. 374 del 16 agosto 2016 - n. 470 del 26 luglio 2017                                                                                           | 12/20/2013 | 3/31/2014  |           |           |           |           | 3 | 6/30/2014 | 6/25/2015 | 9,700,000.00 €  | 1,239,297.44 €  | 126,079,713.61 € |
| ITH52 | 1 | n. 174 del 9 luglio 2014 - n. 270 del 27 luglio 2015 (chiusura) - n. 374 del 16 agosto 2016 - n. 470 del 26 luglio 2017                                                                                           | 12/20/2013 | 3/31/2014  |           |           |           |           | 3 | 6/30/2014 | 6/25/2015 | 9,700,000.00 €  | 1,239,297.44 €  | 126,079,713.61 € |
| ITH53 | 1 | n. 174 del 9 luglio 2014 - n. 270 del 27 luglio 2015 (chiusura) - n. 374 del 16 agosto 2016 - n. 470 del 26 luglio 2017                                                                                           | 12/20/2013 | 3/31/2014  |           |           |           |           | 3 | 6/30/2014 | 6/25/2015 | 9,700,000.00 €  | 1,239,297.44 €  | 126,079,713.61 € |
| ITH59 | 1 | n. 174 del 9 luglio 2014 - n. 270 del 27 luglio 2015 (chiusura) - n. 374 del 16 agosto 2016 - n. 470 del 26 luglio 2017                                                                                           | 12/20/2013 | 3/31/2014  |           |           |           |           | 3 | 6/30/2014 | 6/25/2015 | 9,700,000.00 €  | 1,239,297.44 €  | 126,079,713.61 € |
| ITC18 | 1 | n. 181 del 11 luglio 2014 - n. 305 del 16 dicembre 2015 (chiusura) - n. 544 del 18 settembre 2018                                                                                                                 | 12/25/2013 | 12/26/2013 | 1/17/2014 | 1/19/2014 | 2/1/2014  | 3/10/2014 | 2 | 6/30/2014 | 6/25/2015 | 3,700,000.00 €  | N/A             | N/A              |
| ITC17 | 1 | n. 181 del 11 luglio 2014 - n. 305 del 16 dicembre 2015 (chiusura) - n. 544 del 18 settembre 2018                                                                                                                 | 12/25/2013 | 12/26/2013 | 1/17/2014 | 1/19/2014 | 2/1/2014  | 3/10/2014 | 2 | 6/30/2014 | 6/25/2015 | 3,700,000.00 €  | N/A             | N/A              |
| ITC16 | 1 | n. 181 del 11 luglio 2014 - n. 305 del 16 dicembre 2015 (chiusura) - n. 544 del 18 settembre 2018                                                                                                                 | 12/25/2013 | 12/26/2013 | 1/17/2014 | 1/19/2014 | 2/1/2014  | 3/10/2014 | 2 | 6/30/2014 | 6/25/2015 | 3,700,000.00 €  | N/A             | N/A              |
| ITC15 | 1 | n. 181 del 11 luglio 2014 - n. 305 del 16 dicembre 2015 (chiusura) - n. 544 del 18 settembre 2018                                                                                                                 | 12/25/2013 | 12/26/2013 | 1/17/2014 | 1/19/2014 | 2/1/2014  | 3/10/2014 | 2 | 6/30/2014 | 6/25/2015 | 3,700,000.00 €  | N/A             | N/A              |
| ITC14 | 0 | n. 181 del 11 luglio 2014 - n. 305 del 16 dicembre 2015 (chiusura) - n. 544 del 18 settembre 2018                                                                                                                 | 12/25/2013 | 12/26/2013 | 1/17/2014 | 1/19/2014 | 2/1/2014  | 3/10/2014 | 2 | 6/30/2014 | 6/25/2015 | 3,700,000.00 €  | N/A             | N/A              |
| ITC11 | 1 | n. 181 del 11 luglio 2014 - n. 305 del 16 dicembre 2015 (chiusura) - n. 544 del 18 settembre 2018                                                                                                                 | 12/25/2013 | 12/26/2013 | 1/17/2014 | 1/19/2014 | 2/1/2014  | 3/10/2014 | 2 | 6/30/2014 | 6/25/2015 | 3,700,000.00 €  | N/A             | N/A              |
| ITC12 | 1 | n. 181 del 11 luglio 2014 - n. 305 del 16 dicembre 2015 (chiusura) - n. 544 del 18 settembre 2018                                                                                                                 | 12/25/2013 | 12/26/2013 | 1/17/2014 | 1/19/2014 | 2/1/2014  | 3/10/2014 | 2 | 6/30/2014 | 6/25/2015 | 3,700,000.00 €  | N/A             | N/A              |
| ITC31 | 1 | n. 149 del 21 febbraio 2014 - n.187 del 19 agosto 2014 - n. 207 del 24 novembre 2014 (chiusura) - n. 277 del 13 agosto 2015 - n. 354 dell'11 luglio 2016 - n. 371 dell'11 agosto 2016 - n. 376 del 16 agosto 2016 | 12/25/2013 | 12/26/2013 | 1/4/2014  | 1/5/2014  | 1/16/2014 | 1/20/2014 | 1 | 1/31/2014 | 7/30/2014 | 13,000,000.00 € | 7,543,365.00 €  | 203,601,200.15 € |

[illegible]



[illegible]

10

|       |   |                                                                                                                                                                                                                                               |           |            |           |           |            |            |   |            |            |                 |                 |                  |
|-------|---|-----------------------------------------------------------------------------------------------------------------------------------------------------------------------------------------------------------------------------------------------|-----------|------------|-----------|-----------|------------|------------|---|------------|------------|-----------------|-----------------|------------------|
| ITF46 | 1 | n. 200 del 7 novembre 2014 - n. 301 del 25 novembre 2015 (chiusura) - n. 386 del 16 agosto 2016 - n. 521 del 31 maggio 2018                                                                                                                   | 9/1/2014  | 9/6/2014   |           |           |            |            | 1 | 10/23/2014 | 10/18/2015 | 10,500,000.00 € | 5,851,670.00 €  | 202,794,511.00 € |
| ITI14 | 1 | n. 201 del 11 novembre 2014 - n. 307 del 30 dicembre 2015 - n. 307 del 30 dicembre 2015 (chiusura) - n. 383 del 16 agosto 2016 - n. 440 del 3 marzo 2017 -                                                                                    | 9/19/2014 | 9/20/2014  |           |           |            |            | 1 | 10/23/2014 | 10/18/2015 | 3,248,000.00 €  | 19,935,662.00 € | 54,294,414.00 €  |
| ITI12 | 1 | n. 201 del 11 novembre 2014 - n. 307 del 30 dicembre 2015 - n. 307 del 30 dicembre 2015 (chiusura) - n. 383 del 16 agosto 2016 - n. 440 del 3 marzo 2017 -                                                                                    | 9/19/2014 | 9/20/2014  |           |           |            |            | 1 | 10/23/2014 | 10/18/2015 | 3,248,000.00 €  | 19,935,662.00 € | 54,294,414.00 €  |
| ITI17 | 1 | n. 201 del 11 novembre 2014 - n. 307 del 30 dicembre 2015 - n. 307 del 30 dicembre 2015 (chiusura) - n. 383 del 16 agosto 2016 - n. 440 del 3 marzo 2017 -                                                                                    | 9/19/2014 | 9/20/2014  |           |           |            |            | 1 | 10/23/2014 | 10/18/2015 | 3,248,000.00 €  | 19,935,662.00 € | 54,294,414.00 €  |
| ITI13 | 1 | n. 201 del 11 novembre 2014 - n. 307 del 30 dicembre 2015 - n. 307 del 30 dicembre 2015 (chiusura) - n. 383 del 16 agosto 2016 - n. 440 del 3 marzo 2017 -                                                                                    | 9/19/2014 | 9/20/2014  |           |           |            |            | 1 | 10/23/2014 | 10/18/2015 | 3,248,000.00 €  | 19,935,662.00 € | 54,294,414.00 €  |
| ITI15 | 1 | n. 201 del 11 novembre 2014 - n. 307 del 30 dicembre 2015 - n. 307 del 30 dicembre 2015 (chiusura) - n. 383 del 16 agosto 2016 - n. 440 del 3 marzo 2017 -                                                                                    | 9/19/2014 | 9/20/2014  |           |           |            |            | 1 | 10/23/2014 | 10/18/2015 | 3,248,000.00 €  | 19,935,662.00 € | 54,294,414.00 €  |
| ITC33 | 1 | n. 203 del 14 novembre 2014 - n. 224 del 10 febbraio 2015 - n. 252 del 14 maggio 2015 - n. 304 del 14 dicembre 2015 (chiusura) - n. 349 del 3 giugno 2016 - n. 376 del 16 agosto 2016 - n. 398 del 3 ottobre 2016 - n. 456 del 29 maggio 2017 | 10/9/2014 | 10/13/2014 |           |           |            |            | 1 | 10/30/2014 | 10/25/2015 | 12,580,000.00 € | 74,044,220.00 € | 158,768,215.00 € |
| ITC34 | 1 | n. 203 del 14 novembre 2014 - n. 224 del 10 febbraio 2015 - n. 252 del 14 maggio 2015 - n. 304 del 14 dicembre 2015 (chiusura) - n. 349 del 3 giugno 2016 - n. 376 del 16 agosto 2016 - n. 398 del 3 ottobre 2016 - n. 456 del 29 maggio 2017 | 10/9/2014 | 10/13/2014 |           |           |            |            | 1 | 10/30/2014 | 10/25/2015 | 12,580,000.00 € | 74,044,220.00 € | 158,768,215.00 € |
| ITC32 | 0 | n. 203 del 14 novembre 2014 - n. 224 del 10 febbraio 2015 - n. 252 del 14 maggio 2015 - n. 304 del 14 dicembre 2015 (chiusura) - n. 349 del 3 giugno 2016 - n. 376 del 16 agosto 2016 - n. 398 del 3 ottobre 2016 - n. 456 del 29 maggio 2017 | 10/9/2014 | 10/13/2014 |           |           |            |            | 1 | 10/30/2014 | 10/25/2015 | 12,580,000.00 € | 74,044,220.00 € | 158,768,215.00 € |
| ITC18 | 1 | n. 181 del 11 luglio 2014 - n. 305 del 16 dicembre 2015 (chiusura) - n. 544 del 18 settembre 2018                                                                                                                                             | 10/9/2014 | 10/14/2014 | 11/4/2014 | 11/5/2014 | 11/11/2014 | 11/15/2014 | 1 | 12/12/2014 | 12/7/2015  | 31,250,000.00 € | 26,521,230.00 € | 155,664,615.00 € |
| ITC13 | 1 | n. 181 del 11 luglio 2014 - n. 305 del 16 dicembre 2015 (chiusura) - n. 544 del 18 settembre 2018                                                                                                                                             | 10/9/2014 | 10/14/2014 | 11/4/2014 | 11/5/2014 | 11/11/2014 | 11/15/2014 | 1 | 12/12/2014 | 12/7/2015  | 31,250,000.00 € | 26,521,230.00 € | 155,664,615.00 € |
| ITC15 | 1 | n. 181 del 11 luglio 2014 - n. 305 del 16 dicembre 2015 (chiusura) - n. 544 del 18 settembre 2018                                                                                                                                             | 10/9/2014 | 10/14/2014 | 11/4/2014 | 11/5/2014 | 11/11/2014 | 11/15/2014 | 1 | 12/12/2014 | 12/7/2015  | 31,250,000.00 € | 26,521,230.00 € | 155,664,615.00 € |
| ITC11 | 1 | n. 181 del 11 luglio 2014 - n. 305 del 16 dicembre 2015 (chiusura) - n. 544 del 18 settembre 2018                                                                                                                                             | 10/9/2014 | 10/14/2014 | 11/4/2014 | 11/5/2014 | 11/11/2014 | 11/15/2014 | 1 | 12/12/2014 | 12/7/2015  | 31,250,000.00 € | 26,521,230.00 € | 155,664,615.00 € |

|       |   |                                                                                                                                                                             |            |            |           |           |            |            |   |            |            |                 |                 |                  |
|-------|---|-----------------------------------------------------------------------------------------------------------------------------------------------------------------------------|------------|------------|-----------|-----------|------------|------------|---|------------|------------|-----------------|-----------------|------------------|
| ITC14 | 1 | n. 181 del 11 luglio 2014 - n. 305 del 16 dicembre 2015 (chiusura) - n. 544 del 18 settembre 2018                                                                           | 10/9/2014  | 10/14/2014 | 11/4/2014 | 11/5/2014 | 11/11/2014 | 11/15/2014 | 1 | 12/12/2014 | 12/7/2015  | 31,250,000.00 € | 26,521,230.00 € | 155,664,615.00 € |
| ITC12 | 1 | n. 181 del 11 luglio 2014 - n. 305 del 16 dicembre 2015 (chiusura) - n. 544 del 18 settembre 2018                                                                           | 10/9/2014  | 10/14/2014 | 11/4/2014 | 11/5/2014 | 11/11/2014 | 11/15/2014 | 1 | 12/12/2014 | 12/7/2015  | 31,250,000.00 € | 26,521,230.00 € | 155,664,615.00 € |
| ITI12 | 1 | n. 215 del 24 dicembre 2014 - n. 266 del 3 luglio 2015 - n. 346 del 13 maggio 2016 - n. 368 del 10 agosto 2016 (chiusura) - n. 383 del 16 agosto 2016                       | 10/10/2014 | 10/14/2014 |           |           |            |            | 1 | 12/17/2014 | 12/12/2015 | 21,971,000.00 € | 23,823,471.00 € | 65,562,049.00 €  |
| ITI11 | 1 | n. 215 del 24 dicembre 2014 - n. 266 del 3 luglio 2015 - n. 346 del 13 maggio 2016 - n. 368 del 10 agosto 2016 (chiusura) - n. 383 del 16 agosto 2016                       | 10/10/2014 | 10/14/2014 |           |           |            |            | 1 | 12/17/2014 | 12/12/2015 | 21,971,000.00 € | 23,823,471.00 € | 65,562,049.00 €  |
| ITI1A | 1 | n. 215 del 24 dicembre 2014 - n. 266 del 3 luglio 2015 - n. 346 del 13 maggio 2016 - n. 368 del 10 agosto 2016 (chiusura) - n. 383 del 16 agosto 2016                       | 10/10/2014 | 10/14/2014 |           |           |            |            | 1 | 12/17/2014 | 12/12/2015 | 21,971,000.00 € | 23,823,471.00 € | 65,562,049.00 €  |
| ITI17 | 1 | n. 215 del 24 dicembre 2014 - n. 266 del 3 luglio 2015 - n. 346 del 13 maggio 2016 - n. 368 del 10 agosto 2016 (chiusura) - n. 383 del 16 agosto 2016                       | 10/10/2014 | 10/14/2014 |           |           |            |            | 1 | 12/17/2014 | 12/12/2015 | 21,971,000.00 € | 23,823,471.00 € | 65,562,049.00 €  |
| ITI16 | 1 | n. 215 del 24 dicembre 2014 - n. 266 del 3 luglio 2015 - n. 346 del 13 maggio 2016 - n. 368 del 10 agosto 2016 (chiusura) - n. 383 del 16 agosto 2016                       | 10/10/2014 | 10/14/2014 |           |           |            |            | 1 | 12/17/2014 | 12/12/2015 | 21,971,000.00 € | 23,823,471.00 € | 65,562,049.00 €  |
| ITI13 | 0 | n. 215 del 24 dicembre 2014 - n. 266 del 3 luglio 2015 - n. 346 del 13 maggio 2016 - n. 368 del 10 agosto 2016 (chiusura) - n. 383 del 16 agosto 2016                       | 10/10/2014 | 10/14/2014 |           |           |            |            | 1 | 12/17/2014 | 12/12/2015 | 21,971,000.00 € | 23,823,471.00 € | 65,562,049.00 €  |
| ITH51 | 1 | n. 202 del 14 novembre 2014 - n. 308 del 30 dicembre 2015 - n.308 del 30 dicembre 2015 (chiusura) - n. 374 del 16 agosto 2016 - n. 501 del 25 gennaio 2018                  | 10/13/2014 | 10/14/2014 |           |           |            |            | 1 | 10/30/2014 | 10/25/2015 | 13,910,000.00 € | 21,499,715.00 € | 100,694,123.00 € |
| ITH52 | 1 | n. 202 del 14 novembre 2014 - n. 308 del 30 dicembre 2015 - n.308 del 30 dicembre 2015 (chiusura) - n. 374 del 16 agosto 2016 - n. 501 del 25 gennaio 2018                  | 10/13/2014 | 10/14/2014 |           |           |            |            | 1 | 10/30/2014 | 10/25/2015 | 13,910,000.00 € | 21,499,715.00 € | 100,694,123.00 € |
| ITC31 | 1 | n. 216 del 30 dicembre 2014 - n. 224 del 10 febbraio 2015 - n. 321 dell'11 febbraio 2016 - n. 349 del 3 giugno 2016 - n. 376 del 16 agosto 2016 - n. 469 del 21 luglio 2017 | 11/3/2014  | 11/18/2014 |           |           |            |            | 1 | 12/24/2014 | 12/19/2015 | 35,000,000.00 € | 16,756,745.00 € | 283,897,443.00 € |
| ITC32 | 1 | n. 216 del 30 dicembre 2014 - n. 224 del 10 febbraio 2015 - n. 321 dell'11 febbraio 2016 - n. 349 del 3 giugno 2016 - n. 376 del 16 agosto 2016 - n. 469 del 21 luglio 2017 | 11/3/2014  | 11/18/2014 |           |           |            |            | 1 | 12/24/2014 | 12/19/2015 | 35,000,000.00 € | 16,756,745.00 € | 283,897,443.00 € |
| ITC33 | 1 | n. 216 del 30 dicembre 2014 - n. 224 del 10 febbraio 2015 - n. 321 dell'11 febbraio 2016 - n. 349 del 3 giugno 2016 - n. 376 del 16 agosto 2016 - n. 469 del 21 luglio 2017 | 11/3/2014  | 11/18/2014 |           |           |            |            | 1 | 12/24/2014 | 12/19/2015 | 35,000,000.00 € | 16,756,745.00 € | 283,897,443.00 € |
| ITC34 | 1 | n. 216 del 30 dicembre 2014 - n. 224 del 10 febbraio 2015 - n. 321 dell'11 febbraio 2016 - n. 349 del 3 giugno 2016 - n. 376 del 16 agosto 2016 - n. 469 del 21 luglio 2017 | 11/3/2014  | 11/18/2014 |           |           |            |            | 1 | 12/24/2014 | 12/19/2015 | 35,000,000.00 € | 16,756,745.00 € | 283,897,443.00 € |

|       |   |                                                                                                                                                             |            |            |           |           |   |           |          |                |                 |                 |
|-------|---|-------------------------------------------------------------------------------------------------------------------------------------------------------------|------------|------------|-----------|-----------|---|-----------|----------|----------------|-----------------|-----------------|
| ITC41 | 1 | n. 226 del 3 marzo 2015 - n. 312 del 31 dicembre 2015 - n. 327 del 22 marzo 2016 - n. 348 del 3 giugno 2016 - n. 377 del 16 agosto 2016                     | 11/11/2014 | 11/22/2014 |           |           | 1 | 2/10/2015 | 2/5/2016 | 9,000,000.00 € | 13,026,772.00 € | 54,044,448.00 € |
| ITC42 | 1 | n. 226 del 3 marzo 2015 - n. 312 del 31 dicembre 2015 - n. 327 del 22 marzo 2016 - n. 348 del 3 giugno 2016 - n. 377 del 16 agosto 2016                     | 11/11/2014 | 11/22/2014 |           |           | 1 | 2/10/2015 | 2/5/2016 | 9,000,000.00 € | 13,026,772.00 € | 54,044,448.00 € |
| ITC44 | 1 | n. 226 del 3 marzo 2015 - n. 312 del 31 dicembre 2015 - n. 327 del 22 marzo 2016 - n. 348 del 3 giugno 2016 - n. 377 del 16 agosto 2016                     | 11/11/2014 | 11/22/2014 |           |           | 1 | 2/10/2015 | 2/5/2016 | 9,000,000.00 € | 13,026,772.00 € | 54,044,448.00 € |
| ITC4C | 1 | n. 226 del 3 marzo 2015 - n. 312 del 31 dicembre 2015 - n. 327 del 22 marzo 2016 - n. 348 del 3 giugno 2016 - n. 377 del 16 agosto 2016                     | 11/11/2014 | 11/22/2014 |           |           | 1 | 2/10/2015 | 2/5/2016 | 9,000,000.00 € | 13,026,772.00 € | 54,044,448.00 € |
| ITC46 | 1 | n. 226 del 3 marzo 2015 - n. 312 del 31 dicembre 2015 - n. 327 del 22 marzo 2016 - n. 348 del 3 giugno 2016 - n. 377 del 16 agosto 2016                     | 11/11/2014 | 11/22/2014 |           |           | 1 | 2/10/2015 | 2/5/2016 | 9,000,000.00 € | 13,026,772.00 € | 54,044,448.00 € |
| ITC47 | 1 | n. 226 del 3 marzo 2015 - n. 312 del 31 dicembre 2015 - n. 327 del 22 marzo 2016 - n. 348 del 3 giugno 2016 - n. 377 del 16 agosto 2016                     | 11/11/2014 | 11/22/2014 |           |           | 1 | 2/10/2015 | 2/5/2016 | 9,000,000.00 € | 13,026,772.00 € | 54,044,448.00 € |
| ITC48 | 1 | n. 226 del 3 marzo 2015 - n. 312 del 31 dicembre 2015 - n. 327 del 22 marzo 2016 - n. 348 del 3 giugno 2016 - n. 377 del 16 agosto 2016                     | 11/11/2014 | 11/22/2014 |           |           | 1 | 2/10/2015 | 2/5/2016 | 9,000,000.00 € | 13,026,772.00 € | 54,044,448.00 € |
| ITC4A | 1 | n. 226 del 3 marzo 2015 - n. 312 del 31 dicembre 2015 - n. 327 del 22 marzo 2016 - n. 348 del 3 giugno 2016 - n. 377 del 16 agosto 2016                     | 11/11/2014 | 11/22/2014 |           |           | 1 | 2/10/2015 | 2/5/2016 | 9,000,000.00 € | 13,026,772.00 € | 54,044,448.00 € |
| ITC4B | 1 | n. 226 del 3 marzo 2015 - n. 312 del 31 dicembre 2015 - n. 327 del 22 marzo 2016 - n. 348 del 3 giugno 2016 - n. 377 del 16 agosto 2016                     | 11/11/2014 | 11/22/2014 |           |           | 1 | 2/10/2015 | 2/5/2016 | 9,000,000.00 € | 13,026,772.00 € | 54,044,448.00 € |
| ITC43 | 1 | n. 226 del 3 marzo 2015 - n. 312 del 31 dicembre 2015 - n. 327 del 22 marzo 2016 - n. 348 del 3 giugno 2016 - n. 377 del 16 agosto 2016                     | 11/11/2014 | 11/22/2014 |           |           | 1 | 2/10/2015 | 2/5/2016 | 9,000,000.00 € | 13,026,772.00 € | 54,044,448.00 € |
| ITC49 | 1 | n. 226 del 3 marzo 2015 - n. 312 del 31 dicembre 2015 - n. 327 del 22 marzo 2016 - n. 348 del 3 giugno 2016 - n. 377 del 16 agosto 2016                     | 11/11/2014 | 11/22/2014 |           |           | 1 | 2/10/2015 | 2/5/2016 | 9,000,000.00 € | 13,026,772.00 € | 54,044,448.00 € |
| ITC4D | 1 | n. 226 del 3 marzo 2015 - n. 312 del 31 dicembre 2015 - n. 327 del 22 marzo 2016 - n. 348 del 3 giugno 2016 - n. 377 del 16 agosto 2016                     | 11/11/2014 | 11/22/2014 |           |           | 1 | 2/10/2015 | 2/5/2016 | 9,000,000.00 € | 13,026,772.00 € | 54,044,448.00 € |
| ITF61 | 1 | n. 289 del 29 settembre 2015 - n. 341 del 9 maggio 2016 - n. 420 del 1 dicembre 2016 (chiusura) - n. 544 del 18 settembre 2018 - n. 569 del 16 gennaio 2019 | 1/29/2015  | 2/2/2015   | 2/22/2015 | 3/26/2015 | 2 | 9/10/2015 | 9/4/2016 | 3,099,859.27 € | 1,774,900.00 €  | 11,757,705.07 € |
| ITF63 | 1 | n. 289 del 29 settembre 2015 - n. 341 del 9 maggio 2016 - n. 420 del 1 dicembre 2016                                                                        | 1/29/2015  | 2/2/2015   | 2/22/2015 | 3/26/2015 | 2 | 9/10/2015 | 9/4/2016 | 3,099,859.27 € | 1,774,900.00 €  | 11,757,705.07 € |

|       |   |                                                                                                                                                                                                                                       |           |           |           |           |          |          |          |           |   |           |           |                 |                 |                  |
|-------|---|---------------------------------------------------------------------------------------------------------------------------------------------------------------------------------------------------------------------------------------|-----------|-----------|-----------|-----------|----------|----------|----------|-----------|---|-----------|-----------|-----------------|-----------------|------------------|
| ITF65 | 1 | (chiusura) - n. 544 del 18 settembre 2018 - n. 569 del 16 gennaio 2019<br>n. 289 del 29 settembre 2015 - n. 341 del 9 maggio 2016 - n. 420 del 1 dicembre 2016 (chiusura) - n. 544 del 18 settembre 2018 - n. 569 del 16 gennaio 2019 | 1/29/2015 | 2/2/2015  | 2/22/2015 | 3/26/2015 |          |          |          |           | 2 | 9/10/2015 | 9/4/2016  | 3,099,859.27 €  | 1,774,900.00 €  | 11,757,705.07 €  |
| ITF62 | 1 | n. 289 del 29 settembre 2015 - n. 341 del 9 maggio 2016 - n. 420 del 1 dicembre 2016 (chiusura) - n. 544 del 18 settembre 2018 - n. 569 del 16 gennaio 2019                                                                           | 1/29/2015 | 2/2/2015  | 2/22/2015 | 3/26/2015 |          |          |          |           | 2 | 9/10/2015 | 9/4/2016  | 3,099,859.27 €  | 1,774,900.00 €  | 11,757,705.07 €  |
| ITH51 | 1 | n. 232 del 30 marzo 2015 - n. 350 del 3 giugno 2016 (chiusura) - n. 374 del 16 agosto 2016 - n. 449 del 24 aprile 2017 - n. 522 del 31 maggio 2018                                                                                    | 2/4/2015  | 2/7/2015  |           |           |          |          |          |           | 1 | 3/12/2015 | 3/6/2016  | 13,800,000.00 € | 27,682,297.00 € | 224,980,038.63 € |
| ITH52 | 1 | n. 232 del 30 marzo 2015 - n. 350 del 3 giugno 2016 (chiusura) - n. 374 del 16 agosto 2016 - n. 449 del 24 aprile 2017 - n. 522 del 31 maggio 2018                                                                                    | 2/4/2015  | 2/7/2015  |           |           |          |          |          |           | 1 | 3/12/2015 | 3/6/2016  | 13,800,000.00 € | 27,682,297.00 € | 224,980,038.63 € |
| ITH53 | 1 | n. 232 del 30 marzo 2015 - n. 350 del 3 giugno 2016 (chiusura) - n. 374 del 16 agosto 2016 - n. 449 del 24 aprile 2017 - n. 522 del 31 maggio 2018                                                                                    | 2/4/2015  | 2/7/2015  |           |           |          |          |          |           | 1 | 3/12/2015 | 3/6/2016  | 13,800,000.00 € | 27,682,297.00 € | 224,980,038.63 € |
| ITH54 | 1 | n. 232 del 30 marzo 2015 - n. 350 del 3 giugno 2016 (chiusura) - n. 374 del 16 agosto 2016 - n. 449 del 24 aprile 2017 - n. 522 del 31 maggio 2018                                                                                    | 2/4/2015  | 2/7/2015  |           |           |          |          |          |           | 1 | 3/12/2015 | 3/6/2016  | 13,800,000.00 € | 27,682,297.00 € | 224,980,038.63 € |
| ITH55 | 1 | n. 232 del 30 marzo 2015 - n. 350 del 3 giugno 2016 (chiusura) - n. 374 del 16 agosto 2016 - n. 449 del 24 aprile 2017 - n. 522 del 31 maggio 2018                                                                                    | 2/4/2015  | 2/7/2015  |           |           |          |          |          |           | 1 | 3/12/2015 | 3/6/2016  | 13,800,000.00 € | 27,682,297.00 € | 224,980,038.63 € |
| ITH56 | 1 | n. 232 del 30 marzo 2015 - n. 350 del 3 giugno 2016 (chiusura) - n. 374 del 16 agosto 2016 - n. 449 del 24 aprile 2017 - n. 522 del 31 maggio 2018                                                                                    | 2/4/2015  | 2/7/2015  |           |           |          |          |          |           | 1 | 3/12/2015 | 3/6/2016  | 13,800,000.00 € | 27,682,297.00 € | 224,980,038.63 € |
| ITH57 | 1 | n. 232 del 30 marzo 2015 - n. 350 del 3 giugno 2016 (chiusura) - n. 374 del 16 agosto 2016 - n. 449 del 24 aprile 2017 - n. 522 del 31 maggio 2018                                                                                    | 2/4/2015  | 2/7/2015  |           |           |          |          |          |           | 1 | 3/12/2015 | 3/6/2016  | 13,800,000.00 € | 27,682,297.00 € | 224,980,038.63 € |
| ITH58 | 1 | n. 232 del 30 marzo 2015 - n. 350 del 3 giugno 2016 (chiusura) - n. 374 del 16 agosto 2016 - n. 449 del 24 aprile 2017 - n. 522 del 31 maggio 2018                                                                                    | 2/4/2015  | 2/7/2015  |           |           |          |          |          |           | 1 | 3/12/2015 | 3/6/2016  | 13,800,000.00 € | 27,682,297.00 € | 224,980,038.63 € |
| ITH59 | 1 | n. 232 del 30 marzo 2015 - n. 350 del 3 giugno 2016 (chiusura) - n. 374 del 16 agosto 2016 - n. 449 del 24 aprile 2017 - n. 522 del 31 maggio 2018                                                                                    | 2/4/2015  | 2/7/2015  |           |           |          |          |          |           | 1 | 3/12/2015 | 3/6/2016  | 13,800,000.00 € | 27,682,297.00 € | 224,980,038.63 € |
| ITG14 | 1 | n. 257 del 30 maggio 2015 - n. 382 del 16 agosto 2016 - n. 435 del 20 gennaio 2017 - n. 446 del 11/04/17                                                                                                                              | 2/16/2015 | 2/17/2015 | 2/21/2015 | 2/26/2015 | 3/5/2015 | 3/7/2015 | 3/8/2015 | 4/10/2015 | 2 | 5/18/2015 | 5/12/2016 | 27,250,000.00 € | 2,203,581.00 €  | 53,452,576.00 €  |
| ITG17 | 0 | n. 257 del 30 maggio 2015 - n. 382 del 16 agosto 2016 - n. 435 del 20 gennaio 2017 - n. 446 del 11/04/17                                                                                                                              | 2/16/2015 | 2/17/2015 | 2/21/2015 | 2/26/2015 | 3/5/2015 | 3/7/2015 | 3/8/2015 | 4/10/2015 | 2 | 5/18/2015 | 5/12/2016 | 27,250,000.00 € | 2,203,581.00 €  | 53,452,576.00 €  |

|       |   |                                                                                                                                                         |           |           |           |           |          |          |          |           |   |           |           |                 |                 |                  |
|-------|---|---------------------------------------------------------------------------------------------------------------------------------------------------------|-----------|-----------|-----------|-----------|----------|----------|----------|-----------|---|-----------|-----------|-----------------|-----------------|------------------|
| ITG16 | 1 | n. 257 del 30 maggio 2015 - n. 382 del 16 agosto 2016 - n. 435 del 20 gennaio 2017 - n. 446 del 11/04/17                                                | 2/16/2015 | 2/17/2015 | 2/21/2015 | 2/26/2015 | 3/5/2015 | 3/7/2015 | 3/8/2015 | 4/10/2015 | 2 | 5/18/2015 | 5/12/2016 | 27,250,000.00 € | 2,203,581.00 €  | 53,452,576.00 €  |
| ITG13 | 1 | n. 257 del 30 maggio 2015 - n. 382 del 16 agosto 2016 - n. 435 del 20 gennaio 2017 - n. 446 del 11/04/17                                                | 2/16/2015 | 2/17/2015 | 2/21/2015 | 2/26/2015 | 3/5/2015 | 3/7/2015 | 3/8/2015 | 4/10/2015 | 2 | 5/18/2015 | 5/12/2016 | 27,250,000.00 € | 2,203,581.00 €  | 53,452,576.00 €  |
| ITG12 | 1 | n. 257 del 30 maggio 2015 - n. 382 del 16 agosto 2016 - n. 435 del 20 gennaio 2017 - n. 446 del 11/04/17                                                | 2/16/2015 | 2/17/2015 | 2/21/2015 | 2/26/2015 | 3/5/2015 | 3/7/2015 | 3/8/2015 | 4/10/2015 | 2 | 5/18/2015 | 5/12/2016 | 27,250,000.00 € | 2,203,581.00 €  | 53,452,576.00 €  |
| ITG11 | 1 | n. 257 del 30 maggio 2015 - n. 382 del 16 agosto 2016 - n. 435 del 20 gennaio 2017 - n. 446 del 11/04/17                                                | 2/16/2015 | 2/17/2015 | 2/21/2015 | 2/26/2015 | 3/5/2015 | 3/7/2015 | 3/8/2015 | 4/10/2015 | 2 | 5/18/2015 | 5/12/2016 | 27,250,000.00 € | 2,203,581.00 €  | 53,452,576.00 €  |
| ITG15 | 1 | n. 257 del 30 maggio 2015 - n. 382 del 16 agosto 2016 - n. 435 del 20 gennaio 2017 - n. 446 del 11/04/17                                                | 2/16/2015 | 2/17/2015 | 2/21/2015 | 2/26/2015 | 3/5/2015 | 3/7/2015 | 3/8/2015 | 4/10/2015 | 2 | 5/18/2015 | 5/12/2016 | 27,250,000.00 € | 2,203,581.00 €  | 53,452,576.00 €  |
| ITF11 | 1 | n. 256 del 26 marzo 2015 - n. 336 dell'11 aprile 2016 - n. 372 del 16 agosto 2016 - n. 416 del 28 novembre 2016 (chiusura) - n. 488 del 30 ottobre 2017 | 3/4/2015  | 3/6/2015  |           |           |          |          |          |           | 1 | 4/29/2015 | 4/23/2016 | 30,500,000.00 € | 23,457,004.00 € | 543,896,806.00 € |
| ITF12 | 1 | n. 256 del 26 marzo 2015 - n. 336 dell'11 aprile 2016 - n. 372 del 16 agosto 2016 - n. 416 del 28 novembre 2016 (chiusura) - n. 488 del 30 ottobre 2017 | 3/4/2015  | 3/6/2015  |           |           |          |          |          |           | 1 | 4/29/2015 | 4/23/2016 | 30,500,000.00 € | 23,457,004.00 € | 543,896,806.00 € |
| ITF13 | 1 | n. 256 del 26 marzo 2015 - n. 336 dell'11 aprile 2016 - n. 372 del 16 agosto 2016 - n. 416 del 28 novembre 2016 (chiusura) - n. 488 del 30 ottobre 2017 | 3/4/2015  | 3/6/2015  |           |           |          |          |          |           | 1 | 4/29/2015 | 4/23/2016 | 30,500,000.00 € | 23,457,004.00 € | 543,896,806.00 € |
| ITF14 | 1 | n. 256 del 26 marzo 2015 - n. 336 dell'11 aprile 2016 - n. 372 del 16 agosto 2016 - n. 416 del 28 novembre 2016 (chiusura) - n. 488 del 30 ottobre 2017 | 3/4/2015  | 3/6/2015  |           |           |          |          |          |           | 1 | 4/29/2015 | 4/23/2016 | 30,500,000.00 € | 23,457,004.00 € | 543,896,806.00 € |
| ITI31 | 1 | n. 264 del 3 luglio 2015 - n. 378 del 16 agosto 2016 - n. 407 del 15 novembre 2016 (chiusura) - n. 537 del 10 agosto 2018                               | 3/4/2015  | 3/6/2015  |           |           |          |          |          |           | 1 | 6/11/2015 | 6/1/2016  | 17,999,821.55 € | 3,109,810.00 €  | 91,163,202.00 €  |
| ITI32 | 1 | n. 264 del 3 luglio 2015 - n. 378 del 16 agosto 2016 - n. 407 del 15 novembre 2016 (chiusura) - n. 537 del 10 agosto 2018                               | 3/4/2015  | 3/6/2015  |           |           |          |          |          |           | 1 | 6/11/2015 | 6/1/2016  | 17,999,821.55 € | 3,109,810.00 €  | 91,163,202.00 €  |
| ITI33 | 1 | n. 264 del 3 luglio 2015 - n. 378 del 16 agosto 2016 - n. 407 del 15 novembre 2016 (chiusura) - n. 537 del 10 agosto 2018                               | 3/4/2015  | 3/6/2015  |           |           |          |          |          |           | 1 | 6/11/2015 | 6/1/2016  | 17,999,821.55 € | 3,109,810.00 €  | 91,163,202.00 €  |
| ITI34 | 1 | n. 264 del 3 luglio 2015 - n. 378 del 16 agosto 2016 - n. 407 del 15 novembre 2016 (chiusura) - n. 537 del 10 agosto 2018                               | 3/4/2015  | 3/6/2015  |           |           |          |          |          |           | 1 | 6/11/2015 | 6/1/2016  | 17,999,821.55 € | 3,109,810.00 €  | 91,163,202.00 €  |
| ITI35 | 1 | n. 264 del 3 luglio 2015 - n. 378 del 16 agosto 2016 - n. 407 del 15 novembre 2016 (chiusura) - n. 537 del 10 agosto 2018                               | 3/4/2015  | 3/6/2015  |           |           |          |          |          |           | 1 | 6/11/2015 | 6/1/2016  | 17,999,821.55 € | 3,109,810.00 €  | 91,163,202.00 €  |
| ITI18 | 1 | n. 255 del 25 marzo 2015 - n. 353 dell'11 luglio 2016 (chiusura) - n. 383 del 16 agosto 2016 - n. 466 del 7 luglio 2017                                 | 3/5/2015  | 3/5/2015  |           |           |          |          |          |           | 1 | 4/29/2015 | 4/23/2016 | 12,500,000.00 € | 63,014,890.00 € | 169,727,487.00 € |
| ITI14 | 1 | n. 255 del 25 marzo 2015 - n. 353 dell'11 luglio 2016 (chiusura) - n. 383 del 16 agosto 2016 - n. 466 del 7 luglio 2017                                 | 3/5/2015  | 3/5/2015  |           |           |          |          |          |           | 1 | 4/29/2015 | 4/23/2016 | 12,500,000.00 € | 63,014,890.00 € | 169,727,487.00 € |

|       |   |                                                                                                                                                                         |           |           |           |           |   |           |           |                 |                 |                  |
|-------|---|-------------------------------------------------------------------------------------------------------------------------------------------------------------------------|-----------|-----------|-----------|-----------|---|-----------|-----------|-----------------|-----------------|------------------|
| ITI1A | 0 | n. 255 del 25 marzo 2015 - n. 353 dell'11 luglio 2016 (chiusura) - n. 383 del 16 agosto 2016 - n. 466 del 7 luglio 2017                                                 | 3/5/2015  | 3/5/2015  |           |           | 1 | 4/29/2015 | 4/23/2016 | 12,500,000.00 € | 63,014,890.00 € | 169,727,487.00 € |
| ITI16 | 0 | n. 255 del 25 marzo 2015 - n. 353 dell'11 luglio 2016 (chiusura) - n. 383 del 16 agosto 2016 - n. 466 del 7 luglio 2017                                                 | 3/5/2015  | 3/5/2015  |           |           | 1 | 4/29/2015 | 4/23/2016 | 12,500,000.00 € | 63,014,890.00 € | 169,727,487.00 € |
| ITI12 | 1 | n. 255 del 25 marzo 2015 - n. 353 dell'11 luglio 2016 (chiusura) - n. 383 del 16 agosto 2016 - n. 466 del 7 luglio 2017                                                 | 3/5/2015  | 3/5/2015  |           |           | 1 | 4/29/2015 | 4/23/2016 | 12,500,000.00 € | 63,014,890.00 € | 169,727,487.00 € |
| ITI11 | 1 | n. 255 del 25 marzo 2015 - n. 353 dell'11 luglio 2016 (chiusura) - n. 383 del 16 agosto 2016 - n. 466 del 7 luglio 2017                                                 | 3/5/2015  | 3/5/2015  |           |           | 1 | 4/29/2015 | 4/23/2016 | 12,500,000.00 € | 63,014,890.00 € | 169,727,487.00 € |
| ITI17 | 0 | n. 255 del 25 marzo 2015 - n. 353 dell'11 luglio 2016 (chiusura) - n. 383 del 16 agosto 2016 - n. 466 del 7 luglio 2017                                                 | 3/5/2015  | 3/5/2015  |           |           | 1 | 4/29/2015 | 4/23/2016 | 12,500,000.00 € | 63,014,890.00 € | 169,727,487.00 € |
| ITI15 | 1 | n. 255 del 25 marzo 2015 - n. 353 dell'11 luglio 2016 (chiusura) - n. 383 del 16 agosto 2016 - n. 466 del 7 luglio 2017                                                 | 3/5/2015  | 3/5/2015  |           |           | 1 | 4/29/2015 | 4/23/2016 | 12,500,000.00 € | 63,014,890.00 € | 169,727,487.00 € |
| ITI13 | 1 | n. 255 del 25 marzo 2015 - n. 353 dell'11 luglio 2016 (chiusura) - n. 383 del 16 agosto 2016 - n. 466 del 7 luglio 2017                                                 | 3/5/2015  | 3/5/2015  |           |           | 1 | 4/29/2015 | 4/23/2016 | 12,500,000.00 € | 63,014,890.00 € | 169,727,487.00 € |
| ITI19 | 0 | n. 255 del 25 marzo 2015 - n. 353 dell'11 luglio 2016 (chiusura) - n. 383 del 16 agosto 2016 - n. 466 del 7 luglio 2017                                                 | 3/5/2015  | 3/5/2015  |           |           | 1 | 4/29/2015 | 4/23/2016 | 12,500,000.00 € | 63,014,890.00 € | 169,727,487.00 € |
| ITF22 | 1 | n. 280 del 4 settembre 2015 - n. 313 del 20 gennaio 2016 - n. 379 del 16 agosto 2016 - n. 403 dell'8 novembre 2016 (chiusura) - n. 439 del 22 febbraio 2017             | 3/5/2015  | 3/6/2015  |           |           | 1 | 6/11/2015 | 6/1/2016  | 17,999,821.55 € | 3,109,810.00 €  | 91,163,202.00 €  |
| ITF21 | 1 | n. 280 del 4 settembre 2015 - n. 313 del 20 gennaio 2016 - n. 379 del 16 agosto 2016 - n. 403 dell'8 novembre 2016 (chiusura) - n. 439 del 22 febbraio 2017             | 3/5/2015  | 3/6/2015  |           |           | 1 | 6/11/2015 | 6/1/2016  | 17,999,821.55 € | 3,109,810.00 €  | 91,163,202.00 €  |
| ITC11 | 1 | n. 269 del 24 luglio 2015 - n. 380 del 16 agosto 2016 - n. 401 del 7 novembre 2016 (chiusura)                                                                           | 3/15/2015 | 3/17/2015 | 3/23/2015 | 3/25/2015 | 1 | 6/26/2015 | 6/20/2016 | 9,700,000.00 €  | 23,500.00 €     | 459,116.00 €     |
| ITC16 | 1 | n. 269 del 24 luglio 2015 - n. 380 del 16 agosto 2016 - n. 401 del 7 novembre 2016 (chiusura)                                                                           | 3/15/2015 | 3/17/2015 | 3/23/2015 | 3/25/2015 | 1 | 6/26/2015 | 6/20/2016 | 9,700,000.00 €  | 23,500.00 €     | 459,116.00 €     |
| ITC17 | 1 | n. 269 del 24 luglio 2015 - n. 380 del 16 agosto 2016 - n. 401 del 7 novembre 2016 (chiusura)                                                                           | 3/15/2015 | 3/17/2015 | 3/23/2015 | 3/25/2015 | 1 | 6/26/2015 | 6/20/2016 | 9,700,000.00 €  | 23,500.00 €     | 459,116.00 €     |
| ITC18 | 1 | n. 269 del 24 luglio 2015 - n. 380 del 16 agosto 2016 - n. 401 del 7 novembre 2016 (chiusura)                                                                           | 3/15/2015 | 3/17/2015 | 3/23/2015 | 3/25/2015 | 1 | 6/26/2015 | 6/20/2016 | 9,700,000.00 €  | 23,500.00 €     | 459,116.00 €     |
| ITG12 | 1 | n. 258 del 30 maggio 2015 - n. 446 dell'11 aprile 2017 (chiusura)                                                                                                       | 4/10/2015 | 4/10/2015 |           |           | 1 | 5/18/2015 | 5/12/2016 | N/A             | N/A             | N/A              |
| ITH33 | 1 | n. 274 del 30 luglio 2015 - n. 278 del 17 agosto 2015n. 291 del 15 ottobre 2015 - n. 385 del 16 agosto 2016 - n. 395 del 21 settembre 2016 - n. 499 del 24 gennaio 2018 | 7/8/2015  | 7/8/2015  | 8/4/2015  | 8/4/2015  | 1 | 7/17/2015 | 7/11/2016 | 4,000,000.00 €  | 25,736,833.68 € | 80,325,493.03 €  |
| ITH35 | 1 | n. 274 del 30 luglio 2015 - n. 278 del 17 agosto 2015n. 291 del 15 ottobre 2015 - n. 385 del 16 agosto 2016 - n. 395 del 21 settembre 2016 - n. 499 del 24 gennaio 2018 | 7/8/2015  | 7/8/2015  | 8/4/2015  | 8/4/2015  | 1 | 7/17/2015 | 7/11/2016 | 4,000,000.00 €  | 25,736,833.68 € | 80,325,493.03 €  |



|       |   |                                                                                                                                                                |            |            |   |           |            |                 |                 |                 |
|-------|---|----------------------------------------------------------------------------------------------------------------------------------------------------------------|------------|------------|---|-----------|------------|-----------------|-----------------|-----------------|
| ITF61 | 1 | n. 285 del 16 settembre 2015 - n. 329 del 25 marzo 2016 - n. 412 del 18 novembre 2016 (chiusura) - n. 544 del 18 settembre 2018 - n. 546 del 18 settembre 2018 | 8/12/2015  | 8/12/2015  | 1 | 8/27/2015 | 8/21/2016  | 3,919,832.87 €  | 6,963,105.00 €  | 14,241,393.00 € |
| ITI19 | 1 | n. 300 del 19 novembre 2015 - n. 383 del 16 agosto 2016 - n. 428 del 9 gennaio 2017 (chiusura)                                                                 | 8/24/2015  | 8/25/2015  | 1 | 11/6/2015 | 10/31/2016 | 2,000,000.00 €  | 2,290,987.00 €  | 12,805,822.00 € |
| ITG13 | 1 | n. 340 del 9 maggio 2016 - n. 459 del 1 giugno 2017 (chiusura) - 544 del 18 settembre 2018 - n. 549 del 28 settembre 2018                                      | 9/8/2015   | 11/3/2015  | 3 | 2/19/2016 | 2/13/2017  | 23,650,000.00 € | 1,753,367.00 €  | 3,085,361.00 €  |
| ITG16 | 1 | n. 340 del 9 maggio 2016 - n. 459 del 1 giugno 2017 (chiusura) - 544 del 18 settembre 2018 - n. 549 del 28 settembre 2018                                      | 9/8/2015   | 11/3/2015  | 3 | 2/19/2016 | 2/13/2017  | 23,650,000.00 € | 1,753,367.00 €  | 3,085,361.00 €  |
| ITG17 | 1 | n. 340 del 9 maggio 2016 - n. 459 del 1 giugno 2017 (chiusura) - 544 del 18 settembre 2018 - n. 549 del 28 settembre 2018                                      | 9/8/2015   | 11/3/2015  | 3 | 2/19/2016 | 2/13/2017  | 23,650,000.00 € | 1,753,367.00 €  | 3,085,361.00 €  |
| ITH52 | 1 | n. 292 del 19 ottobre 2015 - n. 374 del 16 agosto 2016 - n. 402 dell'8 novembre 2016 (chiusura) - n. 500 del 21 gennaio 2018                                   | 9/13/2015  | 9/14/2015  | 1 | 9/25/2015 | 9/19/2016  | 10,000,000.00 € | 17,673,998.00 € | 90,185,739.00 € |
| ITH51 | 1 | n. 292 del 19 ottobre 2015 - n. 374 del 16 agosto 2016 - n. 402 dell'8 novembre 2016 (chiusura) - n. 500 del 21 gennaio 2018                                   | 9/13/2015  | 9/14/2015  | 1 | 9/25/2015 | 9/19/2016  | 10,000,000.00 € | 17,673,998.00 € | 90,185,739.00 € |
| ITH33 | 1 | n. 411 del 18 novembre 2016 - n. 457 del 1 giugno 2017 (chiusura) - 544 del 18 settembre 2018 - n. 571 del 24 gennaio 2019                                     | 9/14/2015  | 9/14/2015  | 1 | 2/19/2016 | 2/13/2017  | 23,650,000.00 € | 1,753,367.00 €  | 3,085,361.00 €  |
| ITH36 | 1 | n. 411 del 18 novembre 2016 - n. 457 del 1 giugno 2017 (chiusura) - 544 del 18 settembre 2018 - n. 571 del 24 gennaio 2019                                     | 9/14/2015  | 9/14/2015  | 1 | 5/10/2016 | 5/5/2017   | 4,100,000.00 €  | 274,974.00 €    | 18,103,610.00 € |
| ITH34 | 0 | n. 411 del 18 novembre 2016 - n. 457 del 1 giugno 2017 (chiusura) - 544 del 18 settembre 2018 - n. 571 del 24 gennaio 2019                                     | 9/14/2015  | 9/14/2015  | 1 | 5/10/2016 | 5/5/2017   | 4,100,000.00 €  | 274,974.00 €    | 18,103,610.00 € |
| ITH35 | 0 | n. 411 del 18 novembre 2016 - n. 457 del 1 giugno 2017 (chiusura) - 544 del 18 settembre 2018 - n. 571 del 24 gennaio 2019                                     | 9/14/2015  | 9/14/2015  | 1 | 5/10/2016 | 5/5/2017   | 4,100,000.00 €  | 274,974.00 €    | 18,103,610.00 € |
| ITH32 | 0 | n. 411 del 18 novembre 2016 - n. 457 del 1 giugno 2017 (chiusura) - 544 del 18 settembre 2018 - n. 571 del 24 gennaio 2019                                     | 9/14/2015  | 9/14/2015  | 1 | 5/10/2016 | 5/5/2017   | 4,100,000.00 €  | 274,974.00 €    | 18,103,610.00 € |
| ITG2E | 1 | n. 360 del 14 luglio 2016 - n. 370 dell'11 agosto 2016 - n. 464 del 3 luglio 2017 - 544 del 18 settembre 2018 - n. 551 del 19 ottobre 2018                     | 9/30/2015  | 10/10/2015 | 2 | 2/19/2016 | 2/13/2017  | 8,000,000.00 €  | 1,432,293.00 €  | 51,136,026.00 € |
| ITG2D | 0 | n. 360 del 14 luglio 2016 - n. 370 dell'11 agosto 2016 - n. 464 del 3 luglio 2017 - 544 del 18 settembre 2018 - n. 551 del 19 ottobre 2018                     | 9/30/2015  | 10/10/2015 | 2 | 2/19/2016 | 2/13/2017  | 8,000,000.00 €  | 1,432,293.00 €  | 51,136,026.00 € |
| ITF46 | 1 | n. 355 del 14 luglio 2016 - n. 450 del 4 maggio 2017 - 544 del 18 settembre 2018 - n. 588 dell'11 aprile 2019                                                  | 10/10/2015 | 10/22/2015 | 2 | 2/10/2016 | 2/4/2017   | 4,000,000.00 €  | 341,268.45 €    | 36,736,971.68 € |
| ITF43 | 1 | n. 355 del 14 luglio 2016 - n. 450 del 4 maggio 2017 - 544 del 18 settembre 2018 - n. 588 dell'11 aprile 2019                                                  | 10/10/2015 | 10/22/2015 | 2 | 2/10/2016 | 2/4/2017   | 4,000,000.00 €  | 341,268.45 €    | 36,736,971.68 € |

|       |   |                                                                                                                                                                                                                                                                                    |            |            |   |           |            |                 |                  |                    |
|-------|---|------------------------------------------------------------------------------------------------------------------------------------------------------------------------------------------------------------------------------------------------------------------------------------|------------|------------|---|-----------|------------|-----------------|------------------|--------------------|
| ITC33 | 1 | n. 299 del 17 novembre 2015 - n. 376 del 16 agosto 2016 - n. 421 del 1 dicembre 2016<br>n. 298 del 17 novembre 2015 - n. 303 del 03 dicembre 2015 - n. 334 dell'11 aprile 2016 -                                                                                                   | 9/13/2015  | 9/14/2015  | 1 | 11/6/2015 | 10/31/2016 | 2,633,174.05 €  | 4,157,904.00 €   | 28,009,421.00 €    |
| ITF34 | 1 | n. 369 del 10 agosto 2016 - 373 del 16 agosto 2016 - n. 429 del 9 gennaio 2017 (chiusura) - n. 509 del 23 febbraio 2018<br>n. 298 del 17 novembre 2015 - n. 303 del 03 dicembre 2015 - n. 334 dell'11 aprile 2016 -                                                                | 10/14/2015 | 10/20/2015 | 1 | 11/6/2015 | 10/31/2016 | 38,000,000.00 € | 281,141,441.04 € | 1,113,073,127.95 € |
| ITF32 | 1 | n. 369 del 10 agosto 2016 - 373 del 16 agosto 2016 - n. 429 del 9 gennaio 2017 (chiusura) - n. 509 del 23 febbraio 2018<br>n. 298 del 17 novembre 2015 - n. 303 del 03 dicembre 2015 - n. 334 dell'11 aprile 2016 -                                                                | 10/14/2015 | 10/20/2015 | 1 | 11/6/2015 | 10/31/2016 | 38,000,000.00 € | 281,141,441.04 € | 1,113,073,127.95 € |
| ITF31 | 1 | n. 369 del 10 agosto 2016 - 373 del 16 agosto 2016 - n. 429 del 9 gennaio 2017 (chiusura) - n. 509 del 23 febbraio 2018<br>n. 295 del 07 novembre 2015 - n. 297 del 13 novembre 2015 - n. 443 del 31 marzo 2017 (chiusura) - n. 506 del 16 febbraio 2018- n. 529 del 6 luglio 2018 | 10/14/2015 | 10/20/2015 | 1 | 11/6/2015 | 10/31/2016 | 38,000,000.00 € | 281,141,441.04 € | 1,113,073,127.95 € |
| ITG17 | 1 | n. 295 del 07 novembre 2015 - n. 297 del 13 novembre 2015 - n. 443 del 31 marzo 2017 (chiusura) - n. 506 del 16 febbraio 2018- n. 529 del 6 luglio 2018                                                                                                                            | 10/24/2015 | 10/24/2015 | 1 | 11/6/2015 | 5/4/2016   | 1,875,000.00 €  | N/A              | N/A                |
| ITG13 | 1 | n. 295 del 07 novembre 2015 - n. 297 del 13 novembre 2015 - n. 443 del 31 marzo 2017 (chiusura) - n. 506 del 16 febbraio 2018- n. 529 del 6 luglio 2018                                                                                                                            | 10/24/2015 | 10/24/2015 | 1 | 11/6/2015 | 5/4/2016   | 1,875,000.00 €  | N/A              | N/A                |
| ITF63 | 1 | n. 330 del 1 aprile 2016 - n. 413 del 18 novembre 2016 - n. 442 del 21 marzo 2017 (chiusura) - n. 544 del 18 settembre 2018 - n. 579 dell'11 marzo 2019                                                                                                                            | 11/30/2015 | 12/2/2015  | 1 | 3/3/2016  | 2/26/2017  | 11,800,000.00 € | 12,226,412.00 €  | 108,907,420.00 €   |
| ITF61 | 1 | n. 330 del 1 aprile 2016 - n. 413 del 18 novembre 2016 - n. 442 del 21 marzo 2017 (chiusura) - n. 544 del 18 settembre 2018 - n. 579 dell'11 marzo 2019                                                                                                                            | 11/30/2015 | 12/2/2015  | 1 | 3/3/2016  | 2/26/2017  | 11,800,000.00 € | 12,226,412.00 €  | 108,907,420.00 €   |
| ITF65 | 1 | n. 330 del 1 aprile 2016 - n. 413 del 18 novembre 2016 - n. 442 del 21 marzo 2017 (chiusura) - n. 544 del 18 settembre 2018 - n. 579 dell'11 marzo 2019                                                                                                                            | 11/30/2015 | 12/2/2015  | 1 | 3/3/2016  | 2/26/2017  | 11,800,000.00 € | 12,226,412.00 €  | 108,907,420.00 €   |
| ITH55 | 1 | n. 351 del 3 giugno 2016 - n. 477 del 29 agosto 2017 (chiusura) - n. 527 del 18 giugno 2018 - n. 544 del 18 settembre 2018                                                                                                                                                         | 2/27/2016  | 3/27/2016  | 3 | 5/10/2016 | 5/5/2017   | 9,200,000.00 €  | 222,682.37 €     | 65,438,526.46 €    |
| ITH56 | 1 | n. 351 del 3 giugno 2016 - n. 477 del 29 agosto 2017 (chiusura) - n. 527 del 18 giugno 2018 - n. 544 del 18 settembre 2018                                                                                                                                                         | 2/27/2016  | 3/27/2016  | 3 | 5/10/2016 | 5/5/2017   | 9,200,000.00 €  | 222,682.37 €     | 65,438,526.46 €    |
| ITH58 | 1 | n. 351 del 3 giugno 2016 - n. 477 del 29 agosto 2017 (chiusura) - n. 527 del 18 giugno 2018 - n. 544 del 18 settembre 2018                                                                                                                                                         | 2/27/2016  | 3/27/2016  | 3 | 5/10/2016 | 5/5/2017   | 9,200,000.00 €  | 222,682.37 €     | 65,438,526.46 €    |
| ITH54 | 1 | n. 351 del 3 giugno 2016 - n. 477 del 29 agosto 2017 (chiusura) - n. 527 del 18 giugno 2018 - n. 544 del 18 settembre 2018                                                                                                                                                         | 2/27/2016  | 3/27/2016  | 3 | 5/10/2016 | 5/5/2017   | 9,200,000.00 €  | 222,682.37 €     | 65,438,526.46 €    |
| ITH52 | 1 | n. 351 del 3 giugno 2016 - n. 477 del 29 agosto 2017 (chiusura) - n. 527 del 18 giugno 2018 - n. 544 del 18 settembre 2018                                                                                                                                                         | 2/27/2016  | 3/27/2016  | 3 | 5/10/2016 | 5/5/2017   | 9,200,000.00 €  | 222,682.37 €     | 65,438,526.46 €    |

|       |   |                                                                                                                                                         |            |            |            |            |           |           |  |   |            |            |                 |                 |                  |
|-------|---|---------------------------------------------------------------------------------------------------------------------------------------------------------|------------|------------|------------|------------|-----------|-----------|--|---|------------|------------|-----------------|-----------------|------------------|
| ITH51 | 1 | n. 351 del 3 giugno 2016 - n. 477 del 29 agosto 2017 (chiusura) - n. 527 del 18 giugno 2018 - n. 544 del 18 settembre 2018                              | 2/27/2016  | 3/27/2016  |            |            |           |           |  | 3 | 5/10/2016  | 5/5/2017   | 9,200,000.00 €  | 222,682.37 €    | 65,438,526.46 €  |
| ITH53 | 1 | n. 351 del 3 giugno 2016 - n. 477 del 29 agosto 2017 (chiusura) - n. 527 del 18 giugno 2018 - n. 544 del 18 settembre 2018                              | 2/27/2016  | 3/27/2016  |            |            |           |           |  | 3 | 5/10/2016  | 5/5/2017   | 9,200,000.00 €  | 222,682.37 €    | 65,438,526.46 €  |
| ITH59 | 1 | n. 351 del 3 giugno 2016 - n. 477 del 29 agosto 2017 (chiusura) - n. 527 del 18 giugno 2018 - n. 544 del 18 settembre 2018                              | 2/27/2016  | 3/27/2016  |            |            |           |           |  | 3 | 5/10/2016  | 5/5/2017   | 9,200,000.00 €  | 222,682.37 €    | 65,438,526.46 €  |
| ITH57 | 1 | n. 351 del 3 giugno 2016 - n. 477 del 29 agosto 2017 (chiusura) - n. 527 del 18 giugno 2018 - n. 544 del 18 settembre 2018                              | 2/27/2016  | 3/27/2016  |            |            |           |           |  | 3 | 5/10/2016  | 5/5/2017   | 9,200,000.00 €  | 222,682.37 €    | 65,438,526.46 €  |
| ITF46 | 1 | n. 410 del 18 novembre 2016 - n. 478 del 31 agosto 2017 (chiusura) - n. 544 del 18 settembre 2018 - n. 612 del 28 ottobre 2019                          | 3/11/2016  | 3/18/2016  |            |            |           |           |  | 1 | 7/28/2016  | 7/23/2017  | 3,000,000.00 €  | 115,000.00 €    | 43,212,527.00 €  |
| ITC46 | 1 | n. 461 del 23 giugno 2017 - n. 517 del 19 aprile 2018 - n. 528 del 26 giugno 2018 - n. 544 del 18 settembre 2018                                        | 6/8/2016   | 6/30/2016  |            |            |           |           |  | 2 | 5/24/2017  | 5/19/2018  | 3,100,000.00 €  | 3,067,391.00 €  | 16,715,789.00 €  |
| ITC44 | 1 | n. 461 del 23 giugno 2017 - n. 517 del 19 aprile 2018 - n. 528 del 26 giugno 2018 - n. 544 del 18 settembre 2018                                        | 6/8/2016   | 6/30/2016  |            |            |           |           |  | 2 | 5/24/2017  | 5/19/2018  | 3,100,000.00 €  | 3,067,391.00 €  | 16,715,789.00 €  |
| ITF46 | 1 | n. 452 del 4 maggio 2017 - n. 536 del 9 agosto 2018 (chiusura) - n. 544 del 18 settembre 2018                                                           | 7/15/2016  | 7/16/2016  | 9/5/2016   | 9/13/2016  | 9/19/2016 | 9/19/2016 |  | 1 | 4/11/2017  | 4/6/2018   | 6,100,000.00 €  | 5,100,674.00 €  | 31,726,443.00 €  |
| ITF47 | 1 | n. 452 del 4 maggio 2017 - n. 536 del 9 agosto 2018 (chiusura) - n. 544 del 18 settembre 2018                                                           | 9/5/2016   | 9/13/2016  | 9/19/2016  | 9/19/2016  |           |           |  | 1 | 4/11/2017  | 4/6/2018   | 6,100,000.00 €  | 5,100,674.00 €  | 31,726,443.00 €  |
| ITF44 | 1 | n. 452 del 4 maggio 2017 - n. 536 del 9 agosto 2018 (chiusura) - n. 544 del 18 settembre 2018                                                           | 9/5/2016   | 9/13/2016  | 9/19/2016  | 9/19/2016  |           |           |  | 1 | 4/11/2017  | 4/6/2018   | 6,100,000.00 €  | 5,100,674.00 €  | 31,726,443.00 €  |
| ITF45 | 1 | n. 452 del 4 maggio 2017 - n. 536 del 9 agosto 2018 (chiusura) - n. 544 del 18 settembre 2018                                                           | 9/5/2016   | 9/13/2016  | 9/19/2016  | 9/19/2016  |           |           |  | 1 | 4/11/2017  | 4/6/2018   | 6,100,000.00 €  | 5,100,674.00 €  | 31,726,443.00 €  |
| ITF48 | 1 | n. 452 del 4 maggio 2017 - n. 536 del 9 agosto 2018 (chiusura) - n. 544 del 18 settembre 2018                                                           | 7/15/2016  | 7/16/2016  | 9/5/2016   | 9/13/2016  | 9/19/2016 | 9/19/2016 |  | 1 | 4/11/2017  | 4/6/2018   | 6,100,000.00 €  | 5,100,674.00 €  | 31,726,443.00 €  |
| ITC33 | 1 | n. 485 del 12 ottobre 2017 - n. 544 del 18 settembre 2018 - n. 596 del 2 luglio 2019 (chiusura) - n. 703 del 23 settembre 2020                          | 10/13/2016 | 10/14/2016 |            |            |           |           |  | 1 | 9/15/2017  | 3/10/2019  | 2,147,000.00 €  | 1,147,266.35 €  | 18,781,159.13 €  |
| ITI43 | 1 | n. 453 del 9 maggio 2017 - n. 498 del 19 gennaio 2018 (chiusura) - n. 544 del 18 settembre 2018 - n. 599 del 25 luglio 2019 - n. 682 del 11 luglio 2020 | 11/6/2016  | 11/6/2016  |            |            |           |           |  | 1 | 4/11/2017  | 10/8/2017  | 1,194,981.82 €  | 1,924,014.00 €  | 11,982,678.00 €  |
| ITG13 | 1 | n. 458 del 1 giugno 2017 n. 523 del 1 giugno 2018 (chiusura) - 544 del 18 settembre 2018 - n. 662 del 16 aprile 2020                                    | 11/24/2016 | 11/25/2016 |            |            |           |           |  | 1 | 2/10/2017  | 2/5/2018   | 11,000,000.00 € | 7,816,683.00 €  | 14,156,866.00 €  |
| ITG14 | 1 | n. 458 del 1 giugno 2017 n. 523 del 1 giugno 2018 (chiusura) - 544 del 18 settembre 2018 - n. 662 del 16 aprile 2020                                    | 11/19/2016 | 11/19/2016 | 11/24/2016 | 11/25/2016 |           |           |  | 1 | 2/10/2017  | 2/5/2018   | 11,000,000.00 € | 7,816,683.00 €  | 14,156,866.00 €  |
| ITC18 | 1 | n. 430 del 10 gennaio 2017 - n. 516 del 17 aprile 2018 (chiusura) - n. 544 del 18 settembre 2018 - n. 668 del 22 aprile 2020                            | 11/21/2016 | 11/25/2016 |            |            |           |           |  | 1 | 12/16/2016 | 12/11/2017 | 55,816,725.75 € | 85,725,130.04 € | 130,663,897.93 € |

|       |   |                                                                                                                                                              |            |            |                     |   |            |            |                 |                 |                  |
|-------|---|--------------------------------------------------------------------------------------------------------------------------------------------------------------|------------|------------|---------------------|---|------------|------------|-----------------|-----------------|------------------|
| ITC17 | 1 | n. 430 del 10 gennaio 2017 - n. 516 del 17 aprile 2018 (chiusura) - n. 544 del 18 settembre 2018 - n. 668 del 22 aprile 2020                                 | 11/21/2016 | 11/25/2016 |                     | 1 | 12/16/2016 | 12/11/2017 | 55,816,725.75 € | 85,725,130.04 € | 130,663,897.93 € |
| ITC16 | 1 | n. 430 del 10 gennaio 2017 - n. 516 del 17 aprile 2018 (chiusura) - n. 544 del 18 settembre 2018 - n. 668 del 22 aprile 2020                                 | 11/21/2016 | 11/25/2016 |                     | 1 | 12/16/2016 | 12/11/2017 | 55,816,725.75 € | 85,725,130.04 € | 130,663,897.93 € |
| ITC11 | 1 | n. 430 del 10 gennaio 2017 - n. 516 del 17 aprile 2018 (chiusura) - n. 544 del 18 settembre 2018 - n. 668 del 22 aprile 2020                                 | 11/21/2016 | 11/25/2016 |                     | 1 | 12/16/2016 | 12/11/2017 | 55,816,725.75 € | 85,725,130.04 € | 130,663,897.93 € |
| ITC32 | 1 | n. 434 dell'11 gennaio 2017 - n. 504 del 26 gennaio 2018 (chiusura) - n. 544 del 18 settembre 2018 - n. 561 del 10 dicembre 2018                             | 11/24/2016 | 11/25/2016 |                     | 1 | 12/16/2016 | 12/11/2017 | 10,996,349.42 € | 13,834,009.00 € | 164,956,675.00 € |
| ITC31 | 1 | n. 434 dell'11 gennaio 2017 - n. 504 del 26 gennaio 2018 (chiusura) - n. 544 del 18 settembre 2018 - n. 561 del 10 dicembre 2018                             | 11/24/2016 | 11/25/2016 |                     | 1 | 12/16/2016 | 12/11/2017 | 10,996,349.42 € | 13,834,009.00 € | 164,956,675.00 € |
| ITF61 | 1 | n. 473 del 4 agosto 2017 - n. 544 del 18 settembre 2018 - n. 577 del 15 febbraio 2019 (chiusura) - n. 844 del 12 gennaio 2022                                | 1/22/2017  | 1/25/2017  |                     | 1 | 5/24/2017  | 11/19/2018 | 21,240,000.00 € | 1,523,879.00 €  | 21,497,380.00 €  |
| ITF63 | 1 | n. 473 del 4 agosto 2017 - n. 544 del 18 settembre 2018 - n. 577 del 15 febbraio 2019 (chiusura) - n. 844 del 12 gennaio 2022                                | 1/22/2017  | 1/25/2017  |                     | 1 | 5/24/2017  | 11/19/2018 | 21,240,000.00 € | 1,523,879.00 €  | 21,497,380.00 €  |
| ITF65 | 1 | n. 473 del 4 agosto 2017 - n. 544 del 18 settembre 2018 - n. 577 del 15 febbraio 2019 (chiusura) - n. 844 del 12 gennaio 2022                                | 11/24/2016 | 11/26/2016 | 1/22/2017 1/25/2017 | 1 | 5/24/2017  | 11/19/2018 | 21,240,000.00 € | 1,523,879.00 €  | 21,497,380.00 €  |
| ITF62 | 1 | n. 473 del 4 agosto 2017 - n. 544 del 18 settembre 2018 - n. 577 del 15 febbraio 2019 (chiusura) - n. 844 del 12 gennaio 2022                                | 11/24/2016 | 11/26/2016 | 1/22/2017 1/25/2017 | 1 | 5/24/2017  | 11/19/2018 | 21,240,000.00 € | 1,523,879.00 €  | 21,497,380.00 €  |
| ITF64 | 1 | n. 473 del 4 agosto 2017 - n. 544 del 18 settembre 2018 - n. 577 del 15 febbraio 2019 (chiusura) - n. 844 del 12 gennaio 2022                                | 1/22/2017  | 1/25/2017  |                     | 1 | 5/24/2017  | 11/19/2018 | 21,240,000.00 € | 1,523,879.00 €  | 21,497,380.00 €  |
| ITF52 | 1 | n. 467 del 14 luglio 2017 - n. 508 del 23 febbraio 2018 - n. 544 del 18 settembre 2018 - n. 572 del 30 gennaio 2019 (chiusura) - n. 865 del 24 febbraio 2022 | 1/5/2017   | 1/18/2017  |                     | 2 | 6/16/2017  | 12/11/2018 | 8,100,000.00 €  | 10,838,728.52 € | 45,808,398.20 €  |
| ITF51 | 1 | n. 467 del 14 luglio 2017 - n. 508 del 23 febbraio 2018 - n. 544 del 18 settembre 2018 - n. 572 del 30 gennaio 2019 (chiusura) - n. 865 del 24 febbraio 2022 | 1/5/2017   | 1/18/2017  |                     | 2 | 6/16/2017  | 12/11/2018 | 8,100,000.00 €  | 10,838,728.52 € | 45,808,398.20 €  |
| ITF46 | 1 | n. 463 del 3 luglio 2017 - n. 512 del 07 marzo 2018 (chiusura) - n. 544 del 18 settembre 2018                                                                | 1/5/2017   | 1/11/2017  |                     | 1 | 6/16/2017  | 12/13/2017 | 10,400,000.00 € | 5,694,249.00 €  | 30,937,373.00 €  |
| ITF47 | 1 | n. 463 del 3 luglio 2017 - n. 512 del 07 marzo 2018 (chiusura) - n. 544 del 18 settembre 2018                                                                | 1/5/2017   | 1/11/2017  |                     | 1 | 6/16/2017  | 12/13/2017 | 10,400,000.00 € | 5,694,249.00 €  | 30,937,374.00 €  |
| ITF43 | 1 | n. 463 del 3 luglio 2017 - n. 512 del 07 marzo 2018 (chiusura) - n. 544 del 18 settembre 2018                                                                | 1/5/2017   | 1/11/2017  |                     | 1 | 6/16/2017  | 12/13/2017 | 10,400,000.00 € | 5,694,249.00 €  | 30,937,375.00 €  |
| ITF44 | 1 | n. 463 del 3 luglio 2017 - n. 512 del 07 marzo 2018 (chiusura) - n. 544 del 18 settembre 2018                                                                | 1/5/2017   | 1/11/2017  |                     | 1 | 6/16/2017  | 12/13/2017 | 10,400,000.00 € | 5,694,249.00 €  | 30,937,376.00 €  |

|       |   |                                                                                                                                                              |           |           |           |           |          |           |           |           |  |   |            |            |                 |                 |                 |
|-------|---|--------------------------------------------------------------------------------------------------------------------------------------------------------------|-----------|-----------|-----------|-----------|----------|-----------|-----------|-----------|--|---|------------|------------|-----------------|-----------------|-----------------|
| ITF45 | 1 | n. 463 del 3 luglio 2017 - n. 512 del 07 marzo 2018 (chiusura) - n. 544 del 18 settembre 2018                                                                | 1/5/2017  | 1/11/2017 |           |           |          |           |           |           |  | 1 | 6/16/2017  | 12/13/2017 | 10,400,000.00 € | 5,694,249.00 €  | 30,937,377.00 € |
| ITF48 | 1 | n. 463 del 3 luglio 2017 - n. 512 del 07 marzo 2018 (chiusura) - n. 544 del 18 settembre 2018                                                                | 1/5/2017  | 1/11/2017 |           |           |          |           |           |           |  | 1 | 6/16/2017  | 12/13/2017 | 10,400,000.00 € | 5,694,249.00 €  | 30,937,378.00 € |
| ITF22 | 1 | n. 481 dell'11 settembre 2017 - n. 544 del 18 settembre 2018 - n. 585 del 4 aprile 2019 (chiusura) - n. 628 del 16 gennaio 2020 - n. 843 del 12 gennaio 2022 | 1/5/2017  | 1/10/2017 | 1/13/2017 | 1/19/2017 |          |           |           |           |  | 1 | 6/16/2017  | 12/11/2018 | 5,400,000.00 €  | 142,814.00 €    | 30,402,793.00 € |
| ITF21 | 1 | n. 481 dell'11 settembre 2017 - n. 544 del 18 settembre 2018 - n. 585 del 4 aprile 2019 (chiusura) - n. 628 del 16 gennaio 2020 - n. 843 del 12 gennaio 2022 | 1/5/2017  | 1/10/2017 | 1/13/2017 | 1/19/2017 |          |           |           |           |  | 1 | 6/16/2017  | 12/11/2018 | 5,400,000.00 €  | 142,814.00 €    | 30,402,793.00 € |
| ITG18 | 1 | n. 472 del 4 agosto 2017 - 544 del 18 settembre 2018 - n. 592 dell'8 maggio 2019 (chiusura)                                                                  | 1/21/2017 | 1/23/2017 |           |           |          |           |           |           |  | 1 | 7/10/2017  | 7/5/2018   | 4,000,000.00 €  | 7,478,398.00 €  | 38,716,276.80 € |
| ITG12 | 1 | n. 472 del 4 agosto 2017 - 544 del 18 settembre 2018 - n. 592 dell'8 maggio 2019 (chiusura)                                                                  | 1/21/2017 | 1/23/2017 |           |           |          |           |           |           |  | 1 | 7/10/2017  | 7/5/2018   | 4,000,000.00 €  | 7,478,398.00 €  | 38,716,276.80 € |
| ITH33 | 1 | n. 515 del 27 marzo 2018 - 544 del 18 settembre 2018 - n. 597 del 12 luglio 2019 (chiusura) - n. 841 del 12 gennaio 2022                                     | 6/25/2017 | 6/28/2017 | 7/7/2017  | 7/9/2017  | 8/4/2017 | 8/10/2017 | 8/19/2017 | 8/19/2017 |  | 1 | 12/22/2017 | 6/20/2019  | 6,700,000.00 €  | 34,089,625.00 € | 72,143,397.21 € |
| ITH36 | 1 | n. 515 del 27 marzo 2018 - 544 del 18 settembre 2018 - n. 597 del 12 luglio 2019 (chiusura) - n. 841 del 12 gennaio 2022                                     | 6/25/2017 | 6/28/2017 | 7/7/2017  | 7/9/2017  | 8/4/2017 | 8/10/2017 | 8/19/2017 | 8/19/2017 |  | 1 | 12/22/2017 | 6/20/2019  | 6,700,000.00 €  | 34,089,625.00 € | 72,143,397.21 € |
| ITH37 | 1 | n. 515 del 27 marzo 2018 - 544 del 18 settembre 2018 - n. 597 del 12 luglio 2019 (chiusura) - n. 841 del 12 gennaio 2022                                     | 6/25/2017 | 6/28/2017 | 7/7/2017  | 7/9/2017  | 8/4/2017 | 8/10/2017 | 8/19/2017 | 8/19/2017 |  | 1 | 12/22/2017 | 6/20/2019  | 6,700,000.00 €  | 34,089,625.00 € | 72,143,397.21 € |
| ITH34 | 1 | n. 515 del 27 marzo 2018 - 544 del 18 settembre 2018 - n. 597 del 12 luglio 2019 (chiusura) - n. 841 del 12 gennaio 2022                                     | 6/25/2017 | 6/28/2017 | 7/7/2017  | 7/9/2017  | 8/4/2017 | 8/10/2017 | 8/19/2017 | 8/19/2017 |  | 1 | 12/22/2017 | 6/20/2019  | 6,700,000.00 €  | 34,089,625.00 € | 72,143,397.21 € |
| ITH35 | 1 | n. 515 del 27 marzo 2018 - 544 del 18 settembre 2018 - n. 597 del 12 luglio 2019 (chiusura) - n. 841 del 12 gennaio 2022                                     | 6/25/2017 | 6/28/2017 | 7/7/2017  | 7/9/2017  | 8/4/2017 | 8/10/2017 | 8/19/2017 | 8/19/2017 |  | 1 | 12/22/2017 | 6/20/2019  | 6,700,000.00 €  | 34,089,625.00 € | 72,143,397.21 € |
| ITH31 | 1 | n. 515 del 27 marzo 2018 - 544 del 18 settembre 2018 - n. 597 del 12 luglio 2019 (chiusura) - n. 841 del 12 gennaio 2022                                     | 6/25/2017 | 6/28/2017 | 7/7/2017  | 7/9/2017  | 8/4/2017 | 8/10/2017 | 8/19/2017 | 8/19/2017 |  | 1 | 12/22/2017 | 6/20/2019  | 6,700,000.00 €  | 34,089,625.00 € | 72,143,397.21 € |
| ITH32 | 1 | n. 515 del 27 marzo 2018 - 544 del 18 settembre 2018 - n. 597 del 12 luglio 2019 (chiusura) - n. 841 del 12 gennaio 2022                                     | 6/25/2017 | 6/28/2017 | 7/7/2017  | 7/9/2017  | 8/4/2017 | 8/10/2017 | 8/19/2017 | 8/19/2017 |  | 1 | 12/22/2017 | 6/20/2019  | 6,700,000.00 €  | 34,089,625.00 € | 72,143,397.21 € |
| ITH55 | 0 | n. 511 del 07 marzo 2018 - n. 544 del 18 settembre 2018 - n. 610 del 16 ottobre 2019 (chiusura) - n. 845 del 13 gennaio 2022                                 | 6/28/2017 | 7/11/2017 | 7/24/2017 | 7/29/2017 | 8/6/2017 | 8/10/2017 |           |           |  | 1 | 12/11/2017 | 6/9/2019   | 2,550,000.00 €  | 2,066,579.29 €  | 8,766,634.15 €  |
| ITH58 | 1 | n. 511 del 07 marzo 2018 - n. 544 del 18 settembre 2018 - n. 610 del 16 ottobre 2019 (chiusura) - n. 845 del 13 gennaio 2022                                 | 6/28/2017 | 7/11/2017 | 7/24/2017 | 7/29/2017 | 8/6/2017 | 8/10/2017 |           |           |  | 1 | 12/11/2017 | 6/9/2019   | 2,550,000.00 €  | 2,066,579.29 €  | 8,766,634.15 €  |
| ITH56 | 1 | n. 511 del 07 marzo 2018 - n. 544 del 18 settembre 2018 - n. 610 del 16 ottobre 2019 (chiusura) - n. 845 del 13 gennaio 2022                                 | 6/28/2017 | 7/11/2017 | 7/24/2017 | 7/29/2017 | 8/6/2017 | 8/10/2017 |           |           |  | 1 | 12/11/2017 | 6/9/2019   | 2,550,000.00 €  | 2,066,579.29 €  | 8,766,634.15 €  |
| ITH54 | 0 | n. 511 del 07 marzo 2018 - n. 544 del 18 settembre 2018 - n. 610 del 16 ottobre 2019 (chiusura) - n. 845 del 13 gennaio 2022                                 | 6/28/2017 | 7/11/2017 | 7/24/2017 | 7/29/2017 | 8/6/2017 | 8/10/2017 |           |           |  | 1 | 12/11/2017 | 6/9/2019   | 2,550,000.00 €  | 2,066,579.29 €  | 8,766,634.15 €  |

|       |   |                                                                                                                                                                                                                                                                                |           |            |           |           |          |           |   |            |           |                 |                 |                  |
|-------|---|--------------------------------------------------------------------------------------------------------------------------------------------------------------------------------------------------------------------------------------------------------------------------------|-----------|------------|-----------|-----------|----------|-----------|---|------------|-----------|-----------------|-----------------|------------------|
| ITH51 | 0 | n. 511 del 07 marzo 2018 - n. 544 del 18 settembre 2018 - n. 610 del 16 ottobre 2019 (chiusura) - n. 845 del 13 gennaio 2022                                                                                                                                                   | 6/28/2017 | 7/11/2017  | 7/24/2017 | 7/29/2017 | 8/6/2017 | 8/10/2017 | 1 | 12/11/2017 | 6/9/2019  | 2,550,000.00 €  | 2,066,579.29 €  | 8,766,634.15 €   |
| ITH52 | 0 | n. 511 del 07 marzo 2018 - n. 544 del 18 settembre 2018 - n. 610 del 16 ottobre 2019 (chiusura) - n. 845 del 13 gennaio 2022                                                                                                                                                   | 6/28/2017 | 7/11/2017  | 7/24/2017 | 7/29/2017 | 8/6/2017 | 8/10/2017 | 1 | 12/11/2017 | 6/9/2019  | 2,550,000.00 €  | 2,066,579.29 €  | 8,766,634.15 €   |
| ITH57 | 1 | n. 511 del 07 marzo 2018 - n. 544 del 18 settembre 2018 - n. 610 del 16 ottobre 2019 (chiusura) - n. 845 del 13 gennaio 2022                                                                                                                                                   | 6/28/2017 | 7/11/2017  | 7/24/2017 | 7/29/2017 | 8/6/2017 | 8/10/2017 | 1 | 12/11/2017 | 6/9/2019  | 2,550,000.00 €  | 2,066,579.29 €  | 8,766,634.15 €   |
| ITH53 | 0 | n. 511 del 07 marzo 2018 - n. 544 del 18 settembre 2018 - n. 610 del 16 ottobre 2019 (chiusura) - n. 845 del 13 gennaio 2022                                                                                                                                                   | 6/28/2017 | 7/11/2017  | 7/24/2017 | 7/29/2017 | 8/6/2017 | 8/10/2017 | 1 | 12/11/2017 | 6/9/2019  | 2,550,000.00 €  | 2,066,579.29 €  | 8,766,634.15 €   |
| ITH59 | 0 | n. 511 del 07 marzo 2018 - n. 544 del 18 settembre 2018 - n. 610 del 16 ottobre 2019 (chiusura) - n. 845 del 13 gennaio 2022                                                                                                                                                   | 6/28/2017 | 7/11/2017  | 7/24/2017 | 7/29/2017 | 8/6/2017 | 8/10/2017 | 1 | 12/11/2017 | 6/9/2019  | 2,550,000.00 €  | 2,066,579.29 €  | 8,766,634.15 €   |
| ITC20 | 1 | n. 492 del 29 novembre 2017 - 544 del 18 settembre 2018 - n. 556 del 5 novembre 2018 (chiusura) - n. 629 del 16 gennaio 2020                                                                                                                                                   | 7/30/2017 | 8/10/2017  |           |           |          |           | 1 | 9/28/2017  | 9/23/2018 | 3,000,000.00 €  | 886,403.00 €    | 1,541,329.00 €   |
| ITH43 | 1 | n. 544 del 18 settembre 2018 - n. 555 del 5 novembre 2018 - n. 695 del 18 agosto 2020 (chiusura) - n. 856 del 01 febbraio 2022                                                                                                                                                 | 8/10/2017 | 8/10/2017  |           |           |          |           | 1 | 12/29/2017 | 6/27/2019 | 4,000,000.00 €  | N/A             | N/A              |
| ITH41 | 1 | n. 544 del 18 settembre 2018 - n. 555 del 5 novembre 2018 - n. 695 del 18 agosto 2020 (chiusura) - n. 856 del 01 febbraio 2022                                                                                                                                                 | 8/10/2017 | 8/10/2017  |           |           |          |           | 1 | 12/29/2017 | 6/27/2019 | 4,000,000.00 €  | N/A             | N/A              |
| ITH44 | 1 | n. 544 del 18 settembre 2018 - n. 555 del 5 novembre 2018 - n. 695 del 18 agosto 2020 (chiusura) - n. 856 del 01 febbraio 2022                                                                                                                                                 | 8/10/2017 | 8/10/2017  |           |           |          |           | 1 | 12/29/2017 | 6/27/2019 | 4,000,000.00 €  | N/A             | N/A              |
| ITH42 | 1 | n. 544 del 18 settembre 2018 - n. 555 del 5 novembre 2018 - n. 695 del 18 agosto 2020 (chiusura) - n. 856 del 01 febbraio 2022                                                                                                                                                 | 8/10/2017 | 8/10/2017  |           |           |          |           | 1 | 12/29/2017 | 6/27/2019 | 4,000,000.00 €  | N/A             | N/A              |
| ITI16 | 1 | n. 482 del 20 settembre 2017 - n. 491 del 29 novembre 2017 - n. 494 del 28 dicembre 2017 - 544 del 18 settembre 2018 - n. 552 del 22 ottobre 2018 - n. 565 del 27 dicembre 2018 - n. 589 del 15 aprile 2019 (chiusura) - n. 765 del 2 aprile 2021 - n. 847 del 17 gennaio 2022 | 9/9/2017  | 9/10/2017  |           |           |          |           | 1 | 9/15/2017  | 3/10/2019 | 15,570,000.00 € | 22,266,871.00 € | 81,711,792.00 €  |
| ITH55 | 1 | n. 503 del 26 gennaio 2018 - n. 531 dell'11 luglio 2018 - n. 544 del 18 settembre 2018 - n. 688 del 28 luglio 2020 - n. 842 del 12 gennaio 2022                                                                                                                                | 12/8/2017 | 12/12/2017 |           |           |          |           | 1 | 12/29/2017 | 6/27/2019 | 13,050,000.00 € | 14,158,260.24 € | 116,228,321.10 € |
| ITH56 | 0 | n. 503 del 26 gennaio 2018 - n. 531 dell'11 luglio 2018 - n. 544 del 18 settembre 2018 - n. 688 del 28 luglio 2020 - n. 842 del 12 gennaio 2022                                                                                                                                | 12/8/2017 | 12/12/2017 |           |           |          |           | 1 | 12/29/2017 | 6/27/2019 | 13,050,000.00 € | 14,158,260.24 € | 116,228,321.10 € |
| ITH58 | 1 | n. 503 del 26 gennaio 2018 - n. 531 dell'11 luglio 2018 - n. 544 del 18 settembre 2018 - n. 688 del 28 luglio 2020 - n. 842 del 12 gennaio 2022                                                                                                                                | 12/8/2017 | 12/12/2017 |           |           |          |           | 1 | 12/29/2017 | 6/27/2019 | 13,050,000.00 € | 14,158,260.24 € | 116,228,321.10 € |
| ITH54 | 1 | n. 503 del 26 gennaio 2018 - n. 531 dell'11 luglio 2018 - n. 544 del 18 settembre 2018 - n. 688 del 28 luglio 2020 - n. 842 del 12 gennaio 2022                                                                                                                                | 12/8/2017 | 12/12/2017 |           |           |          |           | 1 | 12/29/2017 | 6/27/2019 | 13,050,000.00 € | 14,158,260.24 € | 116,228,321.10 € |

|       |   |                                                                                                                                                 |           |            |           |           |           |           |           |           |   |            |           |                 |                 |                  |
|-------|---|-------------------------------------------------------------------------------------------------------------------------------------------------|-----------|------------|-----------|-----------|-----------|-----------|-----------|-----------|---|------------|-----------|-----------------|-----------------|------------------|
| ITH52 | 1 | n. 503 del 26 gennaio 2018 - n. 531 dell'11 luglio 2018 - n. 544 del 18 settembre 2018 - n. 688 del 28 luglio 2020 - n. 842 del 12 gennaio 2022 | 12/8/2017 | 12/12/2017 |           |           |           |           |           |           | 1 | 12/29/2017 | 6/27/2019 | 13,050,000.00 € | 14,158,260.24 € | 116,228,321.10 € |
| ITH51 | 1 | n. 503 del 26 gennaio 2018 - n. 531 dell'11 luglio 2018 - n. 544 del 18 settembre 2018 - n. 688 del 28 luglio 2020 - n. 842 del 12 gennaio 2022 | 12/8/2017 | 12/12/2017 |           |           |           |           |           |           | 1 | 12/29/2017 | 6/27/2019 | 13,050,000.00 € | 14,158,260.24 € | 116,228,321.10 € |
| ITH57 | 0 | n. 503 del 26 gennaio 2018 - n. 531 dell'11 luglio 2018 - n. 544 del 18 settembre 2018 - n. 688 del 28 luglio 2020 - n. 842 del 12 gennaio 2022 | 12/8/2017 | 12/12/2017 |           |           |           |           |           |           | 1 | 12/29/2017 | 6/27/2019 | 13,050,000.00 € | 14,158,260.24 € | 116,228,321.10 € |
| ITH53 | 1 | n. 503 del 26 gennaio 2018 - n. 531 dell'11 luglio 2018 - n. 544 del 18 settembre 2018 - n. 688 del 28 luglio 2020 - n. 842 del 12 gennaio 2022 | 12/8/2017 | 12/12/2017 |           |           |           |           |           |           | 1 | 12/29/2017 | 6/27/2019 | 13,050,000.00 € | 14,158,260.24 € | 116,228,321.10 € |
| ITF52 | 1 | n. 507 del 16 febbraio 2018 - n. 544 del 18 settembre 2018 - n. 609 del 16 ottobre 2019 (chiusura) - n. 864 del 24 febbraio 2022                | N/A       | N/A        |           |           |           |           |           |           | 3 | 12/29/2017 | 6/27/2019 | 1,150,000.00 €  | N/A             | 16,945,000.00 €  |
| ITH55 | 1 | n. 533 del 19 luglio 2018 - n. 760 del 29 marzo 2021 (chiusura) - n. 875 dell'11 marzo 2022                                                     | 2/2/2018  | 2/3/2018   | 2/21/2018 | 2/28/2018 | 3/1/2018  | 3/3/2018  | 3/10/2018 | 3/12/2018 | 1 | 4/26/2018  | 4/26/2020 | 9,500,000.00 €  | N/A             | N/A              |
| ITH56 | 0 | n. 533 del 19 luglio 2018 - n. 760 del 29 marzo 2021 (chiusura) - n. 875 dell'11 marzo 2022                                                     | 2/2/2018  | 2/3/2018   | 2/21/2018 | 2/28/2018 | 3/1/2018  | 3/3/2018  | 3/10/2018 | 3/12/2018 | 1 | 4/26/2018  | 4/26/2020 | 9,500,000.00 €  | N/A             | N/A              |
| ITH58 | 1 | n. 533 del 19 luglio 2018 - n. 760 del 29 marzo 2021 (chiusura) - n. 875 dell'11 marzo 2022                                                     | 2/2/2018  | 2/3/2018   | 2/21/2018 | 2/28/2018 | 3/1/2018  | 3/3/2018  | 3/10/2018 | 3/12/2018 | 1 | 4/26/2018  | 4/26/2020 | 9,500,000.00 €  | N/A             | N/A              |
| ITH54 | 1 | n. 533 del 19 luglio 2018 - n. 760 del 29 marzo 2021 (chiusura) - n. 875 dell'11 marzo 2022                                                     | 2/2/2018  | 2/3/2018   | 2/21/2018 | 2/28/2018 | 3/1/2018  | 3/3/2018  | 3/10/2018 | 3/12/2018 | 1 | 4/26/2018  | 4/26/2020 | 9,500,000.00 €  | N/A             | N/A              |
| ITH52 | 1 | n. 533 del 19 luglio 2018 - n. 760 del 29 marzo 2021 (chiusura) - n. 875 dell'11 marzo 2022                                                     | 2/2/2018  | 2/3/2018   | 2/21/2018 | 2/28/2018 | 3/1/2018  | 3/3/2018  | 3/10/2018 | 3/12/2018 | 1 | 4/26/2018  | 4/26/2020 | 9,500,000.00 €  | N/A             | N/A              |
| ITH51 | 1 | n. 533 del 19 luglio 2018 - n. 760 del 29 marzo 2021 (chiusura) - n. 875 dell'11 marzo 2022                                                     | 2/2/2018  | 2/3/2018   | 2/21/2018 | 2/28/2018 | 3/1/2018  | 3/3/2018  | 3/10/2018 | 3/12/2018 | 1 | 4/26/2018  | 4/26/2020 | 9,500,000.00 €  | N/A             | N/A              |
| ITH57 | 1 | n. 533 del 19 luglio 2018 - n. 760 del 29 marzo 2021 (chiusura) - n. 875 dell'11 marzo 2022                                                     | 2/2/2018  | 2/3/2018   | 2/21/2018 | 2/28/2018 | 3/1/2018  | 3/3/2018  | 3/10/2018 | 3/12/2018 | 1 | 4/26/2018  | 4/26/2020 | 9,500,000.00 €  | N/A             | N/A              |
| ITH53 | 1 | n. 533 del 19 luglio 2018 - n. 760 del 29 marzo 2021 (chiusura) - n. 875 dell'11 marzo 2022                                                     | 2/2/2018  | 2/3/2018   | 2/21/2018 | 2/28/2018 | 3/1/2018  | 3/3/2018  | 3/10/2018 | 3/12/2018 | 1 | 4/26/2018  | 4/26/2020 | 9,500,000.00 €  | N/A             | N/A              |
| ITH59 | 1 | n. 533 del 19 luglio 2018 - n. 760 del 29 marzo 2021 (chiusura) - n. 875 dell'11 marzo 2022                                                     | 2/2/2018  | 2/3/2018   | 2/21/2018 | 2/28/2018 | 3/1/2018  | 3/3/2018  | 3/10/2018 | 3/12/2018 | 1 | 4/26/2018  | 4/26/2020 | 9,500,000.00 €  | N/A             | N/A              |
| ITC44 | 1 | n. 524 del 6 giugno 2018 - n. 573 dell'8 febbraio 2019 (chiusura) - n. 866 del 24 febbraio 2022                                                 | 5/29/2018 | 5/29/2018  |           |           |           |           |           |           | 1 | 6/1/2018   | 12/1/2018 | 1,500,000.00 €  | N/A             | N/A              |
| ITC11 | 1 | n. 534 del 25/07/2018 - n. 811 del 29 novembre 2021 (chiusura)                                                                                  | 6/7/2018  | 6/7/2018   |           |           |           |           |           |           | 1 | 6/27/2018  | 6/27/2020 | 2,690,000.00 €  | 0.00 €          | 9,242,431.40 €   |
| ITH31 | 1 | n. 580 del 15 marzo 2019                                                                                                                        | 6/11/2018 | 6/22/2018  | 7/7/2018  | 7/22/2018 | 8/24/2018 | 8/26/2018 | 9/1/2018  | 9/2/2018  | 1 | 1/17/2019  | 1/17/2021 | 500,000.00 €    | 3,855,056.89 €  | 14,761,145.63 €  |

|       |   |                                                                                                                                                                                                                                                                                                                                                                                                                                                                                                                                                                                                                                                                                                                                                                                                                                                                                                                                                                                                                                                                                                                              |           |           |          |           |           |           |          |          |   |           |           |                 |                    |                                  |       |
|-------|---|------------------------------------------------------------------------------------------------------------------------------------------------------------------------------------------------------------------------------------------------------------------------------------------------------------------------------------------------------------------------------------------------------------------------------------------------------------------------------------------------------------------------------------------------------------------------------------------------------------------------------------------------------------------------------------------------------------------------------------------------------------------------------------------------------------------------------------------------------------------------------------------------------------------------------------------------------------------------------------------------------------------------------------------------------------------------------------------------------------------------------|-----------|-----------|----------|-----------|-----------|-----------|----------|----------|---|-----------|-----------|-----------------|--------------------|----------------------------------|-------|
| ITH34 | 1 | n. 580 del 15 marzo 2019                                                                                                                                                                                                                                                                                                                                                                                                                                                                                                                                                                                                                                                                                                                                                                                                                                                                                                                                                                                                                                                                                                     | 6/11/2018 | 6/22/2018 | 7/7/2018 | 7/22/2018 | 8/24/2018 | 8/26/2018 | 9/1/2018 | 9/2/2018 | 1 | 1/17/2019 | 1/17/2021 | 500,000.00<br>€ | 3,855,056.8<br>9 € | 14,761,145.<br>63 €              |       |
| ITH36 | 1 | n. 580 del 15 marzo 2019                                                                                                                                                                                                                                                                                                                                                                                                                                                                                                                                                                                                                                                                                                                                                                                                                                                                                                                                                                                                                                                                                                     | 6/11/2018 | 6/22/2018 | 7/7/2018 | 7/22/2018 | 8/24/2018 | 8/26/2018 | 9/1/2018 | 9/2/2018 | 1 | 1/17/2019 | 1/17/2021 | 500,000.00<br>€ | 3,855,056.8<br>9 € | 14,761,145.<br>63 €              |       |
| ITH37 | 1 | n. 580 del 15 marzo 2019                                                                                                                                                                                                                                                                                                                                                                                                                                                                                                                                                                                                                                                                                                                                                                                                                                                                                                                                                                                                                                                                                                     | 6/11/2018 | 6/22/2018 | 7/7/2018 | 7/22/2018 | 8/24/2018 | 8/26/2018 | 9/1/2018 | 9/2/2018 | 1 | 1/17/2019 | 1/17/2021 | 500,000.00<br>€ | 3,855,056.8<br>9 € | 14,761,145.<br>63 €              |       |
| ITF65 | 1 | n. 545 del 18 settembre 2018 - n. 720 del 4 dicembre 2020 (chiusura) - n. 852 del 24 gennaio 2022                                                                                                                                                                                                                                                                                                                                                                                                                                                                                                                                                                                                                                                                                                                                                                                                                                                                                                                                                                                                                            | 6/14/2018 | 6/17/2018 |          |           |           |           |          |          | 1 | 8/8/2018  | 8/8/2020  | 500,000.00<br>€ | 751,773.36<br>€    | 3,088,955.1<br>4 €               |       |
| ITF64 | 1 | n. 545 del 18 settembre 2018 - n. 720 del 4 dicembre 2020 (chiusura) - n. 852 del 24 gennaio 2022                                                                                                                                                                                                                                                                                                                                                                                                                                                                                                                                                                                                                                                                                                                                                                                                                                                                                                                                                                                                                            | 6/14/2018 | 6/17/2018 |          |           |           |           |          |          | 1 | 8/8/2018  | 8/8/2020  | 500,000.00<br>€ | 751,773.36<br>€    | 3,088,955.1<br>4 €               |       |
| ITH55 | 1 | n. 558 del 15 novembre 2018 - n. 559 del 29 novembre 2018 - n. 560 del 7 dicembre 2018 - n. 564 del 27 dicembre 2018 (Toscana) - n. 568 del 16 gennaio 2019 (Liguria) - n. 575 dell'8 febbraio 2019 - n. 593 del 17 maggio 2019 (Liguria) - n. 601 del 1 agosto 2019 - n. 606 del 18 settembre 2019 - n. 613 del 5 novembre 2019 - n. 694 del 18 agosto 2020 (Marche) - n. 696 del 18 agosto 2020 - n. 727 del 28 dicembre 2020 - n. 769 del 16 aprile 2021 (Veneto) - n. 799 del 1° ottobre 2021 (Veneto) - n. 833 del 12 gennaio 2022 (chiusura Calabria) - n. 834 del 12 gennaio 2022 (chiusura Sardegna) - n. 835 del 12 gennaio 2022 (chiusura Liguria) - n. 836 del 12 gennaio 2022 (chiusura Veneto) - n. 837 del 12 gennaio 2022 (chiusura Friuli-Venezia Giulia) - n. 838 del 12 gennaio 2022 (chiusura Toscana) - n. 840 del 12 gennaio 2022 (chiusura Emilia-Romagna) - n. 850 del 3 febbraio 2022 (chiusura Lazio) - n. 857 del 3 febbraio 2022 (chiusura Sicilia) - n. 858 del 3 febbraio 2022 (chiusura Trento) - n. 859 del 3 febbraio 2022 (chiusura Lombardia) - n. 868 del 1 marzo 2022 (chiusura Bolzano) | 10/5/2018 | 11/5/2018 |          |           |           |           |          |          |   | 3         | 11/8/2018 | 11/8/2021       | #####<br>#####     | 119,622,517,471,347,390<br>.46 € | .66 € |
| ITH58 | 1 | n. 558 del 15 novembre 2018 - n. 559 del 29 novembre 2018 - n. 560 del 7 dicembre 2018 - n. 564 del 27 dicembre 2018 (Toscana) - n. 568 del 16 gennaio 2019 (Liguria) - n. 575 dell'8 febbraio 2019 - n. 593 del 17 maggio 2019 (Liguria) - n. 601 del 1 agosto 2019 - n. 606 del 18 settembre 2019 - n. 613 del 5 novembre 2019 - n. 694 del 18 agosto 2020 (Marche) - n. 696 del 18 agosto 2020 - n. 727 del 28 dicembre 2020 - n. 769 del 16 aprile 2021 (Veneto) - n. 799 del 1° ottobre 2021 (Veneto) - n. 833 del 12 gennaio 2022 (chiusura Calabria) - n. 834 del 12 gennaio 2022 (chiusura Sardegna) - n. 835 del 12 gennaio 2022 (chiusura Liguria) - n. 836 del 12 gennaio 2022 (chiusura                                                                                                                                                                                                                                                                                                                                                                                                                          | 10/5/2018 | 11/5/2018 |          |           |           |           |          |          |   | 3         | 11/8/2018 | 11/8/2021       | #####<br>#####     | 119,622,517,471,347,390<br>.46 € | .66 € |



[illegible]

[illegible]

|                                                                                                                                                                                                                                                                                                                                                                                                                                                                                                                                                                                                                                                                                                                                                                                                                                                                                                                                                                                                                                                                                                                                                                                                                                                                                                                                                                                                                                                                                                                                                                                                                                                                                                                                                                                                                                                                                                                                                                                                                                                                                                                                                                                                                                                                                                                                                                          |   |           |           |   |           |           |       |             |             |       |       |       |
|--------------------------------------------------------------------------------------------------------------------------------------------------------------------------------------------------------------------------------------------------------------------------------------------------------------------------------------------------------------------------------------------------------------------------------------------------------------------------------------------------------------------------------------------------------------------------------------------------------------------------------------------------------------------------------------------------------------------------------------------------------------------------------------------------------------------------------------------------------------------------------------------------------------------------------------------------------------------------------------------------------------------------------------------------------------------------------------------------------------------------------------------------------------------------------------------------------------------------------------------------------------------------------------------------------------------------------------------------------------------------------------------------------------------------------------------------------------------------------------------------------------------------------------------------------------------------------------------------------------------------------------------------------------------------------------------------------------------------------------------------------------------------------------------------------------------------------------------------------------------------------------------------------------------------------------------------------------------------------------------------------------------------------------------------------------------------------------------------------------------------------------------------------------------------------------------------------------------------------------------------------------------------------------------------------------------------------------------------------------------------|---|-----------|-----------|---|-----------|-----------|-------|-------------|-------------|-------|-------|-------|
| Romagna) - n. 850 del 3 febbraio 2022<br>(chiusura Lazio) - n. 857 del 3 febbraio 2022<br>(chiusura Sicilia) - n. 858 del 3 febbraio 2022<br>(chiusura Trento) - n. 859 del 3 febbraio 2022 (chiusura Lombardia) - n. 868 del 1 marzo 2022 (chiusura Bolzano)<br>n. 558 del 15 novembre 2018 - n. 559 del 29 novembre 2018 - n. 560 del 7 dicembre 2018 - n. 564 del 27 dicembre 2018<br>(Toscana) - n. 568 del 16 gennaio 2019<br>(Liguria) - n. 575 dell'8 febbraio 2019 - n. 593 del 17 maggio 2019 (Liguria) - n. 601 del 1 agosto 2019 - n. 606 del 18 settembre 2019 - n. 613 del 5 novembre 2019 - n. 694 del 18 agosto 2020 (Marche) - n. 696 del 18 agosto 2020 - n. 727 del 28 dicembre 2020 - n. 769 del 16 aprile 2021 (Veneto) - n. 799 del 1° ottobre 2021 (Veneto) - n. 833 del 12 gennaio 2022 (chiusura Calabria) - n. 834 del 12 gennaio 2022 (chiusura Sardegna) - n. 835 del 12 gennaio 2022 (chiusura Liguria) - n. 836 del 12 gennaio 2022 (chiusura Veneto) - n. 837 del 12 gennaio 2022 (chiusura Friuli-Venezia Giulia) - n. 838 del 12 gennaio 2022 (chiusura Toscana) - n. 840 del 12 gennaio 2022 (chiusura Emilia-Romagna) - n. 850 del 3 febbraio 2022 (chiusura Lazio) - n. 857 del 3 febbraio 2022 (chiusura Sicilia) - n. 858 del 3 febbraio 2022 (chiusura Trento) - n. 859 del 3 febbraio 2022 (chiusura Lombardia) - n. 868 del 1 marzo 2022 (chiusura Bolzano)<br>n. 558 del 15 novembre 2018 - n. 559 del 29 novembre 2018 - n. 560 del 7 dicembre 2018 - n. 564 del 27 dicembre 2018<br>(Toscana) - n. 568 del 16 gennaio 2019<br>(Liguria) - n. 575 dell'8 febbraio 2019 - n. 593 del 17 maggio 2019 (Liguria) - n. 601 del 1 agosto 2019 - n. 606 del 18 settembre 2019 - n. 613 del 5 novembre 2019 - n. 694 del 18 agosto 2020 (Marche) - n. 696 del 18 agosto 2020 - n. 727 del 28 dicembre 2020 - n. 769 del 16 aprile 2021 (Veneto) - n. 799 del 1° ottobre 2021 (Veneto) - n. 833 del 12 gennaio 2022 (chiusura Calabria) - n. 834 del 12 gennaio 2022 (chiusura Sardegna) - n. 835 del 12 gennaio 2022 (chiusura Liguria) - n. 836 del 12 gennaio 2022 (chiusura Veneto) - n. 837 del 12 gennaio 2022 (chiusura Friuli-Venezia Giulia) - n. 838 del 12 gennaio 2022 (chiusura Toscana) - n. 840 del 12 gennaio 2022 (chiusura Emilia-Romagna) - n. 850 del 3 febbraio 2022 (chiusura Lazio) - n. 857 del 3 febbraio 2022 |   |           |           |   |           |           |       |             |             |       |       |       |
| ITF63                                                                                                                                                                                                                                                                                                                                                                                                                                                                                                                                                                                                                                                                                                                                                                                                                                                                                                                                                                                                                                                                                                                                                                                                                                                                                                                                                                                                                                                                                                                                                                                                                                                                                                                                                                                                                                                                                                                                                                                                                                                                                                                                                                                                                                                                                                                                                                    | 1 | 10/5/2018 | 11/5/2018 | 3 | 11/8/2018 | 11/8/2021 | ##### | 119,622,517 | 471,347,390 | ##### | .46 € | .66 € |
| ITF62                                                                                                                                                                                                                                                                                                                                                                                                                                                                                                                                                                                                                                                                                                                                                                                                                                                                                                                                                                                                                                                                                                                                                                                                                                                                                                                                                                                                                                                                                                                                                                                                                                                                                                                                                                                                                                                                                                                                                                                                                                                                                                                                                                                                                                                                                                                                                                    | 1 | 10/5/2018 | 11/5/2018 | 3 | 11/8/2018 | 11/8/2021 | ##### | 119,622,517 | 471,347,390 | ##### | .46 € | .66 € |

|       |   |                                                                                                                                                                                                                                                                                                                                                                                                                                                                                                                                                                                                                                                                                                                                                                                                                                                                                                                                                                                                                                                                                                                                                                                                                                                                                                                                                                                                                                                                                                                                                                                                                                                                                                                                                                                                                                                                                                                                                                                                                                                                                                                                                                                                                                                                                                                                                              |           |           |   |           |           |       |                         |       |       |       |
|-------|---|--------------------------------------------------------------------------------------------------------------------------------------------------------------------------------------------------------------------------------------------------------------------------------------------------------------------------------------------------------------------------------------------------------------------------------------------------------------------------------------------------------------------------------------------------------------------------------------------------------------------------------------------------------------------------------------------------------------------------------------------------------------------------------------------------------------------------------------------------------------------------------------------------------------------------------------------------------------------------------------------------------------------------------------------------------------------------------------------------------------------------------------------------------------------------------------------------------------------------------------------------------------------------------------------------------------------------------------------------------------------------------------------------------------------------------------------------------------------------------------------------------------------------------------------------------------------------------------------------------------------------------------------------------------------------------------------------------------------------------------------------------------------------------------------------------------------------------------------------------------------------------------------------------------------------------------------------------------------------------------------------------------------------------------------------------------------------------------------------------------------------------------------------------------------------------------------------------------------------------------------------------------------------------------------------------------------------------------------------------------|-----------|-----------|---|-----------|-----------|-------|-------------------------|-------|-------|-------|
| <hr/> |   |                                                                                                                                                                                                                                                                                                                                                                                                                                                                                                                                                                                                                                                                                                                                                                                                                                                                                                                                                                                                                                                                                                                                                                                                                                                                                                                                                                                                                                                                                                                                                                                                                                                                                                                                                                                                                                                                                                                                                                                                                                                                                                                                                                                                                                                                                                                                                              |           |           |   |           |           |       |                         |       |       |       |
| ITF64 | 1 | (chiusura Sicilia) - n. 858 del 3 febbraio 2022<br>(chiusura Trento) - n. 859 del 3 febbraio 2022 (chiusura Lombardia) - n. 868 del 1 marzo 2022 (chiusura Bolzano)<br>n. 558 del 15 novembre 2018 - n. 559 del 29 novembre 2018 - n. 560 del 7 dicembre 2018 - n. 564 del 27 dicembre 2018 (Toscana) - n. 568 del 16 gennaio 2019 (Liguria) - n. 575 dell'8 febbraio 2019 - n. 593 del 17 maggio 2019 (Liguria) - n. 601 del 1 agosto 2019 - n. 606 del 18 settembre 2019 - n. 613 del 5 novembre 2019 - n. 694 del 18 agosto 2020 (Marche) - n. 696 del 18 agosto 2020 - n. 727 del 28 dicembre 2020 - n. 769 del 16 aprile 2021 (Veneto) - n. 799 del 1° ottobre 2021 (Veneto) - n. 833 del 12 gennaio 2022 (chiusura Calabria) - n. 834 del 12 gennaio 2022 (chiusura Sardegna) - n. 835 del 12 gennaio 2022 (chiusura Liguria) - n. 836 del 12 gennaio 2022 (chiusura Veneto) - n. 837 del 12 gennaio 2022 (chiusura Friuli-Venezia Giulia) - n. 838 del 12 gennaio 2022 (chiusura Toscana) - n. 840 del 12 gennaio 2022 (chiusura Emilia-Romagna) - n. 850 del 3 febbraio 2022 (chiusura Lazio) - n. 857 del 3 febbraio 2022 (chiusura Sicilia) - n. 858 del 3 febbraio 2022 (chiusura Trento) - n. 859 del 3 febbraio 2022 (chiusura Lombardia) - n. 868 del 1 marzo 2022 (chiusura Bolzano)<br>n. 558 del 15 novembre 2018 - n. 559 del 29 novembre 2018 - n. 560 del 7 dicembre 2018 - n. 564 del 27 dicembre 2018 (Toscana) - n. 568 del 16 gennaio 2019 (Liguria) - n. 575 dell'8 febbraio 2019 - n. 593 del 17 maggio 2019 (Liguria) - n. 601 del 1 agosto 2019 - n. 606 del 18 settembre 2019 - n. 613 del 5 novembre 2019 - n. 694 del 18 agosto 2020 (Marche) - n. 696 del 18 agosto 2020 - n. 727 del 28 dicembre 2020 - n. 769 del 16 aprile 2021 (Veneto) - n. 799 del 1° ottobre 2021 (Veneto) - n. 833 del 12 gennaio 2022 (chiusura Calabria) - n. 834 del 12 gennaio 2022 (chiusura Sardegna) - n. 835 del 12 gennaio 2022 (chiusura Liguria) - n. 836 del 12 gennaio 2022 (chiusura Veneto) - n. 837 del 12 gennaio 2022 (chiusura Friuli-Venezia Giulia) - n. 838 del 12 gennaio 2022 (chiusura Toscana) - n. 840 del 12 gennaio 2022 (chiusura Emilia-Romagna) - n. 850 del 3 febbraio 2022 (chiusura Lazio) - n. 857 del 3 febbraio 2022 (chiusura Sicilia) - n. 858 del 3 febbraio 2022 (chiusura Trento) - n. 859 del 3 febbraio | 10/5/2018 | 11/5/2018 | 3 | 11/8/2018 | 11/8/2021 | ##### | 119,622,517,471,347,390 | ##### | .46 € | .66 € |
|       |   |                                                                                                                                                                                                                                                                                                                                                                                                                                                                                                                                                                                                                                                                                                                                                                                                                                                                                                                                                                                                                                                                                                                                                                                                                                                                                                                                                                                                                                                                                                                                                                                                                                                                                                                                                                                                                                                                                                                                                                                                                                                                                                                                                                                                                                                                                                                                                              |           |           |   |           |           |       |                         |       |       |       |
| ITH10 | 1 | (chiusura Sicilia) - n. 858 del 3 febbraio 2022<br>(chiusura Trento) - n. 859 del 3 febbraio 2022 (chiusura Lombardia) - n. 868 del 1 marzo 2022 (chiusura Bolzano)<br>n. 558 del 15 novembre 2018 - n. 559 del 29 novembre 2018 - n. 560 del 7 dicembre 2018 - n. 564 del 27 dicembre 2018 (Toscana) - n. 568 del 16 gennaio 2019 (Liguria) - n. 575 dell'8 febbraio 2019 - n. 593 del 17 maggio 2019 (Liguria) - n. 601 del 1 agosto 2019 - n. 606 del 18 settembre 2019 - n. 613 del 5 novembre 2019 - n. 694 del 18 agosto 2020 (Marche) - n. 696 del 18 agosto 2020 - n. 727 del 28 dicembre 2020 - n. 769 del 16 aprile 2021 (Veneto) - n. 799 del 1° ottobre 2021 (Veneto) - n. 833 del 12 gennaio 2022 (chiusura Calabria) - n. 834 del 12 gennaio 2022 (chiusura Sardegna) - n. 835 del 12 gennaio 2022 (chiusura Liguria) - n. 836 del 12 gennaio 2022 (chiusura Veneto) - n. 837 del 12 gennaio 2022 (chiusura Friuli-Venezia Giulia) - n. 838 del 12 gennaio 2022 (chiusura Toscana) - n. 840 del 12 gennaio 2022 (chiusura Emilia-Romagna) - n. 850 del 3 febbraio 2022 (chiusura Lazio) - n. 857 del 3 febbraio 2022 (chiusura Sicilia) - n. 858 del 3 febbraio 2022 (chiusura Trento) - n. 859 del 3 febbraio                                                                                                                                                                                                                                                                                                                                                                                                                                                                                                                                                                                                                                                                                                                                                                                                                                                                                                                                                                                                                                                                                                                                 | 10/5/2018 | 11/5/2018 | 3 | 11/8/2018 | 11/8/2021 | ##### | 119,622,517,471,347,390 | ##### | .46 € | .66 € |
|       |   |                                                                                                                                                                                                                                                                                                                                                                                                                                                                                                                                                                                                                                                                                                                                                                                                                                                                                                                                                                                                                                                                                                                                                                                                                                                                                                                                                                                                                                                                                                                                                                                                                                                                                                                                                                                                                                                                                                                                                                                                                                                                                                                                                                                                                                                                                                                                                              |           |           |   |           |           |       |                         |       |       |       |
|       |   |                                                                                                                                                                                                                                                                                                                                                                                                                                                                                                                                                                                                                                                                                                                                                                                                                                                                                                                                                                                                                                                                                                                                                                                                                                                                                                                                                                                                                                                                                                                                                                                                                                                                                                                                                                                                                                                                                                                                                                                                                                                                                                                                                                                                                                                                                                                                                              |           |           |   |           |           |       |                         |       | <hr/> |       |

|       |   |                                                                                                                                                                                                                                                                                                                                                                                                                                                                                                                                                                                                                                                                                                                                                                                                                                                                                                                                                                                                                                                                                                                                                                                                                                                                                                                                                                                                                                                                                                                                                                                                                                                                                                                                                                                                                                                                                                                                                                                                                                                                                                                                                                                                                                                                                                                                        |           |           |   |           |           |       |                         |       |       |  |
|-------|---|----------------------------------------------------------------------------------------------------------------------------------------------------------------------------------------------------------------------------------------------------------------------------------------------------------------------------------------------------------------------------------------------------------------------------------------------------------------------------------------------------------------------------------------------------------------------------------------------------------------------------------------------------------------------------------------------------------------------------------------------------------------------------------------------------------------------------------------------------------------------------------------------------------------------------------------------------------------------------------------------------------------------------------------------------------------------------------------------------------------------------------------------------------------------------------------------------------------------------------------------------------------------------------------------------------------------------------------------------------------------------------------------------------------------------------------------------------------------------------------------------------------------------------------------------------------------------------------------------------------------------------------------------------------------------------------------------------------------------------------------------------------------------------------------------------------------------------------------------------------------------------------------------------------------------------------------------------------------------------------------------------------------------------------------------------------------------------------------------------------------------------------------------------------------------------------------------------------------------------------------------------------------------------------------------------------------------------------|-----------|-----------|---|-----------|-----------|-------|-------------------------|-------|-------|--|
| ITH20 | 1 | 2022 (chiusura Lombardia) - n. 868 del 1 marzo 2022 (chiusura Bolzano)<br>n. 558 del 15 novembre 2018 - n. 559 del 29 novembre 2018 - n. 560 del 7 dicembre 2018 - n. 564 del 27 dicembre 2018 (Toscana) - n. 568 del 16 gennaio 2019 (Liguria) - n. 575 dell'8 febbraio 2019 - n. 593 del 17 maggio 2019 (Liguria) - n. 601 del 1 agosto 2019 - n. 606 del 18 settembre 2019 - n. 613 del 5 novembre 2019 - n. 694 del 18 agosto 2020 (Marche) - n. 696 del 18 agosto 2020 - n. 727 del 28 dicembre 2020 - n. 769 del 16 aprile 2021 (Veneto) - n. 799 del 1° ottobre 2021 (Veneto) - n. 833 del 12 gennaio 2022 (chiusura Calabria) - n. 834 del 12 gennaio 2022 (chiusura Sardegna) - n. 835 del 12 gennaio 2022 (chiusura Liguria) - n. 836 del 12 gennaio 2022 (chiusura Veneto) - n. 837 del 12 gennaio 2022 (chiusura Friuli-Venezia Giulia) - n. 838 del 12 gennaio 2022 (chiusura Toscana) - n. 840 del 12 gennaio 2022 (chiusura Emilia-Romagna) - n. 850 del 3 febbraio 2022 (chiusura Lazio) - n. 857 del 3 febbraio 2022 (chiusura Sicilia) - n. 858 del 3 febbraio 2022 (chiusura Trento) - n. 859 del 3 febbraio 2022 (chiusura Lombardia) - n. 868 del 1 marzo 2022 (chiusura Bolzano)<br>n. 558 del 15 novembre 2018 - n. 559 del 29 novembre 2018 - n. 560 del 7 dicembre 2018 - n. 564 del 27 dicembre 2018 (Toscana) - n. 568 del 16 gennaio 2019 (Liguria) - n. 575 dell'8 febbraio 2019 - n. 593 del 17 maggio 2019 (Liguria) - n. 601 del 1 agosto 2019 - n. 606 del 18 settembre 2019 - n. 613 del 5 novembre 2019 - n. 694 del 18 agosto 2020 (Marche) - n. 696 del 18 agosto 2020 - n. 727 del 28 dicembre 2020 - n. 769 del 16 aprile 2021 (Veneto) - n. 799 del 1° ottobre 2021 (Veneto) - n. 833 del 12 gennaio 2022 (chiusura Calabria) - n. 834 del 12 gennaio 2022 (chiusura Sardegna) - n. 835 del 12 gennaio 2022 (chiusura Liguria) - n. 836 del 12 gennaio 2022 (chiusura Veneto) - n. 837 del 12 gennaio 2022 (chiusura Friuli-Venezia Giulia) - n. 838 del 12 gennaio 2022 (chiusura Toscana) - n. 840 del 12 gennaio 2022 (chiusura Emilia-Romagna) - n. 850 del 3 febbraio 2022 (chiusura Lazio) - n. 857 del 3 febbraio 2022 (chiusura Sicilia) - n. 858 del 3 febbraio 2022 (chiusura Trento) - n. 859 del 3 febbraio 2022 (chiusura Lombardia) - n. 868 del 1 marzo 2022 (chiusura Bolzano) | 10/5/2018 | 11/5/2018 | 3 | 11/8/2018 | 11/8/2021 | ##### | 119,622,517,471,347,390 | ##### |       |  |
|       |   |                                                                                                                                                                                                                                                                                                                                                                                                                                                                                                                                                                                                                                                                                                                                                                                                                                                                                                                                                                                                                                                                                                                                                                                                                                                                                                                                                                                                                                                                                                                                                                                                                                                                                                                                                                                                                                                                                                                                                                                                                                                                                                                                                                                                                                                                                                                                        |           |           |   |           |           | ##### |                         | .46 € | .66 € |  |
| ITH33 | 1 | 2022 (chiusura Lombardia) - n. 868 del 1 marzo 2022 (chiusura Bolzano)<br>n. 558 del 15 novembre 2018 - n. 559 del 29 novembre 2018 - n. 560 del 7 dicembre 2018 - n. 564 del 27 dicembre 2018 (Toscana) - n. 568 del 16 gennaio 2019 (Liguria) - n. 575 dell'8 febbraio 2019 - n. 593 del 17 maggio 2019 (Liguria) - n. 601 del 1 agosto 2019 - n. 606 del 18 settembre 2019 - n. 613 del 5 novembre 2019 - n. 694 del 18 agosto 2020 (Marche) - n. 696 del 18 agosto 2020 - n. 727 del 28 dicembre 2020 - n. 769 del 16 aprile 2021 (Veneto) - n. 799 del 1° ottobre 2021 (Veneto) - n. 833 del 12 gennaio 2022 (chiusura Calabria) - n. 834 del 12 gennaio 2022 (chiusura Sardegna) - n. 835 del 12 gennaio 2022 (chiusura Liguria) - n. 836 del 12 gennaio 2022 (chiusura Veneto) - n. 837 del 12 gennaio 2022 (chiusura Friuli-Venezia Giulia) - n. 838 del 12 gennaio 2022 (chiusura Toscana) - n. 840 del 12 gennaio 2022 (chiusura Emilia-Romagna) - n. 850 del 3 febbraio 2022 (chiusura Lazio) - n. 857 del 3 febbraio 2022 (chiusura Sicilia) - n. 858 del 3 febbraio 2022 (chiusura Trento) - n. 859 del 3 febbraio 2022 (chiusura Lombardia) - n. 868 del 1 marzo 2022 (chiusura Bolzano)                                                                                                                                                                                                                                                                                                                                                                                                                                                                                                                                                                                                                                                                                                                                                                                                                                                                                                                                                                                                                                                                                                                                 | 10/5/2018 | 11/5/2018 | 3 | 11/8/2018 | 11/8/2021 | ##### | 119,622,517,471,347,390 | ##### |       |  |
|       |   |                                                                                                                                                                                                                                                                                                                                                                                                                                                                                                                                                                                                                                                                                                                                                                                                                                                                                                                                                                                                                                                                                                                                                                                                                                                                                                                                                                                                                                                                                                                                                                                                                                                                                                                                                                                                                                                                                                                                                                                                                                                                                                                                                                                                                                                                                                                                        |           |           |   |           |           | ##### |                         | .46 € | .66 € |  |

|       |   |                                                                                                                                                                                                                                                                                                                                                                                                                                                                                                                                                                                                                                                                                                                                                                                                                                                                                                                                                                                                                                                                                                                              |           |           |   |           |           |       |             |             |       |       |       |
|-------|---|------------------------------------------------------------------------------------------------------------------------------------------------------------------------------------------------------------------------------------------------------------------------------------------------------------------------------------------------------------------------------------------------------------------------------------------------------------------------------------------------------------------------------------------------------------------------------------------------------------------------------------------------------------------------------------------------------------------------------------------------------------------------------------------------------------------------------------------------------------------------------------------------------------------------------------------------------------------------------------------------------------------------------------------------------------------------------------------------------------------------------|-----------|-----------|---|-----------|-----------|-------|-------------|-------------|-------|-------|-------|
| ITH36 | 1 | n. 558 del 15 novembre 2018 - n. 559 del 29 novembre 2018 - n. 560 del 7 dicembre 2018 - n. 564 del 27 dicembre 2018 (Toscana) - n. 568 del 16 gennaio 2019 (Liguria) - n. 575 dell'8 febbraio 2019 - n. 593 del 17 maggio 2019 (Liguria) - n. 601 del 1 agosto 2019 - n. 606 del 18 settembre 2019 - n. 613 del 5 novembre 2019 - n. 694 del 18 agosto 2020 (Marche) - n. 696 del 18 agosto 2020 - n. 727 del 28 dicembre 2020 - n. 769 del 16 aprile 2021 (Veneto) - n. 799 del 1° ottobre 2021 (Veneto) - n. 833 del 12 gennaio 2022 (chiusura Calabria) - n. 834 del 12 gennaio 2022 (chiusura Sardegna) - n. 835 del 12 gennaio 2022 (chiusura Liguria) - n. 836 del 12 gennaio 2022 (chiusura Veneto) - n. 837 del 12 gennaio 2022 (chiusura Friuli-Venezia Giulia) - n. 838 del 12 gennaio 2022 (chiusura Toscana) - n. 840 del 12 gennaio 2022 (chiusura Emilia-Romagna) - n. 850 del 3 febbraio 2022 (chiusura Lazio) - n. 857 del 3 febbraio 2022 (chiusura Sicilia) - n. 858 del 3 febbraio 2022 (chiusura Trento) - n. 859 del 3 febbraio 2022 (chiusura Lombardia) - n. 868 del 1 marzo 2022 (chiusura Bolzano) | 10/5/2018 | 11/5/2018 | 3 | 11/8/2018 | 11/8/2021 | ##### | 119,622,517 | 471,347,390 | ##### | .46 € | .66 € |
| ITH37 | 1 | n. 558 del 15 novembre 2018 - n. 559 del 29 novembre 2018 - n. 560 del 7 dicembre 2018 - n. 564 del 27 dicembre 2018 (Toscana) - n. 568 del 16 gennaio 2019 (Liguria) - n. 575 dell'8 febbraio 2019 - n. 593 del 17 maggio 2019 (Liguria) - n. 601 del 1 agosto 2019 - n. 606 del 18 settembre 2019 - n. 613 del 5 novembre 2019 - n. 694 del 18 agosto 2020 (Marche) - n. 696 del 18 agosto 2020 - n. 727 del 28 dicembre 2020 - n. 769 del 16 aprile 2021 (Veneto) - n. 799 del 1° ottobre 2021 (Veneto) - n. 833 del 12 gennaio 2022 (chiusura Calabria) - n. 834 del 12 gennaio 2022 (chiusura Sardegna) - n. 835 del 12 gennaio 2022 (chiusura Liguria) - n. 836 del 12 gennaio 2022 (chiusura Veneto) - n. 837 del 12 gennaio 2022 (chiusura Friuli-Venezia Giulia) - n. 838 del 12 gennaio 2022 (chiusura Toscana) - n. 840 del 12 gennaio 2022 (chiusura Emilia-Romagna) - n. 850 del 3 febbraio 2022 (chiusura Lazio) - n. 857 del 3 febbraio 2022 (chiusura Sicilia) - n. 858 del 3 febbraio 2022 (chiusura Trento) - n. 859 del 3 febbraio 2022 (chiusura Lombardia) - n. 868 del 1 marzo 2022 (chiusura Bolzano) | 10/5/2018 | 11/5/2018 | 3 | 11/8/2018 | 11/8/2021 | ##### | 119,622,517 | 471,347,390 | ##### | .46 € | .66 € |
| ITH34 | 1 | n. 558 del 15 novembre 2018 - n. 559 del 29 novembre 2018 - n. 560 del 7 dicembre                                                                                                                                                                                                                                                                                                                                                                                                                                                                                                                                                                                                                                                                                                                                                                                                                                                                                                                                                                                                                                            | 10/5/2018 | 11/5/2018 | 3 | 11/8/2018 | 11/8/2021 | ##### | 119,622,517 | 471,347,390 | ##### | .46 € | .66 € |

|                                                                                                                                                                                                                                                                                                                                                                                                                                                                                                                                                                                                                                                                                                                                                                                                                                                                                                                                                                                                                                                                                                                                                                                                                                                                                                                                                                                                                                                                                                                                                                                                                                                                                                                                                                                                                                                                                                                                                                                                                                                                                                                                                                                                                                                                                                                                                                                                                                                                                                                                                                                                                       |   |           |           |   |           |           |       |                         |       |
|-----------------------------------------------------------------------------------------------------------------------------------------------------------------------------------------------------------------------------------------------------------------------------------------------------------------------------------------------------------------------------------------------------------------------------------------------------------------------------------------------------------------------------------------------------------------------------------------------------------------------------------------------------------------------------------------------------------------------------------------------------------------------------------------------------------------------------------------------------------------------------------------------------------------------------------------------------------------------------------------------------------------------------------------------------------------------------------------------------------------------------------------------------------------------------------------------------------------------------------------------------------------------------------------------------------------------------------------------------------------------------------------------------------------------------------------------------------------------------------------------------------------------------------------------------------------------------------------------------------------------------------------------------------------------------------------------------------------------------------------------------------------------------------------------------------------------------------------------------------------------------------------------------------------------------------------------------------------------------------------------------------------------------------------------------------------------------------------------------------------------------------------------------------------------------------------------------------------------------------------------------------------------------------------------------------------------------------------------------------------------------------------------------------------------------------------------------------------------------------------------------------------------------------------------------------------------------------------------------------------------|---|-----------|-----------|---|-----------|-----------|-------|-------------------------|-------|
| <p>2018 - n. 564 del 27 dicembre 2018<br/> (Toscana) - n. 568 del 16 gennaio 2019<br/> (Liguria) - n. 575 dell'8 febbraio 2019 - n. 593<br/> del 17 maggio 2019 (Liguria) - n. 601 del 1<br/> agosto 2019 - n. 606 del 18 settembre 2019 -<br/> n. 613 del 5 novembre 2019 - n. 694 del 18<br/> agosto 2020 (Marche) - n. 696 del 18 agosto<br/> 2020 - n. 727 del 28 dicembre 2020 - n. 769<br/> del 16 aprile 2021 (Veneto) - n. 799 del 1°<br/> ottobre 2021 (Veneto) - n. 833 del 12<br/> gennaio 2022 (chiusura Calabria) - n. 834 del<br/> 12 gennaio 2022 (chiusura Sardegna) - n.<br/> 835 del 12 gennaio 2022 (chiusura Liguria) -<br/> n. 836 del 12 gennaio 2022 (chiusura<br/> Veneto) - n. 837 del 12 gennaio 2022<br/> (chiusura Friuli-Venezia Giulia) - n. 838 del<br/> 12 gennaio 2022 (chiusura Toscana) - n. 840<br/> del 12 gennaio 2022 (chiusura Emilia-<br/> Romagna) - n. 850 del 3 febbraio 2022<br/> (chiusura Lazio) - n. 857 del 3 febbraio 2022<br/> (chiusura Sicilia) - n. 858 del 3 febbraio 2022<br/> (chiusura Trento) - n. 859 del 3 febbraio<br/> 2022 (chiusura Lombardia) - n. 868 del 1<br/> marzo 2022 (chiusura Bolzano)<br/> n. 558 del 15 novembre 2018 - n. 559 del 29<br/> novembre 2018 - n. 560 del 7 dicembre<br/> 2018 - n. 564 del 27 dicembre 2018<br/> (Toscana) - n. 568 del 16 gennaio 2019<br/> (Liguria) - n. 575 dell'8 febbraio 2019 - n. 593<br/> del 17 maggio 2019 (Liguria) - n. 601 del 1<br/> agosto 2019 - n. 606 del 18 settembre 2019 -<br/> n. 613 del 5 novembre 2019 - n. 694 del 18<br/> agosto 2020 (Marche) - n. 696 del 18 agosto<br/> 2020 - n. 727 del 28 dicembre 2020 - n. 769<br/> del 16 aprile 2021 (Veneto) - n. 799 del 1°<br/> ottobre 2021 (Veneto) - n. 833 del 12<br/> gennaio 2022 (chiusura Calabria) - n. 834 del<br/> 12 gennaio 2022 (chiusura Sardegna) - n.<br/> 835 del 12 gennaio 2022 (chiusura Liguria) -<br/> n. 836 del 12 gennaio 2022 (chiusura<br/> Veneto) - n. 837 del 12 gennaio 2022<br/> (chiusura Friuli-Venezia Giulia) - n. 838 del<br/> 12 gennaio 2022 (chiusura Toscana) - n. 840<br/> del 12 gennaio 2022 (chiusura Emilia-<br/> Romagna) - n. 850 del 3 febbraio 2022<br/> (chiusura Lazio) - n. 857 del 3 febbraio 2022<br/> (chiusura Sicilia) - n. 858 del 3 febbraio 2022<br/> (chiusura Trento) - n. 859 del 3 febbraio<br/> 2022 (chiusura Lombardia) - n. 868 del 1<br/> marzo 2022 (chiusura Bolzano)<br/> n. 558 del 15 novembre 2018 - n. 559 del 29<br/> novembre 2018 - n. 560 del 7 dicembre<br/> 2018 - n. 564 del 27 dicembre 2018<br/> (Toscana) - n. 568 del 16 gennaio 2019</p> |   |           |           |   |           |           |       |                         |       |
| ITH35                                                                                                                                                                                                                                                                                                                                                                                                                                                                                                                                                                                                                                                                                                                                                                                                                                                                                                                                                                                                                                                                                                                                                                                                                                                                                                                                                                                                                                                                                                                                                                                                                                                                                                                                                                                                                                                                                                                                                                                                                                                                                                                                                                                                                                                                                                                                                                                                                                                                                                                                                                                                                 | 1 | 10/5/2018 | 11/5/2018 | 3 | 11/8/2018 | 11/8/2021 | ##### | 119,622,517,471,347,390 |       |
|                                                                                                                                                                                                                                                                                                                                                                                                                                                                                                                                                                                                                                                                                                                                                                                                                                                                                                                                                                                                                                                                                                                                                                                                                                                                                                                                                                                                                                                                                                                                                                                                                                                                                                                                                                                                                                                                                                                                                                                                                                                                                                                                                                                                                                                                                                                                                                                                                                                                                                                                                                                                                       |   |           |           |   |           |           | ##### | .46 €                   | .66 € |
| ITH32                                                                                                                                                                                                                                                                                                                                                                                                                                                                                                                                                                                                                                                                                                                                                                                                                                                                                                                                                                                                                                                                                                                                                                                                                                                                                                                                                                                                                                                                                                                                                                                                                                                                                                                                                                                                                                                                                                                                                                                                                                                                                                                                                                                                                                                                                                                                                                                                                                                                                                                                                                                                                 | 1 | 10/5/2018 | 11/5/2018 | 3 | 11/8/2018 | 11/8/2021 | ##### | 119,622,517,471,347,390 |       |
|                                                                                                                                                                                                                                                                                                                                                                                                                                                                                                                                                                                                                                                                                                                                                                                                                                                                                                                                                                                                                                                                                                                                                                                                                                                                                                                                                                                                                                                                                                                                                                                                                                                                                                                                                                                                                                                                                                                                                                                                                                                                                                                                                                                                                                                                                                                                                                                                                                                                                                                                                                                                                       |   |           |           |   |           |           | ##### | .46 €                   | .66 € |

[illegible]



|                                                                                                                                                                                                                                                                                                                                                                                                                                                                                                                                                                                                                                                                                                                                                                                                                                                                                                                                                                                                                                                                                                                                                                                                                                                                                                                                                                                                                                                                                                                                                                                                                                                                                                                                                                                                                                                                                                                                                                                                                                                                                                                                                                                                                                                                                                                                                                        |   |           |           |   |           |           |       |                         |       |
|------------------------------------------------------------------------------------------------------------------------------------------------------------------------------------------------------------------------------------------------------------------------------------------------------------------------------------------------------------------------------------------------------------------------------------------------------------------------------------------------------------------------------------------------------------------------------------------------------------------------------------------------------------------------------------------------------------------------------------------------------------------------------------------------------------------------------------------------------------------------------------------------------------------------------------------------------------------------------------------------------------------------------------------------------------------------------------------------------------------------------------------------------------------------------------------------------------------------------------------------------------------------------------------------------------------------------------------------------------------------------------------------------------------------------------------------------------------------------------------------------------------------------------------------------------------------------------------------------------------------------------------------------------------------------------------------------------------------------------------------------------------------------------------------------------------------------------------------------------------------------------------------------------------------------------------------------------------------------------------------------------------------------------------------------------------------------------------------------------------------------------------------------------------------------------------------------------------------------------------------------------------------------------------------------------------------------------------------------------------------|---|-----------|-----------|---|-----------|-----------|-------|-------------------------|-------|
| <p>agosto 2019 - n. 606 del 18 settembre 2019 - n. 613 del 5 novembre 2019 - n. 694 del 18 agosto 2020 (Marche) - n. 696 del 18 agosto 2020 - n. 727 del 28 dicembre 2020 - n. 769 del 16 aprile 2021 (Veneto) - n. 799 del 1° ottobre 2021 (Veneto) - n. 833 del 12 gennaio 2022 (chiusura Calabria) - n. 834 del 12 gennaio 2022 (chiusura Sardegna) - n. 835 del 12 gennaio 2022 (chiusura Liguria) - n. 836 del 12 gennaio 2022 (chiusura Veneto) - n. 837 del 12 gennaio 2022 (chiusura Friuli-Venezia Giulia) - n. 838 del 12 gennaio 2022 (chiusura Toscana) - n. 840 del 12 gennaio 2022 (chiusura Emilia-Romagna) - n. 850 del 3 febbraio 2022 (chiusura Lazio) - n. 857 del 3 febbraio 2022 (chiusura Sicilia) - n. 858 del 3 febbraio 2022 (chiusura Trento) - n. 859 del 3 febbraio 2022 (chiusura Lombardia) - n. 868 del 1 marzo 2022 (chiusura Bolzano)</p> <p>n. 558 del 15 novembre 2018 - n. 559 del 29 novembre 2018 - n. 560 del 7 dicembre 2018 - n. 564 del 27 dicembre 2018 (Toscana) - n. 568 del 16 gennaio 2019 (Liguria) - n. 575 dell'8 febbraio 2019 - n. 593 del 17 maggio 2019 (Liguria) - n. 601 del 1 agosto 2019 - n. 606 del 18 settembre 2019 - n. 613 del 5 novembre 2019 - n. 694 del 18 agosto 2020 (Marche) - n. 696 del 18 agosto 2020 - n. 727 del 28 dicembre 2020 - n. 769 del 16 aprile 2021 (Veneto) - n. 799 del 1° ottobre 2021 (Veneto) - n. 833 del 12 gennaio 2022 (chiusura Calabria) - n. 834 del 12 gennaio 2022 (chiusura Sardegna) - n. 835 del 12 gennaio 2022 (chiusura Liguria) - n. 836 del 12 gennaio 2022 (chiusura Veneto) - n. 837 del 12 gennaio 2022 (chiusura Friuli-Venezia Giulia) - n. 838 del 12 gennaio 2022 (chiusura Toscana) - n. 840 del 12 gennaio 2022 (chiusura Emilia-Romagna) - n. 850 del 3 febbraio 2022 (chiusura Lazio) - n. 857 del 3 febbraio 2022 (chiusura Sicilia) - n. 858 del 3 febbraio 2022 (chiusura Trento) - n. 859 del 3 febbraio 2022 (chiusura Lombardia) - n. 868 del 1 marzo 2022 (chiusura Bolzano)</p> <p>n. 558 del 15 novembre 2018 - n. 559 del 29 novembre 2018 - n. 560 del 7 dicembre 2018 - n. 564 del 27 dicembre 2018 (Toscana) - n. 568 del 16 gennaio 2019 (Liguria) - n. 575 dell'8 febbraio 2019 - n. 593 del 17 maggio 2019 (Liguria) - n. 601 del 1 agosto 2019 - n. 606 del 18 settembre 2019 - n. 613 del 5 novembre 2019 - n. 694 del 18</p> |   |           |           |   |           |           |       |                         |       |
| ITH41                                                                                                                                                                                                                                                                                                                                                                                                                                                                                                                                                                                                                                                                                                                                                                                                                                                                                                                                                                                                                                                                                                                                                                                                                                                                                                                                                                                                                                                                                                                                                                                                                                                                                                                                                                                                                                                                                                                                                                                                                                                                                                                                                                                                                                                                                                                                                                  | 1 | 10/5/2018 | 11/5/2018 | 3 | 11/8/2018 | 11/8/2021 | ##### | 119,622,517,471,347,390 |       |
|                                                                                                                                                                                                                                                                                                                                                                                                                                                                                                                                                                                                                                                                                                                                                                                                                                                                                                                                                                                                                                                                                                                                                                                                                                                                                                                                                                                                                                                                                                                                                                                                                                                                                                                                                                                                                                                                                                                                                                                                                                                                                                                                                                                                                                                                                                                                                                        |   |           |           |   |           |           | ##### | .46 €                   | .66 € |
| ITH44                                                                                                                                                                                                                                                                                                                                                                                                                                                                                                                                                                                                                                                                                                                                                                                                                                                                                                                                                                                                                                                                                                                                                                                                                                                                                                                                                                                                                                                                                                                                                                                                                                                                                                                                                                                                                                                                                                                                                                                                                                                                                                                                                                                                                                                                                                                                                                  | 1 | 10/5/2018 | 11/5/2018 | 3 | 11/8/2018 | 11/8/2021 | ##### | 119,622,517,471,347,390 |       |
|                                                                                                                                                                                                                                                                                                                                                                                                                                                                                                                                                                                                                                                                                                                                                                                                                                                                                                                                                                                                                                                                                                                                                                                                                                                                                                                                                                                                                                                                                                                                                                                                                                                                                                                                                                                                                                                                                                                                                                                                                                                                                                                                                                                                                                                                                                                                                                        |   |           |           |   |           |           | ##### | .46 €                   | .66 € |

|                                                                                                                                                                                                                                                                                                                                                                                                                                                                                                                                                                                                                                                                                                                                                                                                                                                                                                                                                                                                                                                                                                                                                                                                                                                                                                                                                                                                                                                                                                                                                                                                                                                                                                                                                                                                                                                                                                                                                                                                                                                                                                                                                                                                                                                                                                                                                                        |   |           |           |   |           |           |       |                         |       |       |       |
|------------------------------------------------------------------------------------------------------------------------------------------------------------------------------------------------------------------------------------------------------------------------------------------------------------------------------------------------------------------------------------------------------------------------------------------------------------------------------------------------------------------------------------------------------------------------------------------------------------------------------------------------------------------------------------------------------------------------------------------------------------------------------------------------------------------------------------------------------------------------------------------------------------------------------------------------------------------------------------------------------------------------------------------------------------------------------------------------------------------------------------------------------------------------------------------------------------------------------------------------------------------------------------------------------------------------------------------------------------------------------------------------------------------------------------------------------------------------------------------------------------------------------------------------------------------------------------------------------------------------------------------------------------------------------------------------------------------------------------------------------------------------------------------------------------------------------------------------------------------------------------------------------------------------------------------------------------------------------------------------------------------------------------------------------------------------------------------------------------------------------------------------------------------------------------------------------------------------------------------------------------------------------------------------------------------------------------------------------------------------|---|-----------|-----------|---|-----------|-----------|-------|-------------------------|-------|-------|-------|
| <p>agosto 2020 (Marche) - n. 696 del 18 agosto 2020 - n. 727 del 28 dicembre 2020 - n. 769 del 16 aprile 2021 (Veneto) - n. 799 del 1° ottobre 2021 (Veneto) - n. 833 del 12 gennaio 2022 (chiusura Calabria) - n. 834 del 12 gennaio 2022 (chiusura Sardegna) - n. 835 del 12 gennaio 2022 (chiusura Liguria) - n. 836 del 12 gennaio 2022 (chiusura Veneto) - n. 837 del 12 gennaio 2022 (chiusura Friuli-Venezia Giulia) - n. 838 del 12 gennaio 2022 (chiusura Toscana) - n. 840 del 12 gennaio 2022 (chiusura Emilia-Romagna) - n. 850 del 3 febbraio 2022 (chiusura Lazio) - n. 857 del 3 febbraio 2022 (chiusura Sicilia) - n. 858 del 3 febbraio 2022 (chiusura Trento) - n. 859 del 3 febbraio 2022 (chiusura Lombardia) - n. 868 del 1 marzo 2022 (chiusura Bolzano)</p> <p>n. 558 del 15 novembre 2018 - n. 559 del 29 novembre 2018 - n. 560 del 7 dicembre 2018 - n. 564 del 27 dicembre 2018 (Toscana) - n. 568 del 16 gennaio 2019 (Liguria) - n. 575 dell'8 febbraio 2019 - n. 593 del 17 maggio 2019 (Liguria) - n. 601 del 1 agosto 2019 - n. 606 del 18 settembre 2019 - n. 613 del 5 novembre 2019 - n. 694 del 18 agosto 2020 (Marche) - n. 696 del 18 agosto 2020 - n. 727 del 28 dicembre 2020 - n. 769 del 16 aprile 2021 (Veneto) - n. 799 del 1° ottobre 2021 (Veneto) - n. 833 del 12 gennaio 2022 (chiusura Calabria) - n. 834 del 12 gennaio 2022 (chiusura Sardegna) - n. 835 del 12 gennaio 2022 (chiusura Liguria) - n. 836 del 12 gennaio 2022 (chiusura Veneto) - n. 837 del 12 gennaio 2022 (chiusura Friuli-Venezia Giulia) - n. 838 del 12 gennaio 2022 (chiusura Toscana) - n. 840 del 12 gennaio 2022 (chiusura Emilia-Romagna) - n. 850 del 3 febbraio 2022 (chiusura Lazio) - n. 857 del 3 febbraio 2022 (chiusura Sicilia) - n. 858 del 3 febbraio 2022 (chiusura Trento) - n. 859 del 3 febbraio 2022 (chiusura Lombardia) - n. 868 del 1 marzo 2022 (chiusura Bolzano)</p> <p>n. 558 del 15 novembre 2018 - n. 559 del 29 novembre 2018 - n. 560 del 7 dicembre 2018 - n. 564 del 27 dicembre 2018 (Toscana) - n. 568 del 16 gennaio 2019 (Liguria) - n. 575 dell'8 febbraio 2019 - n. 593 del 17 maggio 2019 (Liguria) - n. 601 del 1 agosto 2019 - n. 606 del 18 settembre 2019 - n. 613 del 5 novembre 2019 - n. 694 del 18 agosto 2020 (Marche) - n. 696 del 18 agosto 2020 - n. 727 del 28 dicembre 2020 - n. 769</p> |   |           |           |   |           |           |       |                         |       |       |       |
| ITH42                                                                                                                                                                                                                                                                                                                                                                                                                                                                                                                                                                                                                                                                                                                                                                                                                                                                                                                                                                                                                                                                                                                                                                                                                                                                                                                                                                                                                                                                                                                                                                                                                                                                                                                                                                                                                                                                                                                                                                                                                                                                                                                                                                                                                                                                                                                                                                  | 1 | 10/5/2018 | 11/5/2018 | 3 | 11/8/2018 | 11/8/2021 | ##### | 119,622,517,471,347,390 | ##### | .46 € | .66 € |
| ITG2F                                                                                                                                                                                                                                                                                                                                                                                                                                                                                                                                                                                                                                                                                                                                                                                                                                                                                                                                                                                                                                                                                                                                                                                                                                                                                                                                                                                                                                                                                                                                                                                                                                                                                                                                                                                                                                                                                                                                                                                                                                                                                                                                                                                                                                                                                                                                                                  | 1 | 10/5/2018 | 11/5/2018 | 3 | 11/8/2018 | 11/8/2021 | ##### | 119,622,517,471,347,390 | ##### | .46 € | .66 € |

[illegible]

[illegible]

|       |   |                                                                                                                                                                                                                                                                                                                                                                                                                                                                                                                                                                                                                                                                                                                                                                                                                                                                                                                                                                                                                                                                                                                                                                                                                                                                                                  |           |           |   |           |           |       |             |             |
|-------|---|--------------------------------------------------------------------------------------------------------------------------------------------------------------------------------------------------------------------------------------------------------------------------------------------------------------------------------------------------------------------------------------------------------------------------------------------------------------------------------------------------------------------------------------------------------------------------------------------------------------------------------------------------------------------------------------------------------------------------------------------------------------------------------------------------------------------------------------------------------------------------------------------------------------------------------------------------------------------------------------------------------------------------------------------------------------------------------------------------------------------------------------------------------------------------------------------------------------------------------------------------------------------------------------------------|-----------|-----------|---|-----------|-----------|-------|-------------|-------------|
| ITI43 | 1 | 835 del 12 gennaio 2022 (chiusura Liguria) -<br>n. 836 del 12 gennaio 2022 (chiusura<br>Veneto) - n. 837 del 12 gennaio 2022<br>(chiusura Friuli-Venezia Giulia) - n. 838 del<br>12 gennaio 2022 (chiusura Toscana) - n. 840<br>del 12 gennaio 2022 (chiusura Emilia-<br>Romagna) - n. 850 del 3 febbraio 2022<br>(chiusura Lazio) - n. 857 del 3 febbraio 2022<br>(chiusura Sicilia) - n. 858 del 3 febbraio 2022<br>(chiusura Trento) - n. 859 del 3 febbraio<br>2022 (chiusura Lombardia) - n. 868 del 1<br>marzo 2022 (chiusura Bolzano)<br>n. 558 del 15 novembre 2018 - n. 559 del 29<br>novembre 2018 - n. 560 del 7 dicembre<br>2018 - n. 564 del 27 dicembre 2018<br>(Toscana) - n. 568 del 16 gennaio 2019<br>(Liguria) - n. 575 dell'8 febbraio 2019 - n. 593<br>del 17 maggio 2019 (Liguria) - n. 601 del 1<br>agosto 2019 - n. 606 del 18 settembre 2019 -<br>n. 613 del 5 novembre 2019 - n. 694 del 18<br>agosto 2020 (Marche) - n. 696 del 18 agosto<br>2020 - n. 727 del 28 dicembre 2020 - n. 769<br>del 16 aprile 2021 (Veneto) - n. 799 del 1°<br>ottobre 2021 (Veneto) - n. 833 del 12<br>gennaio 2022 (chiusura Calabria) - n. 834 del<br>12 gennaio 2022 (chiusura Sardegna) - n.                                                                                         | 10/5/2018 | 11/5/2018 | 3 | 11/8/2018 | 11/8/2021 | ##### | 119,622,517 | 471,347,390 |
|       |   |                                                                                                                                                                                                                                                                                                                                                                                                                                                                                                                                                                                                                                                                                                                                                                                                                                                                                                                                                                                                                                                                                                                                                                                                                                                                                                  |           |           |   |           |           |       |             | #####       |
| ITI18 | 1 | 835 del 12 gennaio 2022 (chiusura Liguria) -<br>n. 836 del 12 gennaio 2022 (chiusura<br>Veneto) - n. 837 del 12 gennaio 2022<br>(chiusura Friuli-Venezia Giulia) - n. 838 del<br>12 gennaio 2022 (chiusura Toscana) - n. 840<br>del 12 gennaio 2022 (chiusura Emilia-<br>Romagna) - n. 850 del 3 febbraio 2022<br>(chiusura Lazio) - n. 857 del 3 febbraio 2022<br>(chiusura Sicilia) - n. 858 del 3 febbraio 2022<br>(chiusura Trento) - n. 859 del 3 febbraio<br>2022 (chiusura Lombardia) - n. 868 del 1<br>marzo 2022 (chiusura Bolzano)<br>n. 558 del 15 novembre 2018 - n. 559 del 29<br>novembre 2018 - n. 560 del 7 dicembre<br>2018 - n. 564 del 27 dicembre 2018<br>(Toscana) - n. 568 del 16 gennaio 2019<br>(Liguria) - n. 575 dell'8 febbraio 2019 - n. 593<br>del 17 maggio 2019 (Liguria) - n. 601 del 1<br>agosto 2019 - n. 606 del 18 settembre 2019 -<br>n. 613 del 5 novembre 2019 - n. 694 del 18<br>agosto 2020 (Marche) - n. 696 del 18 agosto<br>2020 - n. 727 del 28 dicembre 2020 - n. 769<br>del 16 aprile 2021 (Veneto) - n. 799 del 1°<br>ottobre 2021 (Veneto) - n. 833 del 12<br>gennaio 2022 (chiusura Calabria) - n. 834 del<br>12 gennaio 2022 (chiusura Sardegna) - n.<br>835 del 12 gennaio 2022 (chiusura Liguria) -<br>n. 836 del 12 gennaio 2022 (chiusura | 10/5/2018 | 11/5/2018 | 3 | 11/8/2018 | 11/8/2021 | ##### | 119,622,517 | 471,347,390 |
|       |   |                                                                                                                                                                                                                                                                                                                                                                                                                                                                                                                                                                                                                                                                                                                                                                                                                                                                                                                                                                                                                                                                                                                                                                                                                                                                                                  |           |           |   |           |           |       |             | #####       |

|       |   |                                                                                                                                                                                                                                                                                                                                                                                                                                                                                                                                                                                                                                                                                                                                                                                                                                                                                                                                                                                                                                                                                                                                                                                                                                                                                                                                                                                                                                                                                                                                                                                                                                                                                                                                                                                                                                                                                                                                                                                                                                                                                                                                                                                                                                                                                                                                                    |           |           |   |           |           |       |                         |       |       |       |
|-------|---|----------------------------------------------------------------------------------------------------------------------------------------------------------------------------------------------------------------------------------------------------------------------------------------------------------------------------------------------------------------------------------------------------------------------------------------------------------------------------------------------------------------------------------------------------------------------------------------------------------------------------------------------------------------------------------------------------------------------------------------------------------------------------------------------------------------------------------------------------------------------------------------------------------------------------------------------------------------------------------------------------------------------------------------------------------------------------------------------------------------------------------------------------------------------------------------------------------------------------------------------------------------------------------------------------------------------------------------------------------------------------------------------------------------------------------------------------------------------------------------------------------------------------------------------------------------------------------------------------------------------------------------------------------------------------------------------------------------------------------------------------------------------------------------------------------------------------------------------------------------------------------------------------------------------------------------------------------------------------------------------------------------------------------------------------------------------------------------------------------------------------------------------------------------------------------------------------------------------------------------------------------------------------------------------------------------------------------------------------|-----------|-----------|---|-----------|-----------|-------|-------------------------|-------|-------|-------|
| ITI14 | 1 | Veneto) - n. 837 del 12 gennaio 2022 (chiusura Friuli-Venezia Giulia) - n. 838 del 12 gennaio 2022 (chiusura Toscana) - n. 840 del 12 gennaio 2022 (chiusura Emilia-Romagna) - n. 850 del 3 febbraio 2022 (chiusura Lazio) - n. 857 del 3 febbraio 2022 (chiusura Sicilia) - n. 858 del 3 febbraio 2022 (chiusura Trento) - n. 859 del 3 febbraio 2022 (chiusura Lombardia) - n. 868 del 1 marzo 2022 (chiusura Bolzano)<br>n. 558 del 15 novembre 2018 - n. 559 del 29 novembre 2018 - n. 560 del 7 dicembre 2018 - n. 564 del 27 dicembre 2018 (Toscana) - n. 568 del 16 gennaio 2019 (Liguria) - n. 575 dell'8 febbraio 2019 - n. 593 del 17 maggio 2019 (Liguria) - n. 601 del 1 agosto 2019 - n. 606 del 18 settembre 2019 - n. 613 del 5 novembre 2019 - n. 694 del 18 agosto 2020 (Marche) - n. 696 del 18 agosto 2020 - n. 727 del 28 dicembre 2020 - n. 769 del 16 aprile 2021 (Veneto) - n. 799 del 1° ottobre 2021 (Veneto) - n. 833 del 12 gennaio 2022 (chiusura Calabria) - n. 834 del 12 gennaio 2022 (chiusura Sardegna) - n. 835 del 12 gennaio 2022 (chiusura Liguria) - n. 836 del 12 gennaio 2022 (chiusura Veneto) - n. 837 del 12 gennaio 2022 (chiusura Friuli-Venezia Giulia) - n. 838 del 12 gennaio 2022 (chiusura Toscana) - n. 840 del 12 gennaio 2022 (chiusura Emilia-Romagna) - n. 850 del 3 febbraio 2022 (chiusura Lazio) - n. 857 del 3 febbraio 2022 (chiusura Sicilia) - n. 858 del 3 febbraio 2022 (chiusura Trento) - n. 859 del 3 febbraio 2022 (chiusura Lombardia) - n. 868 del 1 marzo 2022 (chiusura Bolzano)<br>n. 558 del 15 novembre 2018 - n. 559 del 29 novembre 2018 - n. 560 del 7 dicembre 2018 - n. 564 del 27 dicembre 2018 (Toscana) - n. 568 del 16 gennaio 2019 (Liguria) - n. 575 dell'8 febbraio 2019 - n. 593 del 17 maggio 2019 (Liguria) - n. 601 del 1 agosto 2019 - n. 606 del 18 settembre 2019 - n. 613 del 5 novembre 2019 - n. 694 del 18 agosto 2020 (Marche) - n. 696 del 18 agosto 2020 - n. 727 del 28 dicembre 2020 - n. 769 del 16 aprile 2021 (Veneto) - n. 799 del 1° ottobre 2021 (Veneto) - n. 833 del 12 gennaio 2022 (chiusura Calabria) - n. 834 del 12 gennaio 2022 (chiusura Sardegna) - n. 835 del 12 gennaio 2022 (chiusura Liguria) - n. 836 del 12 gennaio 2022 (chiusura Veneto) - n. 837 del 12 gennaio 2022 (chiusura Friuli-Venezia Giulia) - n. 838 del | 10/5/2018 | 11/5/2018 | 3 | 11/8/2018 | 11/8/2021 | ##### | 119,622,517,471,347,390 | ##### | .46 € | .66 € |
|       |   |                                                                                                                                                                                                                                                                                                                                                                                                                                                                                                                                                                                                                                                                                                                                                                                                                                                                                                                                                                                                                                                                                                                                                                                                                                                                                                                                                                                                                                                                                                                                                                                                                                                                                                                                                                                                                                                                                                                                                                                                                                                                                                                                                                                                                                                                                                                                                    |           |           |   |           |           |       |                         |       |       |       |
| ITI1A | 1 | agosto 2020 (Marche) - n. 696 del 18 agosto 2020 - n. 727 del 28 dicembre 2020 - n. 769 del 16 aprile 2021 (Veneto) - n. 799 del 1° ottobre 2021 (Veneto) - n. 833 del 12 gennaio 2022 (chiusura Calabria) - n. 834 del 12 gennaio 2022 (chiusura Sardegna) - n. 835 del 12 gennaio 2022 (chiusura Liguria) - n. 836 del 12 gennaio 2022 (chiusura Veneto) - n. 837 del 12 gennaio 2022 (chiusura Friuli-Venezia Giulia) - n. 838 del                                                                                                                                                                                                                                                                                                                                                                                                                                                                                                                                                                                                                                                                                                                                                                                                                                                                                                                                                                                                                                                                                                                                                                                                                                                                                                                                                                                                                                                                                                                                                                                                                                                                                                                                                                                                                                                                                                              | 10/5/2018 | 11/5/2018 | 3 | 11/8/2018 | 11/8/2021 | ##### | 119,622,517,471,347,390 | ##### | .46 € | .66 € |
|       |   |                                                                                                                                                                                                                                                                                                                                                                                                                                                                                                                                                                                                                                                                                                                                                                                                                                                                                                                                                                                                                                                                                                                                                                                                                                                                                                                                                                                                                                                                                                                                                                                                                                                                                                                                                                                                                                                                                                                                                                                                                                                                                                                                                                                                                                                                                                                                                    |           |           |   |           |           |       |                         |       |       |       |

39

|                                                                                                                                                                                                                                                                                                                                                                                                                                                                                                                                                                                                                                                                                                                                                                                                                                                                                                                                                                                                                                                                                                                                                                                                                                                                                                                                                                                                                                                                                                                                                                                                                                                                                                                                                                                                                                                                                                                                                                                                                                                                                                                                                                                                                                                                                                                                                                          |   |           |           |   |           |           |       |             |             |       |       |       |
|--------------------------------------------------------------------------------------------------------------------------------------------------------------------------------------------------------------------------------------------------------------------------------------------------------------------------------------------------------------------------------------------------------------------------------------------------------------------------------------------------------------------------------------------------------------------------------------------------------------------------------------------------------------------------------------------------------------------------------------------------------------------------------------------------------------------------------------------------------------------------------------------------------------------------------------------------------------------------------------------------------------------------------------------------------------------------------------------------------------------------------------------------------------------------------------------------------------------------------------------------------------------------------------------------------------------------------------------------------------------------------------------------------------------------------------------------------------------------------------------------------------------------------------------------------------------------------------------------------------------------------------------------------------------------------------------------------------------------------------------------------------------------------------------------------------------------------------------------------------------------------------------------------------------------------------------------------------------------------------------------------------------------------------------------------------------------------------------------------------------------------------------------------------------------------------------------------------------------------------------------------------------------------------------------------------------------------------------------------------------------|---|-----------|-----------|---|-----------|-----------|-------|-------------|-------------|-------|-------|-------|
| Romagna) - n. 850 del 3 febbraio 2022<br>(chiusura Lazio) - n. 857 del 3 febbraio 2022<br>(chiusura Sicilia) - n. 858 del 3 febbraio 2022<br>(chiusura Trento) - n. 859 del 3 febbraio 2022 (chiusura Lombardia) - n. 868 del 1 marzo 2022 (chiusura Bolzano)<br>n. 558 del 15 novembre 2018 - n. 559 del 29 novembre 2018 - n. 560 del 7 dicembre 2018 - n. 564 del 27 dicembre 2018<br>(Toscana) - n. 568 del 16 gennaio 2019<br>(Liguria) - n. 575 dell'8 febbraio 2019 - n. 593 del 17 maggio 2019 (Liguria) - n. 601 del 1 agosto 2019 - n. 606 del 18 settembre 2019 - n. 613 del 5 novembre 2019 - n. 694 del 18 agosto 2020 (Marche) - n. 696 del 18 agosto 2020 - n. 727 del 28 dicembre 2020 - n. 769 del 16 aprile 2021 (Veneto) - n. 799 del 1° ottobre 2021 (Veneto) - n. 833 del 12 gennaio 2022 (chiusura Calabria) - n. 834 del 12 gennaio 2022 (chiusura Sardegna) - n. 835 del 12 gennaio 2022 (chiusura Liguria) - n. 836 del 12 gennaio 2022 (chiusura Veneto) - n. 837 del 12 gennaio 2022 (chiusura Friuli-Venezia Giulia) - n. 838 del 12 gennaio 2022 (chiusura Toscana) - n. 840 del 12 gennaio 2022 (chiusura Emilia-Romagna) - n. 850 del 3 febbraio 2022 (chiusura Lazio) - n. 857 del 3 febbraio 2022 (chiusura Sicilia) - n. 858 del 3 febbraio 2022 (chiusura Trento) - n. 859 del 3 febbraio 2022 (chiusura Lombardia) - n. 868 del 1 marzo 2022 (chiusura Bolzano)<br>n. 558 del 15 novembre 2018 - n. 559 del 29 novembre 2018 - n. 560 del 7 dicembre 2018 - n. 564 del 27 dicembre 2018<br>(Toscana) - n. 568 del 16 gennaio 2019<br>(Liguria) - n. 575 dell'8 febbraio 2019 - n. 593 del 17 maggio 2019 (Liguria) - n. 601 del 1 agosto 2019 - n. 606 del 18 settembre 2019 - n. 613 del 5 novembre 2019 - n. 694 del 18 agosto 2020 (Marche) - n. 696 del 18 agosto 2020 - n. 727 del 28 dicembre 2020 - n. 769 del 16 aprile 2021 (Veneto) - n. 799 del 1° ottobre 2021 (Veneto) - n. 833 del 12 gennaio 2022 (chiusura Calabria) - n. 834 del 12 gennaio 2022 (chiusura Sardegna) - n. 835 del 12 gennaio 2022 (chiusura Liguria) - n. 836 del 12 gennaio 2022 (chiusura Veneto) - n. 837 del 12 gennaio 2022 (chiusura Friuli-Venezia Giulia) - n. 838 del 12 gennaio 2022 (chiusura Toscana) - n. 840 del 12 gennaio 2022 (chiusura Emilia-Romagna) - n. 850 del 3 febbraio 2022 (chiusura Lazio) - n. 857 del 3 febbraio 2022 |   |           |           |   |           |           |       |             |             |       |       |       |
| ITI11                                                                                                                                                                                                                                                                                                                                                                                                                                                                                                                                                                                                                                                                                                                                                                                                                                                                                                                                                                                                                                                                                                                                                                                                                                                                                                                                                                                                                                                                                                                                                                                                                                                                                                                                                                                                                                                                                                                                                                                                                                                                                                                                                                                                                                                                                                                                                                    | 1 | 10/5/2018 | 11/5/2018 | 3 | 11/8/2018 | 11/8/2021 | ##### | 119,622,517 | 471,347,390 | ##### | .46 € | .66 € |
| ITI17                                                                                                                                                                                                                                                                                                                                                                                                                                                                                                                                                                                                                                                                                                                                                                                                                                                                                                                                                                                                                                                                                                                                                                                                                                                                                                                                                                                                                                                                                                                                                                                                                                                                                                                                                                                                                                                                                                                                                                                                                                                                                                                                                                                                                                                                                                                                                                    | 1 | 10/5/2018 | 11/5/2018 | 3 | 11/8/2018 | 11/8/2021 | ##### | 119,622,517 | 471,347,390 | ##### | .46 € | .66 € |



|       |   |                                                                                                                                                                                                                                                                                                                                                                                                                                                                                                                                                                                                                                                                                                                                                                                                                                                                                                                                                                                                                                                                                                                                                                                                                                                                                                                                                                                                                                                                                                                                                                                                                                                                                                                                                                                                                                                                                                                                                                                                                                                                                                                                                                                                                                                                                                                                                                          |           |           |   |           |           |                |                                        |
|-------|---|--------------------------------------------------------------------------------------------------------------------------------------------------------------------------------------------------------------------------------------------------------------------------------------------------------------------------------------------------------------------------------------------------------------------------------------------------------------------------------------------------------------------------------------------------------------------------------------------------------------------------------------------------------------------------------------------------------------------------------------------------------------------------------------------------------------------------------------------------------------------------------------------------------------------------------------------------------------------------------------------------------------------------------------------------------------------------------------------------------------------------------------------------------------------------------------------------------------------------------------------------------------------------------------------------------------------------------------------------------------------------------------------------------------------------------------------------------------------------------------------------------------------------------------------------------------------------------------------------------------------------------------------------------------------------------------------------------------------------------------------------------------------------------------------------------------------------------------------------------------------------------------------------------------------------------------------------------------------------------------------------------------------------------------------------------------------------------------------------------------------------------------------------------------------------------------------------------------------------------------------------------------------------------------------------------------------------------------------------------------------------|-----------|-----------|---|-----------|-----------|----------------|----------------------------------------|
|       |   | (chiusura Sicilia) - n. 858 del 3 febbraio 2022<br>(chiusura Trento) - n. 859 del 3 febbraio 2022 (chiusura Lombardia) - n. 868 del 1 marzo 2022 (chiusura Bolzano)<br>n. 558 del 15 novembre 2018 - n. 559 del 29 novembre 2018 - n. 560 del 7 dicembre 2018 - n. 564 del 27 dicembre 2018<br>(Toscana) - n. 568 del 16 gennaio 2019<br>(Liguria) - n. 575 dell'8 febbraio 2019 - n. 593 del 17 maggio 2019 (Liguria) - n. 601 del 1 agosto 2019 - n. 606 del 18 settembre 2019 - n. 613 del 5 novembre 2019 - n. 694 del 18 agosto 2020 (Marche) - n. 696 del 18 agosto 2020 - n. 727 del 28 dicembre 2020 - n. 769 del 16 aprile 2021 (Veneto) - n. 799 del 1° ottobre 2021 (Veneto) - n. 833 del 12 gennaio 2022 (chiusura Calabria) - n. 834 del 12 gennaio 2022 (chiusura Sardegna) - n. 835 del 12 gennaio 2022 (chiusura Liguria) - n. 836 del 12 gennaio 2022 (chiusura Veneto) - n. 837 del 12 gennaio 2022 (chiusura Friuli-Venezia Giulia) - n. 838 del 12 gennaio 2022 (chiusura Toscana) - n. 840 del 12 gennaio 2022 (chiusura Emilia-Romagna) - n. 850 del 3 febbraio 2022 (chiusura Lazio) - n. 857 del 3 febbraio 2022 (chiusura Sicilia) - n. 858 del 3 febbraio 2022 (chiusura Trento) - n. 859 del 3 febbraio 2022 (chiusura Lombardia) - n. 868 del 1 marzo 2022 (chiusura Bolzano)<br>n. 558 del 15 novembre 2018 - n. 559 del 29 novembre 2018 - n. 560 del 7 dicembre 2018 - n. 564 del 27 dicembre 2018<br>(Toscana) - n. 568 del 16 gennaio 2019<br>(Liguria) - n. 575 dell'8 febbraio 2019 - n. 593 del 17 maggio 2019 (Liguria) - n. 601 del 1 agosto 2019 - n. 606 del 18 settembre 2019 - n. 613 del 5 novembre 2019 - n. 694 del 18 agosto 2020 (Marche) - n. 696 del 18 agosto 2020 - n. 727 del 28 dicembre 2020 - n. 769 del 16 aprile 2021 (Veneto) - n. 799 del 1° ottobre 2021 (Veneto) - n. 833 del 12 gennaio 2022 (chiusura Calabria) - n. 834 del 12 gennaio 2022 (chiusura Sardegna) - n. 835 del 12 gennaio 2022 (chiusura Liguria) - n. 836 del 12 gennaio 2022 (chiusura Veneto) - n. 837 del 12 gennaio 2022 (chiusura Friuli-Venezia Giulia) - n. 838 del 12 gennaio 2022 (chiusura Toscana) - n. 840 del 12 gennaio 2022 (chiusura Emilia-Romagna) - n. 850 del 3 febbraio 2022 (chiusura Lazio) - n. 857 del 3 febbraio 2022 (chiusura Sicilia) - n. 858 del 3 febbraio 2022 (chiusura Trento) - n. 859 del 3 febbraio | 10/5/2018 | 11/5/2018 | 3 | 11/8/2018 | 11/8/2021 | #####<br>##### | 119,622,517,471,347,390<br>.46 € .66 € |
| ITI19 | 1 |                                                                                                                                                                                                                                                                                                                                                                                                                                                                                                                                                                                                                                                                                                                                                                                                                                                                                                                                                                                                                                                                                                                                                                                                                                                                                                                                                                                                                                                                                                                                                                                                                                                                                                                                                                                                                                                                                                                                                                                                                                                                                                                                                                                                                                                                                                                                                                          |           |           |   |           |           |                |                                        |
| ITC33 | 1 |                                                                                                                                                                                                                                                                                                                                                                                                                                                                                                                                                                                                                                                                                                                                                                                                                                                                                                                                                                                                                                                                                                                                                                                                                                                                                                                                                                                                                                                                                                                                                                                                                                                                                                                                                                                                                                                                                                                                                                                                                                                                                                                                                                                                                                                                                                                                                                          |           |           |   |           |           |                |                                        |
|       |   | (chiusura Sicilia) - n. 858 del 3 febbraio 2022<br>(chiusura Trento) - n. 859 del 3 febbraio 2022 (chiusura Lombardia) - n. 868 del 1 marzo 2022 (chiusura Bolzano)<br>n. 558 del 15 novembre 2018 - n. 559 del 29 novembre 2018 - n. 560 del 7 dicembre 2018 - n. 564 del 27 dicembre 2018<br>(Toscana) - n. 568 del 16 gennaio 2019<br>(Liguria) - n. 575 dell'8 febbraio 2019 - n. 593 del 17 maggio 2019 (Liguria) - n. 601 del 1 agosto 2019 - n. 606 del 18 settembre 2019 - n. 613 del 5 novembre 2019 - n. 694 del 18 agosto 2020 (Marche) - n. 696 del 18 agosto 2020 - n. 727 del 28 dicembre 2020 - n. 769 del 16 aprile 2021 (Veneto) - n. 799 del 1° ottobre 2021 (Veneto) - n. 833 del 12 gennaio 2022 (chiusura Calabria) - n. 834 del 12 gennaio 2022 (chiusura Sardegna) - n. 835 del 12 gennaio 2022 (chiusura Liguria) - n. 836 del 12 gennaio 2022 (chiusura Veneto) - n. 837 del 12 gennaio 2022 (chiusura Friuli-Venezia Giulia) - n. 838 del 12 gennaio 2022 (chiusura Toscana) - n. 840 del 12 gennaio 2022 (chiusura Emilia-Romagna) - n. 850 del 3 febbraio 2022 (chiusura Lazio) - n. 857 del 3 febbraio 2022 (chiusura Sicilia) - n. 858 del 3 febbraio 2022 (chiusura Trento) - n. 859 del 3 febbraio                                                                                                                                                                                                                                                                                                                                                                                                                                                                                                                                                                                                                                                                                                                                                                                                                                                                                                                                                                                                                                                                                                                                       | 10/5/2018 | 11/5/2018 | 3 | 11/8/2018 | 11/8/2021 | #####<br>##### | 119,622,517,471,347,390<br>.46 € .66 € |

|       |   |                                                                                                                                                                                                                                                                                                                                                                                                                                                                                                                                                                                                                                                                                                                                                                                                                                                                                                                                                                                                                                                                                                                                                                                                                                                                                                                                                                                                                                                                                                                                                                                                                                                                                                                                                                                                                                                                                                                                                                                                                                                                                                                                                                                                                                                                                                                                        |           |           |   |           |           |       |                         |       |       |       |
|-------|---|----------------------------------------------------------------------------------------------------------------------------------------------------------------------------------------------------------------------------------------------------------------------------------------------------------------------------------------------------------------------------------------------------------------------------------------------------------------------------------------------------------------------------------------------------------------------------------------------------------------------------------------------------------------------------------------------------------------------------------------------------------------------------------------------------------------------------------------------------------------------------------------------------------------------------------------------------------------------------------------------------------------------------------------------------------------------------------------------------------------------------------------------------------------------------------------------------------------------------------------------------------------------------------------------------------------------------------------------------------------------------------------------------------------------------------------------------------------------------------------------------------------------------------------------------------------------------------------------------------------------------------------------------------------------------------------------------------------------------------------------------------------------------------------------------------------------------------------------------------------------------------------------------------------------------------------------------------------------------------------------------------------------------------------------------------------------------------------------------------------------------------------------------------------------------------------------------------------------------------------------------------------------------------------------------------------------------------------|-----------|-----------|---|-----------|-----------|-------|-------------------------|-------|-------|-------|
| ITC31 | 1 | 2022 (chiusura Lombardia) - n. 868 del 1 marzo 2022 (chiusura Bolzano)<br>n. 558 del 15 novembre 2018 - n. 559 del 29 novembre 2018 - n. 560 del 7 dicembre 2018 - n. 564 del 27 dicembre 2018 (Toscana) - n. 568 del 16 gennaio 2019 (Liguria) - n. 575 dell'8 febbraio 2019 - n. 593 del 17 maggio 2019 (Liguria) - n. 601 del 1 agosto 2019 - n. 606 del 18 settembre 2019 - n. 613 del 5 novembre 2019 - n. 694 del 18 agosto 2020 (Marche) - n. 696 del 18 agosto 2020 - n. 727 del 28 dicembre 2020 - n. 769 del 16 aprile 2021 (Veneto) - n. 799 del 1° ottobre 2021 (Veneto) - n. 833 del 12 gennaio 2022 (chiusura Calabria) - n. 834 del 12 gennaio 2022 (chiusura Sardegna) - n. 835 del 12 gennaio 2022 (chiusura Liguria) - n. 836 del 12 gennaio 2022 (chiusura Veneto) - n. 837 del 12 gennaio 2022 (chiusura Friuli-Venezia Giulia) - n. 838 del 12 gennaio 2022 (chiusura Toscana) - n. 840 del 12 gennaio 2022 (chiusura Emilia-Romagna) - n. 850 del 3 febbraio 2022 (chiusura Lazio) - n. 857 del 3 febbraio 2022 (chiusura Sicilia) - n. 858 del 3 febbraio 2022 (chiusura Trento) - n. 859 del 3 febbraio 2022 (chiusura Lombardia) - n. 868 del 1 marzo 2022 (chiusura Bolzano)<br>n. 558 del 15 novembre 2018 - n. 559 del 29 novembre 2018 - n. 560 del 7 dicembre 2018 - n. 564 del 27 dicembre 2018 (Toscana) - n. 568 del 16 gennaio 2019 (Liguria) - n. 575 dell'8 febbraio 2019 - n. 593 del 17 maggio 2019 (Liguria) - n. 601 del 1 agosto 2019 - n. 606 del 18 settembre 2019 - n. 613 del 5 novembre 2019 - n. 694 del 18 agosto 2020 (Marche) - n. 696 del 18 agosto 2020 - n. 727 del 28 dicembre 2020 - n. 769 del 16 aprile 2021 (Veneto) - n. 799 del 1° ottobre 2021 (Veneto) - n. 833 del 12 gennaio 2022 (chiusura Calabria) - n. 834 del 12 gennaio 2022 (chiusura Sardegna) - n. 835 del 12 gennaio 2022 (chiusura Liguria) - n. 836 del 12 gennaio 2022 (chiusura Veneto) - n. 837 del 12 gennaio 2022 (chiusura Friuli-Venezia Giulia) - n. 838 del 12 gennaio 2022 (chiusura Toscana) - n. 840 del 12 gennaio 2022 (chiusura Emilia-Romagna) - n. 850 del 3 febbraio 2022 (chiusura Lazio) - n. 857 del 3 febbraio 2022 (chiusura Sicilia) - n. 858 del 3 febbraio 2022 (chiusura Trento) - n. 859 del 3 febbraio 2022 (chiusura Lombardia) - n. 868 del 1 marzo 2022 (chiusura Bolzano) | 10/5/2018 | 11/5/2018 | 3 | 11/8/2018 | 11/8/2021 | ##### | 119,622,517,471,347,390 | ##### | .46 € | .66 € |
|       |   |                                                                                                                                                                                                                                                                                                                                                                                                                                                                                                                                                                                                                                                                                                                                                                                                                                                                                                                                                                                                                                                                                                                                                                                                                                                                                                                                                                                                                                                                                                                                                                                                                                                                                                                                                                                                                                                                                                                                                                                                                                                                                                                                                                                                                                                                                                                                        |           |           |   |           |           |       |                         |       |       |       |
| ITC34 | 1 | 2022 (chiusura Lombardia) - n. 868 del 1 marzo 2022 (chiusura Bolzano)<br>n. 558 del 15 novembre 2018 - n. 559 del 29 novembre 2018 - n. 560 del 7 dicembre 2018 - n. 564 del 27 dicembre 2018 (Toscana) - n. 568 del 16 gennaio 2019 (Liguria) - n. 575 dell'8 febbraio 2019 - n. 593 del 17 maggio 2019 (Liguria) - n. 601 del 1 agosto 2019 - n. 606 del 18 settembre 2019 - n. 613 del 5 novembre 2019 - n. 694 del 18 agosto 2020 (Marche) - n. 696 del 18 agosto 2020 - n. 727 del 28 dicembre 2020 - n. 769 del 16 aprile 2021 (Veneto) - n. 799 del 1° ottobre 2021 (Veneto) - n. 833 del 12 gennaio 2022 (chiusura Calabria) - n. 834 del 12 gennaio 2022 (chiusura Sardegna) - n. 835 del 12 gennaio 2022 (chiusura Liguria) - n. 836 del 12 gennaio 2022 (chiusura Veneto) - n. 837 del 12 gennaio 2022 (chiusura Friuli-Venezia Giulia) - n. 838 del 12 gennaio 2022 (chiusura Toscana) - n. 840 del 12 gennaio 2022 (chiusura Emilia-Romagna) - n. 850 del 3 febbraio 2022 (chiusura Lazio) - n. 857 del 3 febbraio 2022 (chiusura Sicilia) - n. 858 del 3 febbraio 2022 (chiusura Trento) - n. 859 del 3 febbraio 2022 (chiusura Lombardia) - n. 868 del 1 marzo 2022 (chiusura Bolzano)                                                                                                                                                                                                                                                                                                                                                                                                                                                                                                                                                                                                                                                                                                                                                                                                                                                                                                                                                                                                                                                                                                                                 | 10/5/2018 | 11/5/2018 | 3 | 11/8/2018 | 11/8/2021 | ##### | 119,622,517,471,347,390 | ##### | .46 € | .66 € |
|       |   |                                                                                                                                                                                                                                                                                                                                                                                                                                                                                                                                                                                                                                                                                                                                                                                                                                                                                                                                                                                                                                                                                                                                                                                                                                                                                                                                                                                                                                                                                                                                                                                                                                                                                                                                                                                                                                                                                                                                                                                                                                                                                                                                                                                                                                                                                                                                        |           |           |   |           |           |       |                         |       |       |       |

|       |   |                                                                                                                                                                                                                                                                                                                                                                                                                                                                                                                                                                                                                                                                                                                                                                                                                                                                                                                                                                                                                                                                                                                              |           |           |   |           |           |       |                         |       |       |       |
|-------|---|------------------------------------------------------------------------------------------------------------------------------------------------------------------------------------------------------------------------------------------------------------------------------------------------------------------------------------------------------------------------------------------------------------------------------------------------------------------------------------------------------------------------------------------------------------------------------------------------------------------------------------------------------------------------------------------------------------------------------------------------------------------------------------------------------------------------------------------------------------------------------------------------------------------------------------------------------------------------------------------------------------------------------------------------------------------------------------------------------------------------------|-----------|-----------|---|-----------|-----------|-------|-------------------------|-------|-------|-------|
| ITC32 | 1 | n. 558 del 15 novembre 2018 - n. 559 del 29 novembre 2018 - n. 560 del 7 dicembre 2018 - n. 564 del 27 dicembre 2018 (Toscana) - n. 568 del 16 gennaio 2019 (Liguria) - n. 575 dell'8 febbraio 2019 - n. 593 del 17 maggio 2019 (Liguria) - n. 601 del 1 agosto 2019 - n. 606 del 18 settembre 2019 - n. 613 del 5 novembre 2019 - n. 694 del 18 agosto 2020 (Marche) - n. 696 del 18 agosto 2020 - n. 727 del 28 dicembre 2020 - n. 769 del 16 aprile 2021 (Veneto) - n. 799 del 1° ottobre 2021 (Veneto) - n. 833 del 12 gennaio 2022 (chiusura Calabria) - n. 834 del 12 gennaio 2022 (chiusura Sardegna) - n. 835 del 12 gennaio 2022 (chiusura Liguria) - n. 836 del 12 gennaio 2022 (chiusura Veneto) - n. 837 del 12 gennaio 2022 (chiusura Friuli-Venezia Giulia) - n. 838 del 12 gennaio 2022 (chiusura Toscana) - n. 840 del 12 gennaio 2022 (chiusura Emilia-Romagna) - n. 850 del 3 febbraio 2022 (chiusura Lazio) - n. 857 del 3 febbraio 2022 (chiusura Sicilia) - n. 858 del 3 febbraio 2022 (chiusura Trento) - n. 859 del 3 febbraio 2022 (chiusura Lombardia) - n. 868 del 1 marzo 2022 (chiusura Bolzano) | 10/5/2018 | 11/5/2018 | 3 | 11/8/2018 | 11/8/2021 | ##### | 119,622,517,471,347,390 | ##### | .46 € | .66 € |
| ITC46 | 1 | n. 558 del 15 novembre 2018 - n. 559 del 29 novembre 2018 - n. 560 del 7 dicembre 2018 - n. 564 del 27 dicembre 2018 (Toscana) - n. 568 del 16 gennaio 2019 (Liguria) - n. 575 dell'8 febbraio 2019 - n. 593 del 17 maggio 2019 (Liguria) - n. 601 del 1 agosto 2019 - n. 606 del 18 settembre 2019 - n. 613 del 5 novembre 2019 - n. 694 del 18 agosto 2020 (Marche) - n. 696 del 18 agosto 2020 - n. 727 del 28 dicembre 2020 - n. 769 del 16 aprile 2021 (Veneto) - n. 799 del 1° ottobre 2021 (Veneto) - n. 833 del 12 gennaio 2022 (chiusura Calabria) - n. 834 del 12 gennaio 2022 (chiusura Sardegna) - n. 835 del 12 gennaio 2022 (chiusura Liguria) - n. 836 del 12 gennaio 2022 (chiusura Veneto) - n. 837 del 12 gennaio 2022 (chiusura Friuli-Venezia Giulia) - n. 838 del 12 gennaio 2022 (chiusura Toscana) - n. 840 del 12 gennaio 2022 (chiusura Emilia-Romagna) - n. 850 del 3 febbraio 2022 (chiusura Lazio) - n. 857 del 3 febbraio 2022 (chiusura Sicilia) - n. 858 del 3 febbraio 2022 (chiusura Trento) - n. 859 del 3 febbraio 2022 (chiusura Lombardia) - n. 868 del 1 marzo 2022 (chiusura Bolzano) | 10/5/2018 | 11/5/2018 | 3 | 11/8/2018 | 11/8/2021 | ##### | 119,622,517,471,347,390 | ##### | .46 € | .66 € |
| ITC47 | 1 | n. 558 del 15 novembre 2018 - n. 559 del 29 novembre 2018 - n. 560 del 7 dicembre                                                                                                                                                                                                                                                                                                                                                                                                                                                                                                                                                                                                                                                                                                                                                                                                                                                                                                                                                                                                                                            | 10/5/2018 | 11/5/2018 | 3 | 11/8/2018 | 11/8/2021 | ##### | 119,622,517,471,347,390 | ##### | .46 € | .66 € |

|                                                                                                                                                                                                                                                                                                                                                                                                                                                                                                                                                                                                                                                                                                                                                                                                                                                                                                                                                                                                                                                                                                                                                                                                                                                                                                                                                                                                                                                                                                                                                                                                                                                                                                                                                                                                                                                                                                                                                                                                                                                                                                                                                                                                                                                                                                                                                                                                                                                                                                                                                                                                                       |   |           |           |   |           |           |       |                         |       |             |
|-----------------------------------------------------------------------------------------------------------------------------------------------------------------------------------------------------------------------------------------------------------------------------------------------------------------------------------------------------------------------------------------------------------------------------------------------------------------------------------------------------------------------------------------------------------------------------------------------------------------------------------------------------------------------------------------------------------------------------------------------------------------------------------------------------------------------------------------------------------------------------------------------------------------------------------------------------------------------------------------------------------------------------------------------------------------------------------------------------------------------------------------------------------------------------------------------------------------------------------------------------------------------------------------------------------------------------------------------------------------------------------------------------------------------------------------------------------------------------------------------------------------------------------------------------------------------------------------------------------------------------------------------------------------------------------------------------------------------------------------------------------------------------------------------------------------------------------------------------------------------------------------------------------------------------------------------------------------------------------------------------------------------------------------------------------------------------------------------------------------------------------------------------------------------------------------------------------------------------------------------------------------------------------------------------------------------------------------------------------------------------------------------------------------------------------------------------------------------------------------------------------------------------------------------------------------------------------------------------------------------|---|-----------|-----------|---|-----------|-----------|-------|-------------------------|-------|-------------|
| <p>2018 - n. 564 del 27 dicembre 2018<br/> (Toscana) - n. 568 del 16 gennaio 2019<br/> (Liguria) - n. 575 dell'8 febbraio 2019 - n. 593<br/> del 17 maggio 2019 (Liguria) - n. 601 del 1<br/> agosto 2019 - n. 606 del 18 settembre 2019 -<br/> n. 613 del 5 novembre 2019 - n. 694 del 18<br/> agosto 2020 (Marche) - n. 696 del 18 agosto<br/> 2020 - n. 727 del 28 dicembre 2020 - n. 769<br/> del 16 aprile 2021 (Veneto) - n. 799 del 1°<br/> ottobre 2021 (Veneto) - n. 833 del 12<br/> gennaio 2022 (chiusura Calabria) - n. 834 del<br/> 12 gennaio 2022 (chiusura Sardegna) - n.<br/> 835 del 12 gennaio 2022 (chiusura Liguria) -<br/> n. 836 del 12 gennaio 2022 (chiusura<br/> Veneto) - n. 837 del 12 gennaio 2022<br/> (chiusura Friuli-Venezia Giulia) - n. 838 del<br/> 12 gennaio 2022 (chiusura Toscana) - n. 840<br/> del 12 gennaio 2022 (chiusura Emilia-<br/> Romagna) - n. 850 del 3 febbraio 2022<br/> (chiusura Lazio) - n. 857 del 3 febbraio 2022<br/> (chiusura Sicilia) - n. 858 del 3 febbraio 2022<br/> (chiusura Trento) - n. 859 del 3 febbraio<br/> 2022 (chiusura Lombardia) - n. 868 del 1<br/> marzo 2022 (chiusura Bolzano)<br/> n. 558 del 15 novembre 2018 - n. 559 del 29<br/> novembre 2018 - n. 560 del 7 dicembre<br/> 2018 - n. 564 del 27 dicembre 2018<br/> (Toscana) - n. 568 del 16 gennaio 2019<br/> (Liguria) - n. 575 dell'8 febbraio 2019 - n. 593<br/> del 17 maggio 2019 (Liguria) - n. 601 del 1<br/> agosto 2019 - n. 606 del 18 settembre 2019 -<br/> n. 613 del 5 novembre 2019 - n. 694 del 18<br/> agosto 2020 (Marche) - n. 696 del 18 agosto<br/> 2020 - n. 727 del 28 dicembre 2020 - n. 769<br/> del 16 aprile 2021 (Veneto) - n. 799 del 1°<br/> ottobre 2021 (Veneto) - n. 833 del 12<br/> gennaio 2022 (chiusura Calabria) - n. 834 del<br/> 12 gennaio 2022 (chiusura Sardegna) - n.<br/> 835 del 12 gennaio 2022 (chiusura Liguria) -<br/> n. 836 del 12 gennaio 2022 (chiusura<br/> Veneto) - n. 837 del 12 gennaio 2022<br/> (chiusura Friuli-Venezia Giulia) - n. 838 del<br/> 12 gennaio 2022 (chiusura Toscana) - n. 840<br/> del 12 gennaio 2022 (chiusura Emilia-<br/> Romagna) - n. 850 del 3 febbraio 2022<br/> (chiusura Lazio) - n. 857 del 3 febbraio 2022<br/> (chiusura Sicilia) - n. 858 del 3 febbraio 2022<br/> (chiusura Trento) - n. 859 del 3 febbraio<br/> 2022 (chiusura Lombardia) - n. 868 del 1<br/> marzo 2022 (chiusura Bolzano)<br/> n. 558 del 15 novembre 2018 - n. 559 del 29<br/> novembre 2018 - n. 560 del 7 dicembre<br/> 2018 - n. 564 del 27 dicembre 2018<br/> (Toscana) - n. 568 del 16 gennaio 2019</p> |   |           |           |   |           |           |       |                         |       |             |
| ITC42                                                                                                                                                                                                                                                                                                                                                                                                                                                                                                                                                                                                                                                                                                                                                                                                                                                                                                                                                                                                                                                                                                                                                                                                                                                                                                                                                                                                                                                                                                                                                                                                                                                                                                                                                                                                                                                                                                                                                                                                                                                                                                                                                                                                                                                                                                                                                                                                                                                                                                                                                                                                                 | 1 | 10/5/2018 | 11/5/2018 | 3 | 11/8/2018 | 11/8/2021 | ##### | 119,622,517,471,347,390 | ##### | .46 € .66 € |
| ITC4A                                                                                                                                                                                                                                                                                                                                                                                                                                                                                                                                                                                                                                                                                                                                                                                                                                                                                                                                                                                                                                                                                                                                                                                                                                                                                                                                                                                                                                                                                                                                                                                                                                                                                                                                                                                                                                                                                                                                                                                                                                                                                                                                                                                                                                                                                                                                                                                                                                                                                                                                                                                                                 | 1 | 10/5/2018 | 11/5/2018 | 3 | 11/8/2018 | 11/8/2021 | ##### | 119,622,517,471,347,390 | ##### | .46 € .66 € |

|       |   |                                                                                                                                                                                                                                                                                                                                                                                                                                                                                                                                                                                                                                                                                                                                                                                                                                                                                                                                                                                                                                                                                                                              |           |   |           |           |       |                         |       |             |
|-------|---|------------------------------------------------------------------------------------------------------------------------------------------------------------------------------------------------------------------------------------------------------------------------------------------------------------------------------------------------------------------------------------------------------------------------------------------------------------------------------------------------------------------------------------------------------------------------------------------------------------------------------------------------------------------------------------------------------------------------------------------------------------------------------------------------------------------------------------------------------------------------------------------------------------------------------------------------------------------------------------------------------------------------------------------------------------------------------------------------------------------------------|-----------|---|-----------|-----------|-------|-------------------------|-------|-------------|
| <hr/> |   |                                                                                                                                                                                                                                                                                                                                                                                                                                                                                                                                                                                                                                                                                                                                                                                                                                                                                                                                                                                                                                                                                                                              |           |   |           |           |       |                         |       |             |
|       |   | (Liguria) - n. 575 dell'8 febbraio 2019 - n. 593 del 17 maggio 2019 (Liguria) - n. 601 del 1 agosto 2019 - n. 606 del 18 settembre 2019 - n. 613 del 5 novembre 2019 - n. 694 del 18 agosto 2020 (Marche) - n. 696 del 18 agosto 2020 - n. 727 del 28 dicembre 2020 - n. 769 del 16 aprile 2021 (Veneto) - n. 799 del 1° ottobre 2021 (Veneto) - n. 833 del 12 gennaio 2022 (chiusura Calabria) - n. 834 del 12 gennaio 2022 (chiusura Sardegna) - n. 835 del 12 gennaio 2022 (chiusura Liguria) - n. 836 del 12 gennaio 2022 (chiusura Veneto) - n. 837 del 12 gennaio 2022 (chiusura Friuli-Venezia Giulia) - n. 838 del 12 gennaio 2022 (chiusura Toscana) - n. 840 del 12 gennaio 2022 (chiusura Emilia-Romagna) - n. 850 del 3 febbraio 2022 (chiusura Lazio) - n. 857 del 3 febbraio 2022 (chiusura Sicilia) - n. 858 del 3 febbraio 2022 (chiusura Trento) - n. 859 del 3 febbraio 2022 (chiusura Lombardia) - n. 868 del 1 marzo 2022 (chiusura Bolzano)                                                                                                                                                             |           |   |           |           |       |                         |       |             |
|       |   | n. 558 del 15 novembre 2018 - n. 559 del 29 novembre 2018 - n. 560 del 7 dicembre 2018 - n. 564 del 27 dicembre 2018 (Toscana) - n. 568 del 16 gennaio 2019 (Liguria) - n. 575 dell'8 febbraio 2019 - n. 593 del 17 maggio 2019 (Liguria) - n. 601 del 1 agosto 2019 - n. 606 del 18 settembre 2019 - n. 613 del 5 novembre 2019 - n. 694 del 18 agosto 2020 (Marche) - n. 696 del 18 agosto 2020 - n. 727 del 28 dicembre 2020 - n. 769 del 16 aprile 2021 (Veneto) - n. 799 del 1° ottobre 2021 (Veneto) - n. 833 del 12 gennaio 2022 (chiusura Calabria) - n. 834 del 12 gennaio 2022 (chiusura Sardegna) - n. 835 del 12 gennaio 2022 (chiusura Liguria) - n. 836 del 12 gennaio 2022 (chiusura Veneto) - n. 837 del 12 gennaio 2022 (chiusura Friuli-Venezia Giulia) - n. 838 del 12 gennaio 2022 (chiusura Toscana) - n. 840 del 12 gennaio 2022 (chiusura Emilia-Romagna) - n. 850 del 3 febbraio 2022 (chiusura Lazio) - n. 857 del 3 febbraio 2022 (chiusura Sicilia) - n. 858 del 3 febbraio 2022 (chiusura Trento) - n. 859 del 3 febbraio 2022 (chiusura Lombardia) - n. 868 del 1 marzo 2022 (chiusura Bolzano) |           |   |           |           |       |                         |       |             |
|       |   | n. 558 del 15 novembre 2018 - n. 559 del 29 novembre 2018 - n. 560 del 7 dicembre 2018 - n. 564 del 27 dicembre 2018 (Toscana) - n. 568 del 16 gennaio 2019 (Liguria) - n. 575 dell'8 febbraio 2019 - n. 593 del 17 maggio 2019 (Liguria) - n. 601 del 1 agosto 2019 - n. 606 del 18 settembre 2019 - n. 613 del 5 novembre 2019 - n. 694 del 18 agosto 2020 (Marche) - n. 696 del 18 agosto 2020 - n. 727 del 28 dicembre 2020 - n. 769 del 16 aprile 2021 (Veneto) - n. 799 del 1° ottobre 2021 (Veneto) - n. 833 del 12 gennaio 2022 (chiusura Calabria) - n. 834 del 12 gennaio 2022 (chiusura Sardegna) - n. 835 del 12 gennaio 2022 (chiusura Liguria) - n. 836 del 12 gennaio 2022 (chiusura Veneto) - n. 837 del 12 gennaio 2022 (chiusura Friuli-Venezia Giulia) - n. 838 del 12 gennaio 2022 (chiusura Toscana) - n. 840 del 12 gennaio 2022 (chiusura Emilia-Romagna) - n. 850 del 3 febbraio 2022 (chiusura Lazio) - n. 857 del 3 febbraio 2022 (chiusura Sicilia) - n. 858 del 3 febbraio 2022 (chiusura Trento) - n. 859 del 3 febbraio 2022 (chiusura Lombardia) - n. 868 del 1 marzo 2022 (chiusura Bolzano) |           |   |           |           |       |                         |       |             |
| ITC43 | 1 | 10/5/2018                                                                                                                                                                                                                                                                                                                                                                                                                                                                                                                                                                                                                                                                                                                                                                                                                                                                                                                                                                                                                                                                                                                    | 11/5/2018 | 3 | 11/8/2018 | 11/8/2021 | ##### | 119,622,517,471,347,390 | ##### | .46 € .66 € |
|       |   |                                                                                                                                                                                                                                                                                                                                                                                                                                                                                                                                                                                                                                                                                                                                                                                                                                                                                                                                                                                                                                                                                                                              |           |   |           |           |       |                         |       |             |
| ITC49 | 1 | 10/5/2018                                                                                                                                                                                                                                                                                                                                                                                                                                                                                                                                                                                                                                                                                                                                                                                                                                                                                                                                                                                                                                                                                                                    | 11/5/2018 | 3 | 11/8/2018 | 11/8/2021 | ##### | 119,622,517,471,347,390 | ##### | .46 € .66 € |
|       |   |                                                                                                                                                                                                                                                                                                                                                                                                                                                                                                                                                                                                                                                                                                                                                                                                                                                                                                                                                                                                                                                                                                                              |           |   |           |           |       |                         |       |             |
|       |   | (Liguria) - n. 575 dell'8 febbraio 2019 - n. 593 del 17 maggio 2019 (Liguria) - n. 601 del 1                                                                                                                                                                                                                                                                                                                                                                                                                                                                                                                                                                                                                                                                                                                                                                                                                                                                                                                                                                                                                                 |           |   |           |           |       |                         |       |             |
| <hr/> |   |                                                                                                                                                                                                                                                                                                                                                                                                                                                                                                                                                                                                                                                                                                                                                                                                                                                                                                                                                                                                                                                                                                                              |           |   |           |           |       |                         |       |             |

|                                                                                                                                                                                                                                                                                                                                                                                                                                                                                                                                                                                                                                                                                                                                                                                                                                                                                                                                                                                                                                                                                                                                                                                                                                                                                                                                                                                                                                                                                                                                                                                                                                                                                                                                                                                                                                                                                                                                                                                                                                                                                                                                                                                                                                                                                                                                                                        |   |           |           |   |           |           |       |                         |       |       |       |
|------------------------------------------------------------------------------------------------------------------------------------------------------------------------------------------------------------------------------------------------------------------------------------------------------------------------------------------------------------------------------------------------------------------------------------------------------------------------------------------------------------------------------------------------------------------------------------------------------------------------------------------------------------------------------------------------------------------------------------------------------------------------------------------------------------------------------------------------------------------------------------------------------------------------------------------------------------------------------------------------------------------------------------------------------------------------------------------------------------------------------------------------------------------------------------------------------------------------------------------------------------------------------------------------------------------------------------------------------------------------------------------------------------------------------------------------------------------------------------------------------------------------------------------------------------------------------------------------------------------------------------------------------------------------------------------------------------------------------------------------------------------------------------------------------------------------------------------------------------------------------------------------------------------------------------------------------------------------------------------------------------------------------------------------------------------------------------------------------------------------------------------------------------------------------------------------------------------------------------------------------------------------------------------------------------------------------------------------------------------------|---|-----------|-----------|---|-----------|-----------|-------|-------------------------|-------|-------|-------|
| <p>agosto 2019 - n. 606 del 18 settembre 2019 - n. 613 del 5 novembre 2019 - n. 694 del 18 agosto 2020 (Marche) - n. 696 del 18 agosto 2020 - n. 727 del 28 dicembre 2020 - n. 769 del 16 aprile 2021 (Veneto) - n. 799 del 1° ottobre 2021 (Veneto) - n. 833 del 12 gennaio 2022 (chiusura Calabria) - n. 834 del 12 gennaio 2022 (chiusura Sardegna) - n. 835 del 12 gennaio 2022 (chiusura Liguria) - n. 836 del 12 gennaio 2022 (chiusura Veneto) - n. 837 del 12 gennaio 2022 (chiusura Friuli-Venezia Giulia) - n. 838 del 12 gennaio 2022 (chiusura Toscana) - n. 840 del 12 gennaio 2022 (chiusura Emilia-Romagna) - n. 850 del 3 febbraio 2022 (chiusura Lazio) - n. 857 del 3 febbraio 2022 (chiusura Sicilia) - n. 858 del 3 febbraio 2022 (chiusura Trento) - n. 859 del 3 febbraio 2022 (chiusura Lombardia) - n. 868 del 1 marzo 2022 (chiusura Bolzano)</p> <p>n. 558 del 15 novembre 2018 - n. 559 del 29 novembre 2018 - n. 560 del 7 dicembre 2018 - n. 564 del 27 dicembre 2018 (Toscana) - n. 568 del 16 gennaio 2019 (Liguria) - n. 575 dell'8 febbraio 2019 - n. 593 del 17 maggio 2019 (Liguria) - n. 601 del 1 agosto 2019 - n. 606 del 18 settembre 2019 - n. 613 del 5 novembre 2019 - n. 694 del 18 agosto 2020 (Marche) - n. 696 del 18 agosto 2020 - n. 727 del 28 dicembre 2020 - n. 769 del 16 aprile 2021 (Veneto) - n. 799 del 1° ottobre 2021 (Veneto) - n. 833 del 12 gennaio 2022 (chiusura Calabria) - n. 834 del 12 gennaio 2022 (chiusura Sardegna) - n. 835 del 12 gennaio 2022 (chiusura Liguria) - n. 836 del 12 gennaio 2022 (chiusura Veneto) - n. 837 del 12 gennaio 2022 (chiusura Friuli-Venezia Giulia) - n. 838 del 12 gennaio 2022 (chiusura Toscana) - n. 840 del 12 gennaio 2022 (chiusura Emilia-Romagna) - n. 850 del 3 febbraio 2022 (chiusura Lazio) - n. 857 del 3 febbraio 2022 (chiusura Sicilia) - n. 858 del 3 febbraio 2022 (chiusura Trento) - n. 859 del 3 febbraio 2022 (chiusura Lombardia) - n. 868 del 1 marzo 2022 (chiusura Bolzano)</p> <p>n. 558 del 15 novembre 2018 - n. 559 del 29 novembre 2018 - n. 560 del 7 dicembre 2018 - n. 564 del 27 dicembre 2018 (Toscana) - n. 568 del 16 gennaio 2019 (Liguria) - n. 575 dell'8 febbraio 2019 - n. 593 del 17 maggio 2019 (Liguria) - n. 601 del 1 agosto 2019 - n. 606 del 18 settembre 2019 - n. 613 del 5 novembre 2019 - n. 694 del 18</p> |   |           |           |   |           |           |       |                         |       |       |       |
| ITC4C                                                                                                                                                                                                                                                                                                                                                                                                                                                                                                                                                                                                                                                                                                                                                                                                                                                                                                                                                                                                                                                                                                                                                                                                                                                                                                                                                                                                                                                                                                                                                                                                                                                                                                                                                                                                                                                                                                                                                                                                                                                                                                                                                                                                                                                                                                                                                                  | 1 | 10/5/2018 | 11/5/2018 | 3 | 11/8/2018 | 11/8/2021 | ##### | 119,622,517,471,347,390 | ##### | .46 € | .66 € |
| ITC48                                                                                                                                                                                                                                                                                                                                                                                                                                                                                                                                                                                                                                                                                                                                                                                                                                                                                                                                                                                                                                                                                                                                                                                                                                                                                                                                                                                                                                                                                                                                                                                                                                                                                                                                                                                                                                                                                                                                                                                                                                                                                                                                                                                                                                                                                                                                                                  | 1 | 10/5/2018 | 11/5/2018 | 3 | 11/8/2018 | 11/8/2021 | ##### | 119,622,517,471,347,390 | ##### | .46 € | .66 € |

|                                                                                                                                                                                                                                                                                                                                                                                                                                                                                                                                                                                                                                                                                                                                                                                                                                                                                                                                                                                                                                                                                                                                                                                                                                                                                                                                                                                                                                                                                                                                                                                                                                                                                                                                                                                                                                                                                                                                                                                                                                                                                                                                                                                                                                                                                                                                                                        |   |           |           |   |           |           |       |                         |       |             |
|------------------------------------------------------------------------------------------------------------------------------------------------------------------------------------------------------------------------------------------------------------------------------------------------------------------------------------------------------------------------------------------------------------------------------------------------------------------------------------------------------------------------------------------------------------------------------------------------------------------------------------------------------------------------------------------------------------------------------------------------------------------------------------------------------------------------------------------------------------------------------------------------------------------------------------------------------------------------------------------------------------------------------------------------------------------------------------------------------------------------------------------------------------------------------------------------------------------------------------------------------------------------------------------------------------------------------------------------------------------------------------------------------------------------------------------------------------------------------------------------------------------------------------------------------------------------------------------------------------------------------------------------------------------------------------------------------------------------------------------------------------------------------------------------------------------------------------------------------------------------------------------------------------------------------------------------------------------------------------------------------------------------------------------------------------------------------------------------------------------------------------------------------------------------------------------------------------------------------------------------------------------------------------------------------------------------------------------------------------------------|---|-----------|-----------|---|-----------|-----------|-------|-------------------------|-------|-------------|
| <p>agosto 2020 (Marche) - n. 696 del 18 agosto 2020 - n. 727 del 28 dicembre 2020 - n. 769 del 16 aprile 2021 (Veneto) - n. 799 del 1° ottobre 2021 (Veneto) - n. 833 del 12 gennaio 2022 (chiusura Calabria) - n. 834 del 12 gennaio 2022 (chiusura Sardegna) - n. 835 del 12 gennaio 2022 (chiusura Liguria) - n. 836 del 12 gennaio 2022 (chiusura Veneto) - n. 837 del 12 gennaio 2022 (chiusura Friuli-Venezia Giulia) - n. 838 del 12 gennaio 2022 (chiusura Toscana) - n. 840 del 12 gennaio 2022 (chiusura Emilia-Romagna) - n. 850 del 3 febbraio 2022 (chiusura Lazio) - n. 857 del 3 febbraio 2022 (chiusura Sicilia) - n. 858 del 3 febbraio 2022 (chiusura Trento) - n. 859 del 3 febbraio 2022 (chiusura Lombardia) - n. 868 del 1 marzo 2022 (chiusura Bolzano)</p> <p>n. 558 del 15 novembre 2018 - n. 559 del 29 novembre 2018 - n. 560 del 7 dicembre 2018 - n. 564 del 27 dicembre 2018 (Toscana) - n. 568 del 16 gennaio 2019 (Liguria) - n. 575 dell'8 febbraio 2019 - n. 593 del 17 maggio 2019 (Liguria) - n. 601 del 1 agosto 2019 - n. 606 del 18 settembre 2019 - n. 613 del 5 novembre 2019 - n. 694 del 18 agosto 2020 (Marche) - n. 696 del 18 agosto 2020 - n. 727 del 28 dicembre 2020 - n. 769 del 16 aprile 2021 (Veneto) - n. 799 del 1° ottobre 2021 (Veneto) - n. 833 del 12 gennaio 2022 (chiusura Calabria) - n. 834 del 12 gennaio 2022 (chiusura Sardegna) - n. 835 del 12 gennaio 2022 (chiusura Liguria) - n. 836 del 12 gennaio 2022 (chiusura Veneto) - n. 837 del 12 gennaio 2022 (chiusura Friuli-Venezia Giulia) - n. 838 del 12 gennaio 2022 (chiusura Toscana) - n. 840 del 12 gennaio 2022 (chiusura Emilia-Romagna) - n. 850 del 3 febbraio 2022 (chiusura Lazio) - n. 857 del 3 febbraio 2022 (chiusura Sicilia) - n. 858 del 3 febbraio 2022 (chiusura Trento) - n. 859 del 3 febbraio 2022 (chiusura Lombardia) - n. 868 del 1 marzo 2022 (chiusura Bolzano)</p> <p>n. 558 del 15 novembre 2018 - n. 559 del 29 novembre 2018 - n. 560 del 7 dicembre 2018 - n. 564 del 27 dicembre 2018 (Toscana) - n. 568 del 16 gennaio 2019 (Liguria) - n. 575 dell'8 febbraio 2019 - n. 593 del 17 maggio 2019 (Liguria) - n. 601 del 1 agosto 2019 - n. 606 del 18 settembre 2019 - n. 613 del 5 novembre 2019 - n. 694 del 18 agosto 2020 (Marche) - n. 696 del 18 agosto 2020 - n. 727 del 28 dicembre 2020 - n. 769</p> |   |           |           |   |           |           |       |                         |       |             |
| ITC44                                                                                                                                                                                                                                                                                                                                                                                                                                                                                                                                                                                                                                                                                                                                                                                                                                                                                                                                                                                                                                                                                                                                                                                                                                                                                                                                                                                                                                                                                                                                                                                                                                                                                                                                                                                                                                                                                                                                                                                                                                                                                                                                                                                                                                                                                                                                                                  | 1 | 10/5/2018 | 11/5/2018 | 3 | 11/8/2018 | 11/8/2021 | ##### | 119,622,517,471,347,390 | ##### | .46 € .66 € |
| ITC41                                                                                                                                                                                                                                                                                                                                                                                                                                                                                                                                                                                                                                                                                                                                                                                                                                                                                                                                                                                                                                                                                                                                                                                                                                                                                                                                                                                                                                                                                                                                                                                                                                                                                                                                                                                                                                                                                                                                                                                                                                                                                                                                                                                                                                                                                                                                                                  | 1 | 10/5/2018 | 11/5/2018 | 3 | 11/8/2018 | 11/8/2021 | ##### | 119,622,517,471,347,390 | ##### | .46 € .66 € |

48



|       |   |                                                                                                                                                                                                                                                                                                                                                                                                                                                                                                                                                                                                                                                                                                                                                                                                                                                                                                                                                                                                                                                                                                                              |           |           |  |   |           |           |       |             |             |       |
|-------|---|------------------------------------------------------------------------------------------------------------------------------------------------------------------------------------------------------------------------------------------------------------------------------------------------------------------------------------------------------------------------------------------------------------------------------------------------------------------------------------------------------------------------------------------------------------------------------------------------------------------------------------------------------------------------------------------------------------------------------------------------------------------------------------------------------------------------------------------------------------------------------------------------------------------------------------------------------------------------------------------------------------------------------------------------------------------------------------------------------------------------------|-----------|-----------|--|---|-----------|-----------|-------|-------------|-------------|-------|
| <hr/> |   |                                                                                                                                                                                                                                                                                                                                                                                                                                                                                                                                                                                                                                                                                                                                                                                                                                                                                                                                                                                                                                                                                                                              |           |           |  |   |           |           |       |             |             |       |
|       |   | gennaio 2022 (chiusura Calabria) - n. 834 del 12 gennaio 2022 (chiusura Sardegna) - n. 835 del 12 gennaio 2022 (chiusura Liguria) - n. 836 del 12 gennaio 2022 (chiusura Veneto) - n. 837 del 12 gennaio 2022 (chiusura Friuli-Venezia Giulia) - n. 838 del 12 gennaio 2022 (chiusura Toscana) - n. 840 del 12 gennaio 2022 (chiusura Emilia-Romagna) - n. 850 del 3 febbraio 2022 (chiusura Lazio) - n. 857 del 3 febbraio 2022 (chiusura Sicilia) - n. 858 del 3 febbraio 2022 (chiusura Trento) - n. 859 del 3 febbraio 2022 (chiusura Lombardia) - n. 868 del 1 marzo 2022 (chiusura Bolzano)                                                                                                                                                                                                                                                                                                                                                                                                                                                                                                                            |           |           |  |   |           |           |       |             |             |       |
|       |   | n. 558 del 15 novembre 2018 - n. 559 del 29 novembre 2018 - n. 560 del 7 dicembre 2018 - n. 564 del 27 dicembre 2018 (Toscana) - n. 568 del 16 gennaio 2019 (Liguria) - n. 575 dell'8 febbraio 2019 - n. 593 del 17 maggio 2019 (Liguria) - n. 601 del 1 agosto 2019 - n. 606 del 18 settembre 2019 - n. 613 del 5 novembre 2019 - n. 694 del 18 agosto 2020 (Marche) - n. 696 del 18 agosto 2020 - n. 727 del 28 dicembre 2020 - n. 769 del 16 aprile 2021 (Veneto) - n. 799 del 1° ottobre 2021 (Veneto) - n. 833 del 12 gennaio 2022 (chiusura Calabria) - n. 834 del 12 gennaio 2022 (chiusura Sardegna) - n. 835 del 12 gennaio 2022 (chiusura Liguria) - n. 836 del 12 gennaio 2022 (chiusura Veneto) - n. 837 del 12 gennaio 2022 (chiusura Friuli-Venezia Giulia) - n. 838 del 12 gennaio 2022 (chiusura Toscana) - n. 840 del 12 gennaio 2022 (chiusura Emilia-Romagna) - n. 850 del 3 febbraio 2022 (chiusura Lazio) - n. 857 del 3 febbraio 2022 (chiusura Sicilia) - n. 858 del 3 febbraio 2022 (chiusura Trento) - n. 859 del 3 febbraio 2022 (chiusura Lombardia) - n. 868 del 1 marzo 2022 (chiusura Bolzano) |           |           |  |   |           |           |       |             |             |       |
|       |   | n. 558 del 15 novembre 2018 - n. 559 del 29 novembre 2018 - n. 560 del 7 dicembre 2018 - n. 564 del 27 dicembre 2018 (Toscana) - n. 568 del 16 gennaio 2019 (Liguria) - n. 575 dell'8 febbraio 2019 - n. 593 del 17 maggio 2019 (Liguria) - n. 601 del 1 agosto 2019 - n. 606 del 18 settembre 2019 - n. 613 del 5 novembre 2019 - n. 694 del 18 agosto 2020 (Marche) - n. 696 del 18 agosto 2020 - n. 727 del 28 dicembre 2020 - n. 769 del 16 aprile 2021 (Veneto) - n. 799 del 1° ottobre 2021 (Veneto) - n. 833 del 12 gennaio 2022 (chiusura Calabria) - n. 834 del 12 gennaio 2022 (chiusura Sardegna) - n.                                                                                                                                                                                                                                                                                                                                                                                                                                                                                                            |           |           |  |   |           |           |       |             |             |       |
| ITG16 | 1 | gennaio 2022 (chiusura Calabria) - n. 834 del 12 gennaio 2022 (chiusura Sardegna) - n. 835 del 12 gennaio 2022 (chiusura Liguria) - n. 836 del 12 gennaio 2022 (chiusura Veneto) - n. 837 del 12 gennaio 2022 (chiusura Friuli-Venezia Giulia) - n. 838 del 12 gennaio 2022 (chiusura Toscana) - n. 840 del 12 gennaio 2022 (chiusura Emilia-Romagna) - n. 850 del 3 febbraio 2022 (chiusura Lazio) - n. 857 del 3 febbraio 2022 (chiusura Sicilia) - n. 858 del 3 febbraio 2022 (chiusura Trento) - n. 859 del 3 febbraio 2022 (chiusura Lombardia) - n. 868 del 1 marzo 2022 (chiusura Bolzano)                                                                                                                                                                                                                                                                                                                                                                                                                                                                                                                            | 10/5/2018 | 11/5/2018 |  | 3 | 11/8/2018 | 11/8/2021 | ##### | 119,622,517 | 471,347,390 | ##### |
|       |   | n. 558 del 15 novembre 2018 - n. 559 del 29 novembre 2018 - n. 560 del 7 dicembre 2018 - n. 564 del 27 dicembre 2018 (Toscana) - n. 568 del 16 gennaio 2019 (Liguria) - n. 575 dell'8 febbraio 2019 - n. 593 del 17 maggio 2019 (Liguria) - n. 601 del 1 agosto 2019 - n. 606 del 18 settembre 2019 - n. 613 del 5 novembre 2019 - n. 694 del 18 agosto 2020 (Marche) - n. 696 del 18 agosto 2020 - n. 727 del 28 dicembre 2020 - n. 769 del 16 aprile 2021 (Veneto) - n. 799 del 1° ottobre 2021 (Veneto) - n. 833 del 12 gennaio 2022 (chiusura Calabria) - n. 834 del 12 gennaio 2022 (chiusura Sardegna) - n.                                                                                                                                                                                                                                                                                                                                                                                                                                                                                                            |           |           |  |   |           |           |       | .46 €       | .66 €       |       |
|       |   | n. 558 del 15 novembre 2018 - n. 559 del 29 novembre 2018 - n. 560 del 7 dicembre 2018 - n. 564 del 27 dicembre 2018 (Toscana) - n. 568 del 16 gennaio 2019 (Liguria) - n. 575 dell'8 febbraio 2019 - n. 593 del 17 maggio 2019 (Liguria) - n. 601 del 1 agosto 2019 - n. 606 del 18 settembre 2019 - n. 613 del 5 novembre 2019 - n. 694 del 18 agosto 2020 (Marche) - n. 696 del 18 agosto 2020 - n. 727 del 28 dicembre 2020 - n. 769 del 16 aprile 2021 (Veneto) - n. 799 del 1° ottobre 2021 (Veneto) - n. 833 del 12 gennaio 2022 (chiusura Calabria) - n. 834 del 12 gennaio 2022 (chiusura Sardegna) - n.                                                                                                                                                                                                                                                                                                                                                                                                                                                                                                            |           |           |  |   |           |           |       |             |             |       |
| ITG13 | 1 | gennaio 2022 (chiusura Calabria) - n. 834 del 12 gennaio 2022 (chiusura Sardegna) - n.                                                                                                                                                                                                                                                                                                                                                                                                                                                                                                                                                                                                                                                                                                                                                                                                                                                                                                                                                                                                                                       | 10/5/2018 | 11/5/2018 |  | 3 | 11/8/2018 | 11/8/2021 | ##### | 119,622,517 | 471,347,390 | ##### |
|       |   | n. 558 del 15 novembre 2018 - n. 559 del 29 novembre 2018 - n. 560 del 7 dicembre 2018 - n. 564 del 27 dicembre 2018 (Toscana) - n. 568 del 16 gennaio 2019 (Liguria) - n. 575 dell'8 febbraio 2019 - n. 593 del 17 maggio 2019 (Liguria) - n. 601 del 1 agosto 2019 - n. 606 del 18 settembre 2019 - n. 613 del 5 novembre 2019 - n. 694 del 18 agosto 2020 (Marche) - n. 696 del 18 agosto 2020 - n. 727 del 28 dicembre 2020 - n. 769 del 16 aprile 2021 (Veneto) - n. 799 del 1° ottobre 2021 (Veneto) - n. 833 del 12 gennaio 2022 (chiusura Calabria) - n. 834 del 12 gennaio 2022 (chiusura Sardegna) - n.                                                                                                                                                                                                                                                                                                                                                                                                                                                                                                            |           |           |  |   |           |           |       | .46 €       | .66 €       |       |
|       |   | n. 558 del 15 novembre 2018 - n. 559 del 29 novembre 2018 - n. 560 del 7 dicembre 2018 - n. 564 del 27 dicembre 2018 (Toscana) - n. 568 del 16 gennaio 2019 (Liguria) - n. 575 dell'8 febbraio 2019 - n. 593 del 17 maggio 2019 (Liguria) - n. 601 del 1 agosto 2019 - n. 606 del 18 settembre 2019 - n. 613 del 5 novembre 2019 - n. 694 del 18 agosto 2020 (Marche) - n. 696 del 18 agosto 2020 - n. 727 del 28 dicembre 2020 - n. 769 del 16 aprile 2021 (Veneto) - n. 799 del 1° ottobre 2021 (Veneto) - n. 833 del 12 gennaio 2022 (chiusura Calabria) - n. 834 del 12 gennaio 2022 (chiusura Sardegna) - n.                                                                                                                                                                                                                                                                                                                                                                                                                                                                                                            |           |           |  |   |           |           |       |             |             |       |
| <hr/> |   |                                                                                                                                                                                                                                                                                                                                                                                                                                                                                                                                                                                                                                                                                                                                                                                                                                                                                                                                                                                                                                                                                                                              |           |           |  |   |           |           |       |             |             |       |

|       |   |                                                                                                                                                                                                                                                                                                                                                                                                                                                                                                                                                                                                                                                                                                                                                                                                                                                                                                                                                                                                                                                                                                                                                                                                                                                                                                  |           |           |   |           |           |       |             |             |
|-------|---|--------------------------------------------------------------------------------------------------------------------------------------------------------------------------------------------------------------------------------------------------------------------------------------------------------------------------------------------------------------------------------------------------------------------------------------------------------------------------------------------------------------------------------------------------------------------------------------------------------------------------------------------------------------------------------------------------------------------------------------------------------------------------------------------------------------------------------------------------------------------------------------------------------------------------------------------------------------------------------------------------------------------------------------------------------------------------------------------------------------------------------------------------------------------------------------------------------------------------------------------------------------------------------------------------|-----------|-----------|---|-----------|-----------|-------|-------------|-------------|
| ITG12 | 1 | 835 del 12 gennaio 2022 (chiusura Liguria) -<br>n. 836 del 12 gennaio 2022 (chiusura<br>Veneto) - n. 837 del 12 gennaio 2022<br>(chiusura Friuli-Venezia Giulia) - n. 838 del<br>12 gennaio 2022 (chiusura Toscana) - n. 840<br>del 12 gennaio 2022 (chiusura Emilia-<br>Romagna) - n. 850 del 3 febbraio 2022<br>(chiusura Lazio) - n. 857 del 3 febbraio 2022<br>(chiusura Sicilia) - n. 858 del 3 febbraio 2022<br>(chiusura Trento) - n. 859 del 3 febbraio<br>2022 (chiusura Lombardia) - n. 868 del 1<br>marzo 2022 (chiusura Bolzano)<br>n. 558 del 15 novembre 2018 - n. 559 del 29<br>novembre 2018 - n. 560 del 7 dicembre<br>2018 - n. 564 del 27 dicembre 2018<br>(Toscana) - n. 568 del 16 gennaio 2019<br>(Liguria) - n. 575 dell'8 febbraio 2019 - n. 593<br>del 17 maggio 2019 (Liguria) - n. 601 del 1<br>agosto 2019 - n. 606 del 18 settembre 2019 -<br>n. 613 del 5 novembre 2019 - n. 694 del 18<br>agosto 2020 (Marche) - n. 696 del 18 agosto<br>2020 - n. 727 del 28 dicembre 2020 - n. 769<br>del 16 aprile 2021 (Veneto) - n. 799 del 1°<br>ottobre 2021 (Veneto) - n. 833 del 12<br>gennaio 2022 (chiusura Calabria) - n. 834 del<br>12 gennaio 2022 (chiusura Sardegna) - n.                                                                                         | 10/5/2018 | 11/5/2018 | 3 | 11/8/2018 | 11/8/2021 | ##### | 119,622,517 | 471,347,390 |
|       |   |                                                                                                                                                                                                                                                                                                                                                                                                                                                                                                                                                                                                                                                                                                                                                                                                                                                                                                                                                                                                                                                                                                                                                                                                                                                                                                  |           |           |   |           |           |       |             | #####       |
| ITG18 | 1 | 835 del 12 gennaio 2022 (chiusura Liguria) -<br>n. 836 del 12 gennaio 2022 (chiusura<br>Veneto) - n. 837 del 12 gennaio 2022<br>(chiusura Friuli-Venezia Giulia) - n. 838 del<br>12 gennaio 2022 (chiusura Toscana) - n. 840<br>del 12 gennaio 2022 (chiusura Emilia-<br>Romagna) - n. 850 del 3 febbraio 2022<br>(chiusura Lazio) - n. 857 del 3 febbraio 2022<br>(chiusura Sicilia) - n. 858 del 3 febbraio 2022<br>(chiusura Trento) - n. 859 del 3 febbraio<br>2022 (chiusura Lombardia) - n. 868 del 1<br>marzo 2022 (chiusura Bolzano)<br>n. 558 del 15 novembre 2018 - n. 559 del 29<br>novembre 2018 - n. 560 del 7 dicembre<br>2018 - n. 564 del 27 dicembre 2018<br>(Toscana) - n. 568 del 16 gennaio 2019<br>(Liguria) - n. 575 dell'8 febbraio 2019 - n. 593<br>del 17 maggio 2019 (Liguria) - n. 601 del 1<br>agosto 2019 - n. 606 del 18 settembre 2019 -<br>n. 613 del 5 novembre 2019 - n. 694 del 18<br>agosto 2020 (Marche) - n. 696 del 18 agosto<br>2020 - n. 727 del 28 dicembre 2020 - n. 769<br>del 16 aprile 2021 (Veneto) - n. 799 del 1°<br>ottobre 2021 (Veneto) - n. 833 del 12<br>gennaio 2022 (chiusura Calabria) - n. 834 del<br>12 gennaio 2022 (chiusura Sardegna) - n.<br>835 del 12 gennaio 2022 (chiusura Liguria) -<br>n. 836 del 12 gennaio 2022 (chiusura | 10/5/2018 | 11/5/2018 | 3 | 11/8/2018 | 11/8/2021 | ##### | 119,622,517 | 471,347,390 |
|       |   |                                                                                                                                                                                                                                                                                                                                                                                                                                                                                                                                                                                                                                                                                                                                                                                                                                                                                                                                                                                                                                                                                                                                                                                                                                                                                                  |           |           |   |           |           |       |             | #####       |

|       |   |                                                                                                                                                                                                                                                                                                                                                                                                                                                                                                                                                                                                                                                                                                                                                                                                                                                                                                                                                                                                                                                                                                                                                                                                                                                                                                                                                                                                                                                                                                                                                                                                                                                                                                                                                                                                                                                                                                                                                                                                                                                                                                                                                                                                                                                                                                                                                    |           |           |   |           |           |       |                         |       |       |       |
|-------|---|----------------------------------------------------------------------------------------------------------------------------------------------------------------------------------------------------------------------------------------------------------------------------------------------------------------------------------------------------------------------------------------------------------------------------------------------------------------------------------------------------------------------------------------------------------------------------------------------------------------------------------------------------------------------------------------------------------------------------------------------------------------------------------------------------------------------------------------------------------------------------------------------------------------------------------------------------------------------------------------------------------------------------------------------------------------------------------------------------------------------------------------------------------------------------------------------------------------------------------------------------------------------------------------------------------------------------------------------------------------------------------------------------------------------------------------------------------------------------------------------------------------------------------------------------------------------------------------------------------------------------------------------------------------------------------------------------------------------------------------------------------------------------------------------------------------------------------------------------------------------------------------------------------------------------------------------------------------------------------------------------------------------------------------------------------------------------------------------------------------------------------------------------------------------------------------------------------------------------------------------------------------------------------------------------------------------------------------------------|-----------|-----------|---|-----------|-----------|-------|-------------------------|-------|-------|-------|
| ITG19 | 1 | Veneto) - n. 837 del 12 gennaio 2022 (chiusura Friuli-Venezia Giulia) - n. 838 del 12 gennaio 2022 (chiusura Toscana) - n. 840 del 12 gennaio 2022 (chiusura Emilia-Romagna) - n. 850 del 3 febbraio 2022 (chiusura Lazio) - n. 857 del 3 febbraio 2022 (chiusura Sicilia) - n. 858 del 3 febbraio 2022 (chiusura Trento) - n. 859 del 3 febbraio 2022 (chiusura Lombardia) - n. 868 del 1 marzo 2022 (chiusura Bolzano)<br>n. 558 del 15 novembre 2018 - n. 559 del 29 novembre 2018 - n. 560 del 7 dicembre 2018 - n. 564 del 27 dicembre 2018 (Toscana) - n. 568 del 16 gennaio 2019 (Liguria) - n. 575 dell'8 febbraio 2019 - n. 593 del 17 maggio 2019 (Liguria) - n. 601 del 1 agosto 2019 - n. 606 del 18 settembre 2019 - n. 613 del 5 novembre 2019 - n. 694 del 18 agosto 2020 (Marche) - n. 696 del 18 agosto 2020 - n. 727 del 28 dicembre 2020 - n. 769 del 16 aprile 2021 (Veneto) - n. 799 del 1° ottobre 2021 (Veneto) - n. 833 del 12 gennaio 2022 (chiusura Calabria) - n. 834 del 12 gennaio 2022 (chiusura Sardegna) - n. 835 del 12 gennaio 2022 (chiusura Liguria) - n. 836 del 12 gennaio 2022 (chiusura Veneto) - n. 837 del 12 gennaio 2022 (chiusura Friuli-Venezia Giulia) - n. 838 del 12 gennaio 2022 (chiusura Toscana) - n. 840 del 12 gennaio 2022 (chiusura Emilia-Romagna) - n. 850 del 3 febbraio 2022 (chiusura Lazio) - n. 857 del 3 febbraio 2022 (chiusura Sicilia) - n. 858 del 3 febbraio 2022 (chiusura Trento) - n. 859 del 3 febbraio 2022 (chiusura Lombardia) - n. 868 del 1 marzo 2022 (chiusura Bolzano)<br>n. 558 del 15 novembre 2018 - n. 559 del 29 novembre 2018 - n. 560 del 7 dicembre 2018 - n. 564 del 27 dicembre 2018 (Toscana) - n. 568 del 16 gennaio 2019 (Liguria) - n. 575 dell'8 febbraio 2019 - n. 593 del 17 maggio 2019 (Liguria) - n. 601 del 1 agosto 2019 - n. 606 del 18 settembre 2019 - n. 613 del 5 novembre 2019 - n. 694 del 18 agosto 2020 (Marche) - n. 696 del 18 agosto 2020 - n. 727 del 28 dicembre 2020 - n. 769 del 16 aprile 2021 (Veneto) - n. 799 del 1° ottobre 2021 (Veneto) - n. 833 del 12 gennaio 2022 (chiusura Calabria) - n. 834 del 12 gennaio 2022 (chiusura Sardegna) - n. 835 del 12 gennaio 2022 (chiusura Liguria) - n. 836 del 12 gennaio 2022 (chiusura Veneto) - n. 837 del 12 gennaio 2022 (chiusura Friuli-Venezia Giulia) - n. 838 del | 10/5/2018 | 11/5/2018 | 3 | 11/8/2018 | 11/8/2021 | ##### | 119,622,517,471,347,390 | ##### | .46 € | .66 € |
|       |   |                                                                                                                                                                                                                                                                                                                                                                                                                                                                                                                                                                                                                                                                                                                                                                                                                                                                                                                                                                                                                                                                                                                                                                                                                                                                                                                                                                                                                                                                                                                                                                                                                                                                                                                                                                                                                                                                                                                                                                                                                                                                                                                                                                                                                                                                                                                                                    |           |           |   |           |           |       |                         |       |       |       |
| ITG11 | 1 | agosto 2020 (Marche) - n. 696 del 18 agosto 2020 - n. 727 del 28 dicembre 2020 - n. 769 del 16 aprile 2021 (Veneto) - n. 799 del 1° ottobre 2021 (Veneto) - n. 833 del 12 gennaio 2022 (chiusura Calabria) - n. 834 del 12 gennaio 2022 (chiusura Sardegna) - n. 835 del 12 gennaio 2022 (chiusura Liguria) - n. 836 del 12 gennaio 2022 (chiusura Veneto) - n. 837 del 12 gennaio 2022 (chiusura Friuli-Venezia Giulia) - n. 838 del                                                                                                                                                                                                                                                                                                                                                                                                                                                                                                                                                                                                                                                                                                                                                                                                                                                                                                                                                                                                                                                                                                                                                                                                                                                                                                                                                                                                                                                                                                                                                                                                                                                                                                                                                                                                                                                                                                              | 10/5/2018 | 11/5/2018 | 3 | 11/8/2018 | 11/8/2021 | ##### | 119,622,517,471,347,390 | ##### | .46 € | .66 € |
|       |   |                                                                                                                                                                                                                                                                                                                                                                                                                                                                                                                                                                                                                                                                                                                                                                                                                                                                                                                                                                                                                                                                                                                                                                                                                                                                                                                                                                                                                                                                                                                                                                                                                                                                                                                                                                                                                                                                                                                                                                                                                                                                                                                                                                                                                                                                                                                                                    |           |           |   |           |           |       |                         |       |       |       |

[illegible]

|       |   |                                                                                                                                |           |           |           |           |           |           |   |            |            |                 |                |                 |
|-------|---|--------------------------------------------------------------------------------------------------------------------------------|-----------|-----------|-----------|-----------|-----------|-----------|---|------------|------------|-----------------|----------------|-----------------|
| ITH59 | 1 | n. 600 del 26 luglio 2019 - n. 681 dell'11 giugno 2020 - n. 730 del 29 dicembre 2020 - n. 795 del 20 settembre 2021 (chiusura) | 5/4/2019  | 5/6/2019  | 5/12/2019 | 5/14/2019 | 5/17/2019 | 5/20/2019 | 1 | 6/26/2019  | 6/26/2021  | 32,476,509.27 € | 180,781.84 €   | 2,738,355.60 €  |
| ITC14 | 1 | n. 620 del 6 dicembre 2019 - n. 802 del 22 ottobre 2021 (chiusura)                                                             | 6/11/2019 | 6/11/2019 | 8/12/2019 | 8/12/2019 |           |           | 1 | 11/6/2019  | 5/6/2021   | 2,234,950.00 €  | 70,000.00 €    | 70,000.00 €     |
| ITH55 | 1 | n. 605 del 2 settembre 2019 - n. 797 del 23 settembre 2021 (chiusura)                                                          | 6/22/2019 | 6/22/2019 | 7/1/2019  | 7/3/2019  | 7/8/2019  | 7/10/2019 | 1 | 8/6/2019   | 8/6/2021   | 8,670,513.47 €  | 4,554,551.24 € | 8,913,873.86 €  |
| ITH58 | 0 | n. 605 del 2 settembre 2019 - n. 797 del 23 settembre 2021 (chiusura)                                                          | 6/22/2019 | 6/22/2019 | 7/1/2019  | 7/3/2019  | 7/8/2019  | 7/10/2019 | 1 | 8/6/2019   | 8/6/2021   | 8,670,513.47 €  | 4,554,551.24 € | 8,913,873.86 €  |
| ITH56 | 0 | n. 605 del 2 settembre 2019 - n. 797 del 23 settembre 2021 (chiusura)                                                          | 6/22/2019 | 6/22/2019 | 7/1/2019  | 7/3/2019  | 7/8/2019  | 7/10/2019 | 1 | 8/6/2019   | 8/6/2021   | 8,670,513.47 €  | 4,554,551.24 € | 8,913,873.86 €  |
| ITH54 | 1 | n. 605 del 2 settembre 2019 - n. 797 del 23 settembre 2021 (chiusura)                                                          | 6/22/2019 | 6/22/2019 | 7/1/2019  | 7/3/2019  | 7/8/2019  | 7/10/2019 | 1 | 8/6/2019   | 8/6/2021   | 8,670,513.47 €  | 4,554,551.24 € | 8,913,873.86 €  |
| ITH51 | 0 | n. 605 del 2 settembre 2019 - n. 797 del 23 settembre 2021 (chiusura)                                                          | 6/22/2019 | 6/22/2019 | 7/1/2019  | 7/3/2019  | 7/8/2019  | 7/10/2019 | 1 | 8/6/2019   | 8/6/2021   | 8,670,513.47 €  | 4,554,551.24 € | 8,913,873.86 €  |
| ITH52 | 0 | n. 605 del 2 settembre 2019 - n. 797 del 23 settembre 2021 (chiusura)                                                          | 6/22/2019 | 6/22/2019 | 7/1/2019  | 7/3/2019  | 7/8/2019  | 7/10/2019 | 1 | 8/6/2019   | 8/6/2021   | 8,670,513.47 €  | 4,554,551.24 € | 8,913,873.86 €  |
| ITH57 | 0 | n. 605 del 2 settembre 2019 - n. 797 del 23 settembre 2021 (chiusura)                                                          | 6/22/2019 | 6/22/2019 | 7/1/2019  | 7/3/2019  | 7/8/2019  | 7/10/2019 | 1 | 8/6/2019   | 8/6/2021   | 8,670,513.47 €  | 4,554,551.24 € | 8,913,873.86 €  |
| ITH53 | 1 | n. 605 del 2 settembre 2019 - n. 797 del 23 settembre 2021 (chiusura)                                                          | 6/22/2019 | 6/22/2019 | 7/1/2019  | 7/3/2019  | 7/8/2019  | 7/10/2019 | 1 | 8/6/2019   | 8/6/2021   | 8,670,513.47 €  | 4,554,551.24 € | 8,913,873.86 €  |
| ITC46 | 0 | n. 598 del 25 luglio 2019 - n. 796 del 23 settembre 2021 (chiusura)                                                            | 7/25/2019 | 8/12/2019 |           |           |           |           | 1 | 7/1/2019   | 7/1/2021   | 25,875,000.00 € | 2,795,400.85 € | 3,637,694.88 €  |
| ITC47 | 1 | n. 598 del 25 luglio 2019 - n. 796 del 23 settembre 2021 (chiusura)                                                            | 7/25/2019 | 8/12/2019 |           |           |           |           | 1 | 7/1/2019   | 7/1/2021   | 25,875,000.00 € | 2,795,400.85 € | 3,637,694.88 €  |
| ITC42 | 0 | n. 598 del 25 luglio 2019 - n. 796 del 23 settembre 2021 (chiusura)                                                            | 7/25/2019 | 8/12/2019 |           |           |           |           | 1 | 7/1/2019   | 7/1/2021   | 25,875,000.00 € | 2,795,400.85 € | 3,637,694.88 €  |
| ITC4A | 0 | n. 598 del 25 luglio 2019 - n. 796 del 23 settembre 2021 (chiusura)                                                            | 7/25/2019 | 8/12/2019 |           |           |           |           | 1 | 7/1/2019   | 7/1/2021   | 25,875,000.00 € | 2,795,400.85 € | 3,637,694.88 €  |
| ITC43 | 1 | n. 598 del 25 luglio 2019 - n. 796 del 23 settembre 2021 (chiusura)                                                            | 7/25/2019 | 8/12/2019 |           |           |           |           | 1 | 7/1/2019   | 7/1/2021   | 25,875,000.00 € | 2,795,400.85 € | 3,637,694.88 €  |
| ITC49 | 0 | n. 598 del 25 luglio 2019 - n. 796 del 23 settembre 2021 (chiusura)                                                            | 7/25/2019 | 8/12/2019 |           |           |           |           | 1 | 7/1/2019   | 7/1/2021   | 25,875,000.00 € | 2,795,400.85 € | 3,637,694.88 €  |
| ITC4B | 0 | n. 598 del 25 luglio 2019 - n. 796 del 23 settembre 2021 (chiusura)                                                            | 7/25/2019 | 8/12/2019 |           |           |           |           | 1 | 7/1/2019   | 7/1/2021   | 25,875,000.00 € | 2,795,400.85 € | 3,637,694.88 €  |
| ITC4C | 0 | n. 598 del 25 luglio 2019 - n. 796 del 23 settembre 2021 (chiusura)                                                            | 7/25/2019 | 8/12/2019 |           |           |           |           | 1 | 7/1/2019   | 7/1/2021   | 25,875,000.00 € | 2,795,400.85 € | 3,637,694.88 €  |
| ITC48 | 0 | n. 598 del 25 luglio 2019 - n. 796 del 23 settembre 2021 (chiusura)                                                            | 7/25/2019 | 8/12/2019 |           |           |           |           | 1 | 7/1/2019   | 7/1/2021   | 25,875,000.00 € | 2,795,400.85 € | 3,637,694.88 €  |
| ITC44 | 1 | n. 598 del 25 luglio 2019 - n. 796 del 23 settembre 2021 (chiusura)                                                            | 7/25/2019 | 8/12/2019 |           |           |           |           | 1 | 7/1/2019   | 7/1/2021   | 25,875,000.00 € | 2,795,400.85 € | 3,637,694.88 €  |
| ITC41 | 0 | n. 598 del 25 luglio 2019 - n. 796 del 23 settembre 2021 (chiusura)                                                            | 7/25/2019 | 8/12/2019 |           |           |           |           | 1 | 7/1/2019   | 7/1/2021   | 25,875,000.00 € | 2,795,400.85 € | 3,637,694.88 €  |
| ITI18 | 1 | n. 611 del 17 ottobre 2019 - n. 812 del 29 novembre 2021 (chiusura)                                                            | 7/27/2019 | 7/28/2019 |           |           |           |           | 1 | 9/19/2019  | 9/19/2021  | 10,850,000.00 € | 771,318.17 €   | 2,179,079.76 €  |
| ITI19 | 1 | n. 611 del 17 ottobre 2019 - n. 812 del 29 novembre 2021 (chiusura)                                                            | 7/27/2019 | 7/28/2019 |           |           |           |           | 1 | 9/19/2019  | 9/19/2021  | 10,850,000.00 € | 771,318.17 €   | 2,179,079.76 €  |
| ITG11 | 1 | n. 619 del 5 dicembre 2019 - n. 807 del 9 novembre 2021 - n. 863 del 24 febbraio 2022 (chiusura)                               | 9/1/2019  | 9/30/2019 |           |           |           |           | 3 | 11/21/2019 | 11/21/2021 | 10,250,000.00 € | 4,367,507.43 € | 24,740,254.44 € |
| ITG12 | 1 | n. 619 del 5 dicembre 2019 - n. 807 del 9 novembre 2021 - n. 863 del 24 febbraio 2022 (chiusura)                               | 9/1/2019  | 9/30/2019 |           |           |           |           | 3 | 11/21/2019 | 11/21/2021 | 10,250,000.00 € | 4,367,507.43 € | 24,740,254.44 € |

|       |   |                                                                                                                                                                                                                                                                                                                                                                                                                                                                                                                                                                                                                                                                                                                                                                                                                                                                                                                                                           |            |            |            |            |   |            |            |                 |                |                 |
|-------|---|-----------------------------------------------------------------------------------------------------------------------------------------------------------------------------------------------------------------------------------------------------------------------------------------------------------------------------------------------------------------------------------------------------------------------------------------------------------------------------------------------------------------------------------------------------------------------------------------------------------------------------------------------------------------------------------------------------------------------------------------------------------------------------------------------------------------------------------------------------------------------------------------------------------------------------------------------------------|------------|------------|------------|------------|---|------------|------------|-----------------|----------------|-----------------|
| ITG13 | 1 | n. 619 del 5 dicembre 2019 - n. 807 del 9 novembre 2021 - n. 863 del 24 febbraio 2022 (chiusura)                                                                                                                                                                                                                                                                                                                                                                                                                                                                                                                                                                                                                                                                                                                                                                                                                                                          | 9/1/2019   | 9/30/2019  |            |            | 3 | 11/21/2019 | 11/21/2021 | 10,250,000.00 € | 4,367,507.43 € | 24,740,254.44 € |
| ITG14 | 1 | n. 619 del 5 dicembre 2019 - n. 807 del 9 novembre 2021 - n. 863 del 24 febbraio 2022 (chiusura)                                                                                                                                                                                                                                                                                                                                                                                                                                                                                                                                                                                                                                                                                                                                                                                                                                                          | 9/1/2019   | 9/30/2019  |            |            | 3 | 11/21/2019 | 11/21/2021 | 10,250,000.00 € | 4,367,507.43 € | 24,740,254.44 € |
| ITG16 | 1 | n. 619 del 5 dicembre 2019 - n. 807 del 9 novembre 2021 - n. 863 del 24 febbraio 2022 (chiusura)                                                                                                                                                                                                                                                                                                                                                                                                                                                                                                                                                                                                                                                                                                                                                                                                                                                          | 9/1/2019   | 9/30/2019  |            |            | 3 | 11/21/2019 | 11/21/2021 | 10,250,000.00 € | 4,367,507.43 € | 24,740,254.44 € |
| ITG17 | 1 | n. 619 del 5 dicembre 2019 - n. 807 del 9 novembre 2021 - n. 863 del 24 febbraio 2022 (chiusura)                                                                                                                                                                                                                                                                                                                                                                                                                                                                                                                                                                                                                                                                                                                                                                                                                                                          | 9/1/2019   | 9/30/2019  |            |            | 3 | 11/21/2019 | 11/21/2021 | 10,250,000.00 € | 4,367,507.43 € | 24,740,254.44 € |
| ITG18 | 1 | n. 619 del 5 dicembre 2019 - n. 807 del 9 novembre 2021 - n. 863 del 24 febbraio 2022 (chiusura)                                                                                                                                                                                                                                                                                                                                                                                                                                                                                                                                                                                                                                                                                                                                                                                                                                                          | 9/1/2019   | 9/30/2019  |            |            | 3 | 11/21/2019 | 11/21/2021 | 10,250,000.00 € | 4,367,507.43 € | 24,740,254.44 € |
| ITG19 | 1 | n. 619 del 5 dicembre 2019 - n. 807 del 9 novembre 2021 - n. 863 del 24 febbraio 2022 (chiusura)                                                                                                                                                                                                                                                                                                                                                                                                                                                                                                                                                                                                                                                                                                                                                                                                                                                          | 9/1/2019   | 9/30/2019  |            |            | 3 | 11/21/2019 | 11/21/2021 | 10,250,000.00 € | 4,367,507.43 € | 24,740,254.44 € |
| ITC18 | 1 | n. 615 del 16 novembre 2019 - n. 622 del 17 dicembre 2019 - n. 674 del 15 maggio 2020 - n. 687 del 28 luglio 2020 - n. 731 del 31 dicembre 2020 - n. 753 del 19 marzo 2021 - n. 807 del 9 novembre 2021 - n. 809 del 25 novembre 2021 - n. 814 del 9 dicembre 2021 - n. 819 del 4 gennaio 2022 (chiusura Veneto) - n. 820 del 4 gennaio 2022 (chiusura Calabria) - n. 821 del 4 gennaio 2022 (chiusura Marche) - n. 822 del 4 gennaio 2022 (chiusura Emilia-Romagna) - n. 826 del 4 gennaio 2022 (chiusura Friuli-Venezia Giulia) n. 827 del 4 gennaio 2022 (chiusura Basilicata) - n. 828 del 4 gennaio 2022 (chiusura Puglia) - n. 829 del 4 gennaio 2022 (chiusura Piemonte) - n. 830 del 4 gennaio 2022 (chiusura Campania) - n. 831 del 4 gennaio 2022 (chiusura Liguria) - n. 839 del 12 gennaio 2022 - n. 855 del 01 febbraio 2022 (chiusura Abruzzo) - n. 860 del 3 febbraio 2022 (chiusura Toscana) - n. 878 del 25 marzo 2022 (chiusura Marche) | 10/19/2019 | 10/22/2019 | 11/22/2019 | 11/25/2019 | 1 | 11/14/2019 | 11/14/2021 | #####<br>#####  | 4,565,532.10 € | 10,102,152.67 € |
| ITC13 | 1 | n. 615 del 16 novembre 2019 - n. 622 del 17 dicembre 2019 - n. 674 del 15 maggio 2020 - n. 687 del 28 luglio 2020 - n. 731 del 31 dicembre 2020 - n. 753 del 19 marzo 2021 - n. 807 del 9 novembre 2021 - n. 809 del 25 novembre 2021 - n. 814 del 9 dicembre 2021 - n. 819 del 4 gennaio 2022 (chiusura Veneto) - n. 820 del 4 gennaio 2022 (chiusura Calabria) - n. 821 del 4 gennaio 2022 (chiusura Marche) - n. 822 del 4 gennaio 2022 (chiusura Emilia-Romagna) - n. 826 del 4 gennaio 2022 (chiusura Friuli-Venezia Giulia) n. 827 del 4 gennaio 2022 (chiusura Basilicata) - n. 828 del 4 gennaio                                                                                                                                                                                                                                                                                                                                                  | 10/19/2019 | 10/22/2019 | 11/22/2019 | 11/25/2019 | 1 | 11/14/2019 | 11/14/2021 | #####<br>#####  | 4,565,532.10 € | 10,102,152.67 € |

|       |   |                                                                                                                                                                                                                                                                                                                                                                                                                                                                                                                                                                                                                                                                                                                                                                                                                                                                                                                                                                                                                                                                                                                                                                                                                                                                                                                                                                                                                                                                                                                                                                                                                                                                                                                                                                                                                                                                                                                                                                                                                                                                                                                                                                                                                                                                                                                                                                                                                                                                                                                     |            |            |            |   |            |            |       |             |             |  |
|-------|---|---------------------------------------------------------------------------------------------------------------------------------------------------------------------------------------------------------------------------------------------------------------------------------------------------------------------------------------------------------------------------------------------------------------------------------------------------------------------------------------------------------------------------------------------------------------------------------------------------------------------------------------------------------------------------------------------------------------------------------------------------------------------------------------------------------------------------------------------------------------------------------------------------------------------------------------------------------------------------------------------------------------------------------------------------------------------------------------------------------------------------------------------------------------------------------------------------------------------------------------------------------------------------------------------------------------------------------------------------------------------------------------------------------------------------------------------------------------------------------------------------------------------------------------------------------------------------------------------------------------------------------------------------------------------------------------------------------------------------------------------------------------------------------------------------------------------------------------------------------------------------------------------------------------------------------------------------------------------------------------------------------------------------------------------------------------------------------------------------------------------------------------------------------------------------------------------------------------------------------------------------------------------------------------------------------------------------------------------------------------------------------------------------------------------------------------------------------------------------------------------------------------------|------------|------------|------------|---|------------|------------|-------|-------------|-------------|--|
|       |   | 2022 (chiusura Puglia) - n. 829 del 4 gennaio<br>2022 (chiusura Piemonte) - n. 830 del 4<br>gennaio 2022 (chiusura Campania) - n. 831<br>del 4 gennaio 2022 (chiusura Liguria) - n.<br>839 del 12 gennaio 2022 - n. 855 del 01<br>febbraio 2022 (chiusura Abruzzo) - n. 860<br>del 3 febbraio 2022 (chiusura Toscana) - n.<br>878 del 25 marzo 2022 (chiusura Marche)<br>n. 615 del 16 novembre 2019 - n. 622 del 17<br>dicembre 2019 - n. 674 del 15 maggio 2020 -<br>687 del 28 luglio 2020 - n. 731 del 31<br>dicembre 2020 - n. 753 del 19 marzo 2021 -<br>n. 807 del 9 novembre 2021 - n. 809 del 25<br>novembre 2021 - n. 814 del 9 dicembre<br>2021 - n. 819 del 4 gennaio 2022 (chiusura<br>Veneto) - n. 820 del 4 gennaio 2022<br>(chiusura Calabria) - n. 821 del 4 gennaio<br>2022 (chiusura Marche) - n. 822 del 4<br>gennaio 2022 (chiusura Emilia-Romagna) -<br>n. 826 del 4 gennaio 2022 (chiusura Friuli-<br>Vnezia Giulia) n. 827 del 4 gennio 2022<br>(chiusura Basilicata) - n. 828 del 4 gennaio<br>2022 (chiusura Puglia) - n. 829 del 4 gennaio<br>2022 (chiusura Piemonte) - n. 830 del 4<br>gennaio 2022 (chiusura Campania) - n. 831<br>del 4 gennaio 2022 (chiusura Liguria) - n.<br>839 del 12 gennaio 2022 - n. 855 del 01<br>febbraio 2022 (chiusura Abruzzo) - n. 860<br>del 3 febbraio 2022 (chiusura Toscana) - n.<br>878 del 25 marzo 2022 (chiusura Marche)<br>n. 615 del 16 novembre 2019 - n. 622 del 17<br>dicembre 2019 - n. 674 del 15 maggio 2020 -<br>687 del 28 luglio 2020 - n. 731 del 31<br>dicembre 2020 - n. 753 del 19 marzo 2021 -<br>n. 807 del 9 novembre 2021 - n. 809 del 25<br>novembre 2021 - n. 814 del 9 dicembre<br>2021 - n. 819 del 4 gennaio 2022 (chiusura<br>Veneto) - n. 820 del 4 gennaio 2022<br>(chiusura Calabria) - n. 821 del 4 gennaio<br>2022 (chiusura Marche) - n. 822 del 4<br>gennaio 2022 (chiusura Emilia-Romagna) -<br>n. 826 del 4 gennaio 2022 (chiusura Friuli-<br>Vnezia Giulia) n. 827 del 4 gennio 2022<br>(chiusura Basilicata) - n. 828 del 4 gennaio<br>2022 (chiusura Puglia) - n. 829 del 4 gennaio<br>2022 (chiusura Piemonte) - n. 830 del 4<br>gennaio 2022 (chiusura Campania) - n. 831<br>del 4 gennaio 2022 (chiusura Liguria) - n.<br>839 del 12 gennaio 2022 - n. 855 del 01<br>febbraio 2022 (chiusura Abruzzo) - n. 860<br>del 3 febbraio 2022 (chiusura Toscana) - n.<br>878 del 25 marzo 2022 (chiusura Marche)<br>n. 615 del 16 novembre 2019 - n. 622 del 17<br>dicembre 2019 - n. 674 del 15 maggio 2020 - |            |            |            |   |            |            |       |             |             |  |
| ITC16 | 1 | 10/19/2019                                                                                                                                                                                                                                                                                                                                                                                                                                                                                                                                                                                                                                                                                                                                                                                                                                                                                                                                                                                                                                                                                                                                                                                                                                                                                                                                                                                                                                                                                                                                                                                                                                                                                                                                                                                                                                                                                                                                                                                                                                                                                                                                                                                                                                                                                                                                                                                                                                                                                                          | 10/22/2019 | 11/22/2019 | 11/25/2019 | 1 | 11/14/2019 | 11/14/2021 | ##### | 4,565,532.1 | 10,102,152. |  |
|       |   |                                                                                                                                                                                                                                                                                                                                                                                                                                                                                                                                                                                                                                                                                                                                                                                                                                                                                                                                                                                                                                                                                                                                                                                                                                                                                                                                                                                                                                                                                                                                                                                                                                                                                                                                                                                                                                                                                                                                                                                                                                                                                                                                                                                                                                                                                                                                                                                                                                                                                                                     |            |            |            |   |            |            | ##### | 0 €         | 67 €        |  |
| ITC11 | 1 | 10/19/2019                                                                                                                                                                                                                                                                                                                                                                                                                                                                                                                                                                                                                                                                                                                                                                                                                                                                                                                                                                                                                                                                                                                                                                                                                                                                                                                                                                                                                                                                                                                                                                                                                                                                                                                                                                                                                                                                                                                                                                                                                                                                                                                                                                                                                                                                                                                                                                                                                                                                                                          | 10/22/2019 | 11/22/2019 | 11/25/2019 | 1 | 11/14/2019 | 11/14/2021 | ##### | 4,565,532.1 | 10,102,152. |  |
|       |   |                                                                                                                                                                                                                                                                                                                                                                                                                                                                                                                                                                                                                                                                                                                                                                                                                                                                                                                                                                                                                                                                                                                                                                                                                                                                                                                                                                                                                                                                                                                                                                                                                                                                                                                                                                                                                                                                                                                                                                                                                                                                                                                                                                                                                                                                                                                                                                                                                                                                                                                     |            |            |            |   |            |            | ##### | 0 €         | 67 €        |  |
| ITC12 | 1 | 10/19/2019                                                                                                                                                                                                                                                                                                                                                                                                                                                                                                                                                                                                                                                                                                                                                                                                                                                                                                                                                                                                                                                                                                                                                                                                                                                                                                                                                                                                                                                                                                                                                                                                                                                                                                                                                                                                                                                                                                                                                                                                                                                                                                                                                                                                                                                                                                                                                                                                                                                                                                          | 10/22/2019 | 11/22/2019 | 11/25/2019 | 1 | 11/14/2019 | 11/14/2021 | ##### | 4,565,532.1 | 10,102,152. |  |
|       |   |                                                                                                                                                                                                                                                                                                                                                                                                                                                                                                                                                                                                                                                                                                                                                                                                                                                                                                                                                                                                                                                                                                                                                                                                                                                                                                                                                                                                                                                                                                                                                                                                                                                                                                                                                                                                                                                                                                                                                                                                                                                                                                                                                                                                                                                                                                                                                                                                                                                                                                                     |            |            |            |   |            |            | ##### | 0 €         | 67 €        |  |

[illegible]



|  |  |                                                                                                                                                                                                                                                                                                                                                                                                                                                                                                                                                                                                                                                                                                                                                                                                                                                                  |  |  |  |  |  |  |  |  |  |  |  |  |  |  |  |  |  |  |  |  |  |  |  |  |  |  |  |  |  |  |  |  |  |  |  |  |  |  |  |  |  |  |  |  |  |  |  |  |  |  |  |  |  |  |  |  |  |  |  |  |  |  |  |  |  |  |  |  |  |  |  |  |  |  |  |  |  |  |  |  |  |  |  |  |  |  |  |  |  |  |  |  |  |  |  |  |  |  |  |  |  |  |  |  |  |  |  |  |  |  |  |  |  |  |  |  |  |  |  |  |  |  |  |  |  |  |  |  |  |  |  |  |  |  |  |  |  |  |  |  |  |  |  |  |  |  |  |  |  |  |  |  |  |  |  |  |  |  |  |  |  |  |  |  |  |  |  |  |  |  |  |  |  |  |  |  |  |  |  |  |  |  |  |  |  |  |  |  |  |  |  |  |  |  |  |  |  |  |  |  |  |  |  |  |  |  |  |  |  |  |  |  |  |  |  |  |  |  |  |  |  |  |  |  |  |  |  |  |  |  |  |  |  |  |  |  |  |  |  |  |  |  |  |  |  |  |  |  |  |  |  |  |  |  |  |  |  |  |  |  |  |  |  |  |  |  |  |  |  |  |  |  |  |  |  |  |  |  |  |  |  |  |  |  |  |  |  |  |  |  |  |  |  |  |  |  |  |  |  |  |  |  |  |  |  |  |  |  |  |  |  |  |  |  |  |  |  |  |  |  |  |  |  |  |  |  |  |  |  |  |  |  |  |  |  |  |  |  |  |  |  |  |  |  |  |  |  |  |  |  |  |  |  |  |  |  |  |  |  |  |  |  |  |  |  |  |  |  |  |  |  |  |  |  |  |  |  |  |  |  |  |  |  |  |  |  |  |  |  |  |  |  |  |  |  |  |  |  |  |  |  |  |  |  |  |  |  |  |  |  |  |  |  |  |  |  |  |  |  |  |  |  |  |  |  |  |  |  |  |  |  |  |  |  |  |  |  |  |  |  |  |  |  |  |  |  |  |  |  |  |  |  |  |  |  |  |  |  |  |  |  |  |  |  |  |  |  |  |  |  |  |  |  |  |  |  |  |  |  |  |  |  |  |  |  |  |  |  |  |  |  |  |  |  |  |  |  |  |  |  |  |  |  |  |  |  |  |  |  |  |  |  |  |  |  |  |  |  |  |  |  |  |  |  |  |  |  |  |  |  |  |  |  |  |  |  |  |  |  |  |  |  |  |  |  |  |  |  |  |  |  |  |  |  |  |  |  |  |  |  |  |  |  |  |  |  |  |  |  |  |  |  |  |  |  |  |  |  |  |  |  |  |  |  |  |  |  |  |  |  |  |  |  |  |  |  |  |  |  |  |  |  |  |  |  |  |  |  |  |  |  |  |  |  |  |  |  |  |  |  |  |  |  |  |  |  |  |  |  |  |  |  |  |  |  |  |  |  |  |  |  |  |  |  |  |  |  |  |  |  |  |  |  |  |  |  |  |  |  |  |  |  |  |  |  |  |  |  |  |  |  |  |  |  |  |  |  |  |  |  |  |  |  |  |  |  |  |  |  |  |  |  |  |  |  |  |  |  |  |  |  |  |  |  |  |  |  |  |  |  |  |  |  |  |  |  |  |  |  |  |  |  |  |  |  |  |  |  |  |  |  |  |  |  |  |  |  |  |  |  |  |  |  |  |  |  |  |  |  |  |  |  |  |  |  |  |  |  |  |  |  |  |  |  |  |  |  |  |  |  |  |  |  |  |  |  |  |  |  |  |  |  |  |  |  |  |  |  |  |  |  |  |  |  |  |  |  |  |  |  |  |  |  |  |  |  |  |  |  |  |  |  |  |  |  |  |  |  |  |  |  |  |  |  |  |  |  |  |  |  |  |  |  |  |  |  |  |  |  |  |  |  |  |  |  |  |  |  |  |  |  |  |  |  |  |  |  |  |  |  |  |  |  |  |  |  |  |  |  |  |  |  |  |  |  |  |  |  |  |  |  |  |  |  |  |  |  |  |  |  |  |  |  |  |  |  |  |  |  |  |  |  |  |  |  |  |  |  |  |  |  |  |  |  |  |  |  |  |  |  |  |  |  |  |  |  |  |  |  |  |  |  |  |  |  |  |  |  |  |  |  |  |  |  |  |  |  |  |  |  |  |  |  |  |  |  |  |  |  |  |  |  |  |  |  |  |  |  |  |  |  |  |  |  |  |  |  |  |  |  |  |  |  |  |  |  |  |  |  |  |  |  |  |  |  |  |  |  |  |  |  |  |  |  |  |  |  |  |  |  |  |  |  |  |  |  |  |  |  |  |  |  |  |  |  |  |  |  |  |  |  |  |  |  |  |  |  |  |  |  |  |  |  |  |  |  |  |  |  |  |  |  |  |  |  |  |  |  |  |  |  |  |  |  |  |  |  |  |  |  |  |  |  |  |  |  |  |  |  |  |  |  |  |  |  |  |  |  |  |  |  |  |  |  |  |  |  |  |  |  |  |  |  |  |  |  |  |  |  |  |  |  |  |  |  |  |  |  |  |  |  |  |  |  |  |  |  |  |  |  |  |  |  |  |  |  |  |  |  |  |  |  |  |  |  |  |  |  |  |  |  |  |  |  |  |  |  |  |  |  |  |  |  |  |  |  |  |  |  |  |  |  |  |  |  |  |  |  |  |  |  |  |  |  |  |  |  |  |  |  |  |  |  |  |  |  |  |  |  |  |  |  |  |  |  |  |  |  |  |  |  |  |  |  |  |  |  |  |  |  |  |  |  |  |  |  |  |  |  |  |  |  |  |  |  |  |  |  |  |  |  |  |  |  |  |  |  |  |  |  |  |  |  |  |  |  |  |  |  |  |  |  |  |  |  |  |  |  |  |  |  |  |  |  |  |  |  |  |  |  |  |  |  |  |  |  |  |  |  |  |  |  |  |  |  |  |  |  |  |  |  |  |  |  |  |    |
|--|--|------------------------------------------------------------------------------------------------------------------------------------------------------------------------------------------------------------------------------------------------------------------------------------------------------------------------------------------------------------------------------------------------------------------------------------------------------------------------------------------------------------------------------------------------------------------------------------------------------------------------------------------------------------------------------------------------------------------------------------------------------------------------------------------------------------------------------------------------------------------|--|--|--|--|--|--|--|--|--|--|--|--|--|--|--|--|--|--|--|--|--|--|--|--|--|--|--|--|--|--|--|--|--|--|--|--|--|--|--|--|--|--|--|--|--|--|--|--|--|--|--|--|--|--|--|--|--|--|--|--|--|--|--|--|--|--|--|--|--|--|--|--|--|--|--|--|--|--|--|--|--|--|--|--|--|--|--|--|--|--|--|--|--|--|--|--|--|--|--|--|--|--|--|--|--|--|--|--|--|--|--|--|--|--|--|--|--|--|--|--|--|--|--|--|--|--|--|--|--|--|--|--|--|--|--|--|--|--|--|--|--|--|--|--|--|--|--|--|--|--|--|--|--|--|--|--|--|--|--|--|--|--|--|--|--|--|--|--|--|--|--|--|--|--|--|--|--|--|--|--|--|--|--|--|--|--|--|--|--|--|--|--|--|--|--|--|--|--|--|--|--|--|--|--|--|--|--|--|--|--|--|--|--|--|--|--|--|--|--|--|--|--|--|--|--|--|--|--|--|--|--|--|--|--|--|--|--|--|--|--|--|--|--|--|--|--|--|--|--|--|--|--|--|--|--|--|--|--|--|--|--|--|--|--|--|--|--|--|--|--|--|--|--|--|--|--|--|--|--|--|--|--|--|--|--|--|--|--|--|--|--|--|--|--|--|--|--|--|--|--|--|--|--|--|--|--|--|--|--|--|--|--|--|--|--|--|--|--|--|--|--|--|--|--|--|--|--|--|--|--|--|--|--|--|--|--|--|--|--|--|--|--|--|--|--|--|--|--|--|--|--|--|--|--|--|--|--|--|--|--|--|--|--|--|--|--|--|--|--|--|--|--|--|--|--|--|--|--|--|--|--|--|--|--|--|--|--|--|--|--|--|--|--|--|--|--|--|--|--|--|--|--|--|--|--|--|--|--|--|--|--|--|--|--|--|--|--|--|--|--|--|--|--|--|--|--|--|--|--|--|--|--|--|--|--|--|--|--|--|--|--|--|--|--|--|--|--|--|--|--|--|--|--|--|--|--|--|--|--|--|--|--|--|--|--|--|--|--|--|--|--|--|--|--|--|--|--|--|--|--|--|--|--|--|--|--|--|--|--|--|--|--|--|--|--|--|--|--|--|--|--|--|--|--|--|--|--|--|--|--|--|--|--|--|--|--|--|--|--|--|--|--|--|--|--|--|--|--|--|--|--|--|--|--|--|--|--|--|--|--|--|--|--|--|--|--|--|--|--|--|--|--|--|--|--|--|--|--|--|--|--|--|--|--|--|--|--|--|--|--|--|--|--|--|--|--|--|--|--|--|--|--|--|--|--|--|--|--|--|--|--|--|--|--|--|--|--|--|--|--|--|--|--|--|--|--|--|--|--|--|--|--|--|--|--|--|--|--|--|--|--|--|--|--|--|--|--|--|--|--|--|--|--|--|--|--|--|--|--|--|--|--|--|--|--|--|--|--|--|--|--|--|--|--|--|--|--|--|--|--|--|--|--|--|--|--|--|--|--|--|--|--|--|--|--|--|--|--|--|--|--|--|--|--|--|--|--|--|--|--|--|--|--|--|--|--|--|--|--|--|--|--|--|--|--|--|--|--|--|--|--|--|--|--|--|--|--|--|--|--|--|--|--|--|--|--|--|--|--|--|--|--|--|--|--|--|--|--|--|--|--|--|--|--|--|--|--|--|--|--|--|--|--|--|--|--|--|--|--|--|--|--|--|--|--|--|--|--|--|--|--|--|--|--|--|--|--|--|--|--|--|--|--|--|--|--|--|--|--|--|--|--|--|--|--|--|--|--|--|--|--|--|--|--|--|--|--|--|--|--|--|--|--|--|--|--|--|--|--|--|--|--|--|--|--|--|--|--|--|--|--|--|--|--|--|--|--|--|--|--|--|--|--|--|--|--|--|--|--|--|--|--|--|--|--|--|--|--|--|--|--|--|--|--|--|--|--|--|--|--|--|--|--|--|--|--|--|--|--|--|--|--|--|--|--|--|--|--|--|--|--|--|--|--|--|--|--|--|--|--|--|--|--|--|--|--|--|--|--|--|--|--|--|--|--|--|--|--|--|--|--|--|--|--|--|--|--|--|--|--|--|--|--|--|--|--|--|--|--|--|--|--|--|--|--|--|--|--|--|--|--|--|--|--|--|--|--|--|--|--|--|--|--|--|--|--|--|--|--|--|--|--|--|--|--|--|--|--|--|--|--|--|--|--|--|--|--|--|--|--|--|--|--|--|--|--|--|--|--|--|--|--|--|--|--|--|--|--|--|--|--|--|--|--|--|--|--|--|--|--|--|--|--|--|--|--|--|--|--|--|--|--|--|--|--|--|--|--|--|--|--|--|--|--|--|--|--|--|--|--|--|--|--|--|--|--|--|--|--|--|--|--|--|--|--|--|--|--|--|--|--|--|--|--|--|--|--|--|--|--|--|--|--|--|--|--|--|--|--|--|--|--|--|--|--|--|--|--|--|--|--|--|--|--|--|--|--|--|--|--|--|--|--|--|--|--|--|--|--|--|--|--|--|--|--|--|--|--|--|--|--|--|--|--|--|--|--|--|--|--|--|--|--|--|--|--|--|--|--|--|--|--|--|--|--|--|--|--|--|--|--|--|--|--|--|--|--|--|--|--|--|--|--|--|--|--|--|--|--|--|--|--|--|--|--|--|--|--|--|--|--|--|--|--|--|--|--|--|--|--|--|--|--|--|--|--|--|--|--|--|--|--|--|--|--|--|--|--|--|--|--|--|--|--|--|--|--|--|--|--|--|--|--|--|--|--|--|--|--|--|--|--|--|--|--|--|--|--|--|--|--|--|--|--|--|--|--|--|--|--|--|--|--|--|--|--|--|--|--|--|--|--|--|--|--|--|--|--|--|--|--|--|--|--|--|--|--|--|--|--|--|--|--|--|--|--|--|--|--|--|--|--|--|--|--|----|
|  |  | Vnezia Giulia) n. 827 del 4 gennio 2022 (chiusura Basilicata) - n. 828 del 4 gennaio 2022 (chiusura Puglia) - n. 829 del 4 gennaio 2022 (chiusura Piemonte) - n. 830 del 4 gennaio 2022 (chiusura Campania) - n. 831 del 4 gennaio 2022 (chiusura Liguria) - n. 839 del 12 gennaio 2022 - n. 855 del 01 febbraio 2022 (chiusura Abruzzo) - n. 860 del 3 febbraio 2022 (chiusura Toscana) - n. 878 del 25 marzo 2022 (chiusura Marche) n. 615 del 16 novembre 2019 - n. 622 del 17 dicembre 2019 - n. 674 del 15 maggio 2020 - 687 del 28 luglio 2020 - n. 731 del 31 dicembre 2020 - n. 753 del 19 marzo 2021 - n. 807 del 9 novembre 2021 - n. 809 del 25 novembre 2021 - n. 814 del 9 dicembre 2021 - n. 819 del 4 gennaio 2022 (chiusura Veneto) - n. 820 del 4 gennaio 2022 (chiusura Calabria) - n. 821 del 4 gennaio 2022 (chiusura Marche) - n. 822 del 4 |  |  |  |  |  |  |  |  |  |  |  |  |  |  |  |  |  |  |  |  |  |  |  |  |  |  |  |  |  |  |  |  |  |  |  |  |  |  |  |  |  |  |  |  |  |  |  |  |  |  |  |  |  |  |  |  |  |  |  |  |  |  |  |  |  |  |  |  |  |  |  |  |  |  |  |  |  |  |  |  |  |  |  |  |  |  |  |  |  |  |  |  |  |  |  |  |  |  |  |  |  |  |  |  |  |  |  |  |  |  |  |  |  |  |  |  |  |  |  |  |  |  |  |  |  |  |  |  |  |  |  |  |  |  |  |  |  |  |  |  |  |  |  |  |  |  |  |  |  |  |  |  |  |  |  |  |  |  |  |  |  |  |  |  |  |  |  |  |  |  |  |  |  |  |  |  |  |  |  |  |  |  |  |  |  |  |  |  |  |  |  |  |  |  |  |  |  |  |  |  |  |  |  |  |  |  |  |  |  |  |  |  |  |  |  |  |  |  |  |  |  |  |  |  |  |  |  |  |  |  |  |  |  |  |  |  |  |  |  |  |  |  |  |  |  |  |  |  |  |  |  |  |  |  |  |  |  |  |  |  |  |  |  |  |  |  |  |  |  |  |  |  |  |  |  |  |  |  |  |  |  |  |  |  |  |  |  |  |  |  |  |  |  |  |  |  |  |  |  |  |  |  |  |  |  |  |  |  |  |  |  |  |  |  |  |  |  |  |  |  |  |  |  |  |  |  |  |  |  |  |  |  |  |  |  |  |  |  |  |  |  |  |  |  |  |  |  |  |  |  |  |  |  |  |  |  |  |  |  |  |  |  |  |  |  |  |  |  |  |  |  |  |  |  |  |  |  |  |  |  |  |  |  |  |  |  |  |  |  |  |  |  |  |  |  |  |  |  |  |  |  |  |  |  |  |  |  |  |  |  |  |  |  |  |  |  |  |  |  |  |  |  |  |  |  |  |  |  |  |  |  |  |  |  |  |  |  |  |  |  |  |  |  |  |  |  |  |  |  |  |  |  |  |  |  |  |  |  |  |  |  |  |  |  |  |  |  |  |  |  |  |  |  |  |  |  |  |  |  |  |  |  |  |  |  |  |  |  |  |  |  |  |  |  |  |  |  |  |  |  |  |  |  |  |  |  |  |  |  |  |  |  |  |  |  |  |  |  |  |  |  |  |  |  |  |  |  |  |  |  |  |  |  |  |  |  |  |  |  |  |  |  |  |  |  |  |  |  |  |  |  |  |  |  |  |  |  |  |  |  |  |  |  |  |  |  |  |  |  |  |  |  |  |  |  |  |  |  |  |  |  |  |  |  |  |  |  |  |  |  |  |  |  |  |  |  |  |  |  |  |  |  |  |  |  |  |  |  |  |  |  |  |  |  |  |  |  |  |  |  |  |  |  |  |  |  |  |  |  |  |  |  |  |  |  |  |  |  |  |  |  |  |  |  |  |  |  |  |  |  |  |  |  |  |  |  |  |  |  |  |  |  |  |  |  |  |  |  |  |  |  |  |  |  |  |  |  |  |  |  |  |  |  |  |  |  |  |  |  |  |  |  |  |  |  |  |  |  |  |  |  |  |  |  |  |  |  |  |  |  |  |  |  |  |  |  |  |  |  |  |  |  |  |  |  |  |  |  |  |  |  |  |  |  |  |  |  |  |  |  |  |  |  |  |  |  |  |  |  |  |  |  |  |  |  |  |  |  |  |  |  |  |  |  |  |  |  |  |  |  |  |  |  |  |  |  |  |  |  |  |  |  |  |  |  |  |  |  |  |  |  |  |  |  |  |  |  |  |  |  |  |  |  |  |  |  |  |  |  |  |  |  |  |  |  |  |  |  |  |  |  |  |  |  |  |  |  |  |  |  |  |  |  |  |  |  |  |  |  |  |  |  |  |  |  |  |  |  |  |  |  |  |  |  |  |  |  |  |  |  |  |  |  |  |  |  |  |  |  |  |  |  |  |  |  |  |  |  |  |  |  |  |  |  |  |  |  |  |  |  |  |  |  |  |  |  |  |  |  |  |  |  |  |  |  |  |  |  |  |  |  |  |  |  |  |  |  |  |  |  |  |  |  |  |  |  |  |  |  |  |  |  |  |  |  |  |  |  |  |  |  |  |  |  |  |  |  |  |  |  |  |  |  |  |  |  |  |  |  |  |  |  |  |  |  |  |  |  |  |  |  |  |  |  |  |  |  |  |  |  |  |  |  |  |  |  |  |  |  |  |  |  |  |  |  |  |  |  |  |  |  |  |  |  |  |  |  |  |  |  |  |  |  |  |  |  |  |  |  |  |  |  |  |  |  |  |  |  |  |  |  |  |  |  |  |  |  |  |  |  |  |  |  |  |  |  |  |  |  |  |  |  |  |  |  |  |  |  |  |  |  |  |  |  |  |  |  |  |  |  |  |  |  |  |  |  |  |  |  |  |  |  |  |  |  |  |  |  |  |  |  |  |  |  |  |  |  |  |  |  |  |  |  |  |  |  |  |  |  |  |  |  |  |  |  |  |  |  |  |  |  |  |  |  |  |  |  |  |  |  |  |  |  |  |  |  |  |  |  |  |  |  |  |  |  |  |  |  |  |  |  |  |  |  |  |  |  |  |  |  |  |  |  |  |  |  |  |  |  |  |  |  |  |  |  |  |  |  |  |  |  |  |  |  |  |  |  |  |  |  |  |  |  |  |  |  |  |  |  |  |  |  |  |  |  |  |  |  |  |  |  |  |  |  |  |  |  |  |  |  |  |  |  |  |  |  |  |  |  |  |  |  |  |  |  |  |  |  |  |  |  |  |  |  |  |  |  |  |  |  |  |  |  |  |  |  |  |  |  |  |  |  |  |  |  |  |  |  |  |  |  |  |  |  |  |  |  |  |  |  |  |  |  |  |  |  |  |  |  |  |  |  |  |  |  |  |  |  |  |  |  |  |  |  |  | </ |
|--|--|------------------------------------------------------------------------------------------------------------------------------------------------------------------------------------------------------------------------------------------------------------------------------------------------------------------------------------------------------------------------------------------------------------------------------------------------------------------------------------------------------------------------------------------------------------------------------------------------------------------------------------------------------------------------------------------------------------------------------------------------------------------------------------------------------------------------------------------------------------------|--|--|--|--|--|--|--|--|--|--|--|--|--|--|--|--|--|--|--|--|--|--|--|--|--|--|--|--|--|--|--|--|--|--|--|--|--|--|--|--|--|--|--|--|--|--|--|--|--|--|--|--|--|--|--|--|--|--|--|--|--|--|--|--|--|--|--|--|--|--|--|--|--|--|--|--|--|--|--|--|--|--|--|--|--|--|--|--|--|--|--|--|--|--|--|--|--|--|--|--|--|--|--|--|--|--|--|--|--|--|--|--|--|--|--|--|--|--|--|--|--|--|--|--|--|--|--|--|--|--|--|--|--|--|--|--|--|--|--|--|--|--|--|--|--|--|--|--|--|--|--|--|--|--|--|--|--|--|--|--|--|--|--|--|--|--|--|--|--|--|--|--|--|--|--|--|--|--|--|--|--|--|--|--|--|--|--|--|--|--|--|--|--|--|--|--|--|--|--|--|--|--|--|--|--|--|--|--|--|--|--|--|--|--|--|--|--|--|--|--|--|--|--|--|--|--|--|--|--|--|--|--|--|--|--|--|--|--|--|--|--|--|--|--|--|--|--|--|--|--|--|--|--|--|--|--|--|--|--|--|--|--|--|--|--|--|--|--|--|--|--|--|--|--|--|--|--|--|--|--|--|--|--|--|--|--|--|--|--|--|--|--|--|--|--|--|--|--|--|--|--|--|--|--|--|--|--|--|--|--|--|--|--|--|--|--|--|--|--|--|--|--|--|--|--|--|--|--|--|--|--|--|--|--|--|--|--|--|--|--|--|--|--|--|--|--|--|--|--|--|--|--|--|--|--|--|--|--|--|--|--|--|--|--|--|--|--|--|--|--|--|--|--|--|--|--|--|--|--|--|--|--|--|--|--|--|--|--|--|--|--|--|--|--|--|--|--|--|--|--|--|--|--|--|--|--|--|--|--|--|--|--|--|--|--|--|--|--|--|--|--|--|--|--|--|--|--|--|--|--|--|--|--|--|--|--|--|--|--|--|--|--|--|--|--|--|--|--|--|--|--|--|--|--|--|--|--|--|--|--|--|--|--|--|--|--|--|--|--|--|--|--|--|--|--|--|--|--|--|--|--|--|--|--|--|--|--|--|--|--|--|--|--|--|--|--|--|--|--|--|--|--|--|--|--|--|--|--|--|--|--|--|--|--|--|--|--|--|--|--|--|--|--|--|--|--|--|--|--|--|--|--|--|--|--|--|--|--|--|--|--|--|--|--|--|--|--|--|--|--|--|--|--|--|--|--|--|--|--|--|--|--|--|--|--|--|--|--|--|--|--|--|--|--|--|--|--|--|--|--|--|--|--|--|--|--|--|--|--|--|--|--|--|--|--|--|--|--|--|--|--|--|--|--|--|--|--|--|--|--|--|--|--|--|--|--|--|--|--|--|--|--|--|--|--|--|--|--|--|--|--|--|--|--|--|--|--|--|--|--|--|--|--|--|--|--|--|--|--|--|--|--|--|--|--|--|--|--|--|--|--|--|--|--|--|--|--|--|--|--|--|--|--|--|--|--|--|--|--|--|--|--|--|--|--|--|--|--|--|--|--|--|--|--|--|--|--|--|--|--|--|--|--|--|--|--|--|--|--|--|--|--|--|--|--|--|--|--|--|--|--|--|--|--|--|--|--|--|--|--|--|--|--|--|--|--|--|--|--|--|--|--|--|--|--|--|--|--|--|--|--|--|--|--|--|--|--|--|--|--|--|--|--|--|--|--|--|--|--|--|--|--|--|--|--|--|--|--|--|--|--|--|--|--|--|--|--|--|--|--|--|--|--|--|--|--|--|--|--|--|--|--|--|--|--|--|--|--|--|--|--|--|--|--|--|--|--|--|--|--|--|--|--|--|--|--|--|--|--|--|--|--|--|--|--|--|--|--|--|--|--|--|--|--|--|--|--|--|--|--|--|--|--|--|--|--|--|--|--|--|--|--|--|--|--|--|--|--|--|--|--|--|--|--|--|--|--|--|--|--|--|--|--|--|--|--|--|--|--|--|--|--|--|--|--|--|--|--|--|--|--|--|--|--|--|--|--|--|--|--|--|--|--|--|--|--|--|--|--|--|--|--|--|--|--|--|--|--|--|--|--|--|--|--|--|--|--|--|--|--|--|--|--|--|--|--|--|--|--|--|--|--|--|--|--|--|--|--|--|--|--|--|--|--|--|--|--|--|--|--|--|--|--|--|--|--|--|--|--|--|--|--|--|--|--|--|--|--|--|--|--|--|--|--|--|--|--|--|--|--|--|--|--|--|--|--|--|--|--|--|--|--|--|--|--|--|--|--|--|--|--|--|--|--|--|--|--|--|--|--|--|--|--|--|--|--|--|--|--|--|--|--|--|--|--|--|--|--|--|--|--|--|--|--|--|--|--|--|--|--|--|--|--|--|--|--|--|--|--|--|--|--|--|--|--|--|--|--|--|--|--|--|--|--|--|--|--|--|--|--|--|--|--|--|--|--|--|--|--|--|--|--|--|--|--|--|--|--|--|--|--|--|--|--|--|--|--|--|--|--|--|--|--|--|--|--|--|--|--|--|--|--|--|--|--|--|--|--|--|--|--|--|--|--|--|--|--|--|--|--|--|--|--|--|--|--|--|--|--|--|--|--|--|--|--|--|--|--|--|--|--|--|--|--|--|--|--|--|--|--|--|--|--|--|--|--|--|--|--|--|--|--|--|--|--|--|--|--|--|--|--|--|--|--|--|--|--|--|--|--|--|--|--|--|--|--|--|--|--|--|--|--|--|--|--|--|--|--|--|--|--|--|--|--|--|--|--|--|--|--|--|--|--|--|--|--|--|--|--|--|--|--|--|--|--|--|--|--|--|--|--|--|--|--|--|--|--|--|--|--|--|--|--|--|--|--|--|--|--|--|--|--|--|--|--|--|--|--|--|--|--|--|--|--|--|--|--|--|--|--|--|--|--|--|--|----|

|       |   |                                                                                                                                                                                                                                                                                                                                                                                                                                                                                                                                                                                                                                                                                                                                                                                                                                                                                                                                                       |           |            |   |            |            |                |                    |                     |
|-------|---|-------------------------------------------------------------------------------------------------------------------------------------------------------------------------------------------------------------------------------------------------------------------------------------------------------------------------------------------------------------------------------------------------------------------------------------------------------------------------------------------------------------------------------------------------------------------------------------------------------------------------------------------------------------------------------------------------------------------------------------------------------------------------------------------------------------------------------------------------------------------------------------------------------------------------------------------------------|-----------|------------|---|------------|------------|----------------|--------------------|---------------------|
| ITF32 | 1 | n. 615 del 16 novembre 2019 - n. 622 del 17 dicembre 2019 - n. 674 del 15 maggio 2020 - 687 del 28 luglio 2020 - n. 731 del 31 dicembre 2020 - n. 753 del 19 marzo 2021 - n. 807 del 9 novembre 2021 - n. 809 del 25 novembre 2021 - n. 814 del 9 dicembre 2021 - n. 819 del 4 gennaio 2022 (chiusura Veneto) - n. 820 del 4 gennaio 2022 (chiusura Calabria) - n. 821 del 4 gennaio 2022 (chiusura Marche) - n. 822 del 4 gennaio 2022 (chiusura Emilia-Romagna) - n. 826 del 4 gennaio 2022 (chiusura Friuli-Venezia Giulia) n. 827 del 4 gennio 2022 (chiusura Basilicata) - n. 828 del 4 gennaio 2022 (chiusura Puglia) - n. 829 del 4 gennaio 2022 (chiusura Piemonte) - n. 830 del 4 gennaio 2022 (chiusura Campania) - n. 831 del 4 gennaio 2022 (chiusura Liguria) - n. 839 del 12 gennaio 2022 - n. 855 del 01 febbraio 2022 (chiusura Abruzzo) - n. 860 del 3 febbraio 2022 (chiusura Toscana) - n. 878 del 25 marzo 2022 (chiusura Marche) | 11/3/2019 | 11/22/2019 | 2 | 11/14/2019 | 11/14/2021 | #####<br>##### | 4,565,532.1<br>0 € | 10,102,152.<br>67 € |
| ITF31 | 1 | n. 615 del 16 novembre 2019 - n. 622 del 17 dicembre 2019 - n. 674 del 15 maggio 2020 - 687 del 28 luglio 2020 - n. 731 del 31 dicembre 2020 - n. 753 del 19 marzo 2021 - n. 807 del 9 novembre 2021 - n. 809 del 25 novembre 2021 - n. 814 del 9 dicembre 2021 - n. 819 del 4 gennaio 2022 (chiusura Veneto) - n. 820 del 4 gennaio 2022 (chiusura Calabria) - n. 821 del 4 gennaio 2022 (chiusura Marche) - n. 822 del 4 gennaio 2022 (chiusura Emilia-Romagna) - n. 826 del 4 gennaio 2022 (chiusura Friuli-Venezia Giulia) n. 827 del 4 gennio 2022 (chiusura Basilicata) - n. 828 del 4 gennaio 2022 (chiusura Puglia) - n. 829 del 4 gennaio 2022 (chiusura Piemonte) - n. 830 del 4 gennaio 2022 (chiusura Campania) - n. 831 del 4 gennaio 2022 (chiusura Liguria) - n. 839 del 12 gennaio 2022 - n. 855 del 01 febbraio 2022 (chiusura Abruzzo) - n. 860 del 3 febbraio 2022 (chiusura Toscana) - n. 878 del 25 marzo 2022 (chiusura Marche) | 11/3/2019 | 11/22/2019 | 2 | 11/14/2019 | 11/14/2021 | #####<br>##### | 4,565,532.1<br>0 € | 10,102,152.<br>67 € |
| ITF33 | 1 | n. 615 del 16 novembre 2019 - n. 622 del 17 dicembre 2019 - n. 674 del 15 maggio 2020 - 687 del 28 luglio 2020 - n. 731 del 31 dicembre 2020 - n. 753 del 19 marzo 2021 - n. 807 del 9 novembre 2021 - n. 809 del 25 novembre 2021 - n. 814 del 9 dicembre 2021 - n. 819 del 4 gennaio 2022 (chiusura Veneto) - n. 820 del 4 gennaio 2022 (chiusura Calabria) - n. 821 del 4 gennaio 2022 (chiusura Marche) - n. 822 del 4                                                                                                                                                                                                                                                                                                                                                                                                                                                                                                                            | 11/3/2019 | 11/22/2019 | 2 | 11/14/2019 | 11/14/2021 | #####<br>##### | 4,565,532.1<br>0 € | 10,102,152.<br>67 € |

[illegible]

[illegible]

|       |   |                                                                                                                                                                                                                                                                                                                                                                                                                                                                                                                                                                                                                                                                                                                                                                                                                                                                                                                                                                                                                                                                                                                                                                                                                                                                                                                                                                                                                                                                                                                                                                                                                                                                                                                                                                                                                                                                                                                                                                                                                                                                                                                                                                                                                                                                                                                                                |            |            |            |            |   |            |            |       |             |             |
|-------|---|------------------------------------------------------------------------------------------------------------------------------------------------------------------------------------------------------------------------------------------------------------------------------------------------------------------------------------------------------------------------------------------------------------------------------------------------------------------------------------------------------------------------------------------------------------------------------------------------------------------------------------------------------------------------------------------------------------------------------------------------------------------------------------------------------------------------------------------------------------------------------------------------------------------------------------------------------------------------------------------------------------------------------------------------------------------------------------------------------------------------------------------------------------------------------------------------------------------------------------------------------------------------------------------------------------------------------------------------------------------------------------------------------------------------------------------------------------------------------------------------------------------------------------------------------------------------------------------------------------------------------------------------------------------------------------------------------------------------------------------------------------------------------------------------------------------------------------------------------------------------------------------------------------------------------------------------------------------------------------------------------------------------------------------------------------------------------------------------------------------------------------------------------------------------------------------------------------------------------------------------------------------------------------------------------------------------------------------------|------------|------------|------------|------------|---|------------|------------|-------|-------------|-------------|
|       |   | (chiusura Calabria) - n. 821 del 4 gennaio 2022 (chiusura Marche) - n. 822 del 4 gennaio 2022 (chiusura Emilia-Romagna) - n. 826 del 4 gennaio 2022 (chiusura Friuli-Vnezia Giulia) n. 827 del 4 gennio 2022 (chiusura Basilicata) - n. 828 del 4 gennaio 2022 (chiusura Puglia) - n. 829 del 4 gennaio 2022 (chiusura Piemonte) - n. 830 del 4 gennaio 2022 (chiusura Campania) - n. 831 del 4 gennaio 2022 (chiusura Liguria) - n. 839 del 12 gennaio 2022 - n. 855 del 01 febbraio 2022 (chiusura Abruzzo) - n. 860 del 3 febbraio 2022 (chiusura Toscana) - n. 878 del 25 marzo 2022 (chiusura Marche) n. 615 del 16 novembre 2019 - n. 622 del 17 dicembre 2019 - n. 674 del 15 maggio 2020 - 687 del 28 luglio 2020 - n. 731 del 31 dicembre 2020 - n. 753 del 19 marzo 2021 - n. 807 del 9 novembre 2021 - n. 809 del 25 novembre 2021 - n. 814 del 9 dicembre 2021 - n. 819 del 4 gennaio 2022 (chiusura Veneto) - n. 820 del 4 gennaio 2022 (chiusura Calabria) - n. 821 del 4 gennaio 2022 (chiusura Marche) - n. 822 del 4 gennaio 2022 (chiusura Emilia-Romagna) - n. 826 del 4 gennaio 2022 (chiusura Friuli-Vnezia Giulia) n. 827 del 4 gennio 2022 (chiusura Basilicata) - n. 828 del 4 gennaio 2022 (chiusura Puglia) - n. 829 del 4 gennaio 2022 (chiusura Piemonte) - n. 830 del 4 gennaio 2022 (chiusura Campania) - n. 831 del 4 gennaio 2022 (chiusura Liguria) - n. 839 del 12 gennaio 2022 - n. 855 del 01 febbraio 2022 (chiusura Abruzzo) - n. 860 del 3 febbraio 2022 (chiusura Toscana) - n. 878 del 25 marzo 2022 (chiusura Marche) n. 615 del 16 novembre 2019 - n. 622 del 17 dicembre 2019 - n. 674 del 15 maggio 2020 - 687 del 28 luglio 2020 - n. 731 del 31 dicembre 2020 - n. 753 del 19 marzo 2021 - n. 807 del 9 novembre 2021 - n. 809 del 25 novembre 2021 - n. 814 del 9 dicembre 2021 - n. 819 del 4 gennaio 2022 (chiusura Veneto) - n. 820 del 4 gennaio 2022 (chiusura Calabria) - n. 821 del 4 gennaio 2022 (chiusura Marche) - n. 822 del 4 gennaio 2022 (chiusura Emilia-Romagna) - n. 826 del 4 gennaio 2022 (chiusura Friuli-Vnezia Giulia) n. 827 del 4 gennio 2022 (chiusura Basilicata) - n. 828 del 4 gennaio 2022 (chiusura Puglia) - n. 829 del 4 gennaio 2022 (chiusura Piemonte) - n. 830 del 4 gennaio 2022 (chiusura Campania) - n. 831 del 4 gennaio 2022 (chiusura Liguria) - n. | 11/10/2019 | 11/11/2019 | 11/23/2019 | 11/25/2019 | 1 | 11/14/2019 | 11/14/2021 | ##### | 4,565,532.1 | 10,102,152. |
| ITF61 | 1 |                                                                                                                                                                                                                                                                                                                                                                                                                                                                                                                                                                                                                                                                                                                                                                                                                                                                                                                                                                                                                                                                                                                                                                                                                                                                                                                                                                                                                                                                                                                                                                                                                                                                                                                                                                                                                                                                                                                                                                                                                                                                                                                                                                                                                                                                                                                                                |            |            |            |            |   |            | #####      | 0 €   | 67 €        |             |
|       |   | (chiusura Calabria) - n. 821 del 4 gennaio 2022 (chiusura Marche) - n. 822 del 4 gennaio 2022 (chiusura Emilia-Romagna) - n. 826 del 4 gennaio 2022 (chiusura Friuli-Vnezia Giulia) n. 827 del 4 gennio 2022 (chiusura Basilicata) - n. 828 del 4 gennaio 2022 (chiusura Puglia) - n. 829 del 4 gennaio 2022 (chiusura Piemonte) - n. 830 del 4 gennaio 2022 (chiusura Campania) - n. 831 del 4 gennaio 2022 (chiusura Liguria) - n. 839 del 12 gennaio 2022 - n. 855 del 01 febbraio 2022 (chiusura Abruzzo) - n. 860 del 3 febbraio 2022 (chiusura Toscana) - n. 878 del 25 marzo 2022 (chiusura Marche) n. 615 del 16 novembre 2019 - n. 622 del 17 dicembre 2019 - n. 674 del 15 maggio 2020 - 687 del 28 luglio 2020 - n. 731 del 31 dicembre 2020 - n. 753 del 19 marzo 2021 - n. 807 del 9 novembre 2021 - n. 809 del 25 novembre 2021 - n. 814 del 9 dicembre 2021 - n. 819 del 4 gennaio 2022 (chiusura Veneto) - n. 820 del 4 gennaio 2022 (chiusura Calabria) - n. 821 del 4 gennaio 2022 (chiusura Marche) - n. 822 del 4 gennaio 2022 (chiusura Emilia-Romagna) - n. 826 del 4 gennaio 2022 (chiusura Friuli-Vnezia Giulia) n. 827 del 4 gennio 2022 (chiusura Basilicata) - n. 828 del 4 gennaio 2022 (chiusura Puglia) - n. 829 del 4 gennaio 2022 (chiusura Piemonte) - n. 830 del 4 gennaio 2022 (chiusura Campania) - n. 831 del 4 gennaio 2022 (chiusura Liguria) - n.                                                                                                                                                                                                                                                                                                                                                                                                                                                                                                                                                                                                                                                                                                                                                                                                                                                                                                                                                      | 11/10/2019 | 11/11/2019 | 11/23/2019 | 11/25/2019 | 1 | 11/14/2019 | 11/14/2021 | ##### | 4,565,532.1 | 10,102,152. |
| ITF62 | 1 |                                                                                                                                                                                                                                                                                                                                                                                                                                                                                                                                                                                                                                                                                                                                                                                                                                                                                                                                                                                                                                                                                                                                                                                                                                                                                                                                                                                                                                                                                                                                                                                                                                                                                                                                                                                                                                                                                                                                                                                                                                                                                                                                                                                                                                                                                                                                                |            |            |            |            |   |            | #####      | 0 €   | 67 €        |             |
|       |   | (chiusura Calabria) - n. 821 del 4 gennaio 2022 (chiusura Marche) - n. 822 del 4 gennaio 2022 (chiusura Emilia-Romagna) - n. 826 del 4 gennaio 2022 (chiusura Friuli-Vnezia Giulia) n. 827 del 4 gennio 2022 (chiusura Basilicata) - n. 828 del 4 gennaio 2022 (chiusura Puglia) - n. 829 del 4 gennaio 2022 (chiusura Piemonte) - n. 830 del 4 gennaio 2022 (chiusura Campania) - n. 831 del 4 gennaio 2022 (chiusura Liguria) - n.                                                                                                                                                                                                                                                                                                                                                                                                                                                                                                                                                                                                                                                                                                                                                                                                                                                                                                                                                                                                                                                                                                                                                                                                                                                                                                                                                                                                                                                                                                                                                                                                                                                                                                                                                                                                                                                                                                           | 11/10/2019 | 11/11/2019 | 11/23/2019 | 11/25/2019 | 1 | 11/14/2019 | 11/14/2021 | ##### | 4,565,532.1 | 10,102,152. |
|       |   |                                                                                                                                                                                                                                                                                                                                                                                                                                                                                                                                                                                                                                                                                                                                                                                                                                                                                                                                                                                                                                                                                                                                                                                                                                                                                                                                                                                                                                                                                                                                                                                                                                                                                                                                                                                                                                                                                                                                                                                                                                                                                                                                                                                                                                                                                                                                                |            |            |            |            |   |            | #####      | 0 €   | 67 €        |             |

[illegible]

[illegible]

|       |   |                                                                                                                                                                                                                                                                                                                                                                                                                                                                                                                                                                                                                                                                                                                                                                                                                                                                                                                                                                                                                                                                                                                                                                                                                                                                                                                                                                                                                                                                                                                                                                                                                                                                                                                                                                                                                                                                                                                                                                                                                                                                                                                                                                                                                                                                                                                                                |           |            |   |            |            |       |             |             |
|-------|---|------------------------------------------------------------------------------------------------------------------------------------------------------------------------------------------------------------------------------------------------------------------------------------------------------------------------------------------------------------------------------------------------------------------------------------------------------------------------------------------------------------------------------------------------------------------------------------------------------------------------------------------------------------------------------------------------------------------------------------------------------------------------------------------------------------------------------------------------------------------------------------------------------------------------------------------------------------------------------------------------------------------------------------------------------------------------------------------------------------------------------------------------------------------------------------------------------------------------------------------------------------------------------------------------------------------------------------------------------------------------------------------------------------------------------------------------------------------------------------------------------------------------------------------------------------------------------------------------------------------------------------------------------------------------------------------------------------------------------------------------------------------------------------------------------------------------------------------------------------------------------------------------------------------------------------------------------------------------------------------------------------------------------------------------------------------------------------------------------------------------------------------------------------------------------------------------------------------------------------------------------------------------------------------------------------------------------------------------|-----------|------------|---|------------|------------|-------|-------------|-------------|
| ITH54 | 1 | gennaio 2022 (chiusura Campania) - n. 831 del 4 gennaio 2022 (chiusura Liguria) - n. 839 del 12 gennaio 2022 - n. 855 del 01 febbraio 2022 (chiusura Abruzzo) - n. 860 del 3 febbraio 2022 (chiusura Toscana) - n. 878 del 25 marzo 2022 (chiusura Marche) n. 615 del 16 novembre 2019 - n. 622 del 17 dicembre 2019 - n. 674 del 15 maggio 2020 - 687 del 28 luglio 2020 - n. 731 del 31 dicembre 2020 - n. 753 del 19 marzo 2021 - n. 807 del 9 novembre 2021 - n. 809 del 25 novembre 2021 - n. 814 del 9 dicembre 2021 - n. 819 del 4 gennaio 2022 (chiusura Veneto) - n. 820 del 4 gennaio 2022 (chiusura Calabria) - n. 821 del 4 gennaio 2022 (chiusura Marche) - n. 822 del 4 gennaio 2022 (chiusura Emilia-Romagna) - n. 826 del 4 gennaio 2022 (chiusura Friuli-Vnezia Giulia) n. 827 del 4 gennio 2022 (chiusura Basilicata) - n. 828 del 4 gennaio 2022 (chiusura Puglia) - n. 829 del 4 gennaio 2022 (chiusura Piemonte) - n. 830 del 4 gennaio 2022 (chiusura Campania) - n. 831 del 4 gennaio 2022 (chiusura Liguria) - n. 839 del 12 gennaio 2022 - n. 855 del 01 febbraio 2022 (chiusura Abruzzo) - n. 860 del 3 febbraio 2022 (chiusura Toscana) - n. 878 del 25 marzo 2022 (chiusura Marche) n. 615 del 16 novembre 2019 - n. 622 del 17 dicembre 2019 - n. 674 del 15 maggio 2020 - 687 del 28 luglio 2020 - n. 731 del 31 dicembre 2020 - n. 753 del 19 marzo 2021 - n. 807 del 9 novembre 2021 - n. 809 del 25 novembre 2021 - n. 814 del 9 dicembre 2021 - n. 819 del 4 gennaio 2022 (chiusura Veneto) - n. 820 del 4 gennaio 2022 (chiusura Calabria) - n. 821 del 4 gennaio 2022 (chiusura Marche) - n. 822 del 4 gennaio 2022 (chiusura Emilia-Romagna) - n. 826 del 4 gennaio 2022 (chiusura Friuli-Vnezia Giulia) n. 827 del 4 gennio 2022 (chiusura Basilicata) - n. 828 del 4 gennaio 2022 (chiusura Puglia) - n. 829 del 4 gennaio 2022 (chiusura Piemonte) - n. 830 del 4 gennaio 2022 (chiusura Campania) - n. 831 del 4 gennaio 2022 (chiusura Liguria) - n. 839 del 12 gennaio 2022 - n. 855 del 01 febbraio 2022 (chiusura Abruzzo) - n. 860 del 3 febbraio 2022 (chiusura Toscana) - n. 878 del 25 marzo 2022 (chiusura Marche) n. 615 del 16 novembre 2019 - n. 622 del 17 dicembre 2019 - n. 674 del 15 maggio 2020 - 687 del 28 luglio 2020 - n. 731 del 31 dicembre 2020 - n. 753 del 19 marzo 2021 - | 11/2/2019 | 11/20/2019 | 1 | 11/14/2019 | 11/14/2021 | ##### | 4,565,532.1 | 10,102,152. |
|       |   |                                                                                                                                                                                                                                                                                                                                                                                                                                                                                                                                                                                                                                                                                                                                                                                                                                                                                                                                                                                                                                                                                                                                                                                                                                                                                                                                                                                                                                                                                                                                                                                                                                                                                                                                                                                                                                                                                                                                                                                                                                                                                                                                                                                                                                                                                                                                                |           |            |   |            |            | ##### | 0 €         | 67 €        |
|       |   |                                                                                                                                                                                                                                                                                                                                                                                                                                                                                                                                                                                                                                                                                                                                                                                                                                                                                                                                                                                                                                                                                                                                                                                                                                                                                                                                                                                                                                                                                                                                                                                                                                                                                                                                                                                                                                                                                                                                                                                                                                                                                                                                                                                                                                                                                                                                                |           |            |   |            |            |       |             |             |
| ITH51 | 1 | gennaio 2022 (chiusura Campania) - n. 831 del 4 gennaio 2022 (chiusura Liguria) - n. 839 del 12 gennaio 2022 - n. 855 del 01 febbraio 2022 (chiusura Abruzzo) - n. 860 del 3 febbraio 2022 (chiusura Toscana) - n. 878 del 25 marzo 2022 (chiusura Marche) n. 615 del 16 novembre 2019 - n. 622 del 17 dicembre 2019 - n. 674 del 15 maggio 2020 - 687 del 28 luglio 2020 - n. 731 del 31 dicembre 2020 - n. 753 del 19 marzo 2021 - n. 807 del 9 novembre 2021 - n. 809 del 25 novembre 2021 - n. 814 del 9 dicembre 2021 - n. 819 del 4 gennaio 2022 (chiusura Veneto) - n. 820 del 4 gennaio 2022 (chiusura Calabria) - n. 821 del 4 gennaio 2022 (chiusura Marche) - n. 822 del 4 gennaio 2022 (chiusura Emilia-Romagna) - n. 826 del 4 gennaio 2022 (chiusura Friuli-Vnezia Giulia) n. 827 del 4 gennio 2022 (chiusura Basilicata) - n. 828 del 4 gennaio 2022 (chiusura Puglia) - n. 829 del 4 gennaio 2022 (chiusura Piemonte) - n. 830 del 4 gennaio 2022 (chiusura Campania) - n. 831 del 4 gennaio 2022 (chiusura Liguria) - n. 839 del 12 gennaio 2022 - n. 855 del 01 febbraio 2022 (chiusura Abruzzo) - n. 860 del 3 febbraio 2022 (chiusura Toscana) - n. 878 del 25 marzo 2022 (chiusura Marche) n. 615 del 16 novembre 2019 - n. 622 del 17 dicembre 2019 - n. 674 del 15 maggio 2020 - 687 del 28 luglio 2020 - n. 731 del 31 dicembre 2020 - n. 753 del 19 marzo 2021 -                                                                                                                                                                                                                                                                                                                                                                                                                                                                                                                                                                                                                                                                                                                                                                                                                                                                                                                                                      | 11/2/2019 | 11/20/2019 | 1 | 11/14/2019 | 11/14/2021 | ##### | 4,565,532.1 | 10,102,152. |
|       |   |                                                                                                                                                                                                                                                                                                                                                                                                                                                                                                                                                                                                                                                                                                                                                                                                                                                                                                                                                                                                                                                                                                                                                                                                                                                                                                                                                                                                                                                                                                                                                                                                                                                                                                                                                                                                                                                                                                                                                                                                                                                                                                                                                                                                                                                                                                                                                |           |            |   |            |            | ##### | 0 €         | 67 €        |
|       |   |                                                                                                                                                                                                                                                                                                                                                                                                                                                                                                                                                                                                                                                                                                                                                                                                                                                                                                                                                                                                                                                                                                                                                                                                                                                                                                                                                                                                                                                                                                                                                                                                                                                                                                                                                                                                                                                                                                                                                                                                                                                                                                                                                                                                                                                                                                                                                |           |            |   |            |            |       |             |             |
| ITH52 | 1 | gennaio 2022 (chiusura Campania) - n. 831 del 4 gennaio 2022 (chiusura Liguria) - n. 839 del 12 gennaio 2022 - n. 855 del 01 febbraio 2022 (chiusura Abruzzo) - n. 860 del 3 febbraio 2022 (chiusura Toscana) - n. 878 del 25 marzo 2022 (chiusura Marche) n. 615 del 16 novembre 2019 - n. 622 del 17 dicembre 2019 - n. 674 del 15 maggio 2020 - 687 del 28 luglio 2020 - n. 731 del 31 dicembre 2020 - n. 753 del 19 marzo 2021 -                                                                                                                                                                                                                                                                                                                                                                                                                                                                                                                                                                                                                                                                                                                                                                                                                                                                                                                                                                                                                                                                                                                                                                                                                                                                                                                                                                                                                                                                                                                                                                                                                                                                                                                                                                                                                                                                                                           | 11/2/2019 | 11/20/2019 | 1 | 11/14/2019 | 11/14/2021 | ##### | 4,565,532.1 | 10,102,152. |
|       |   |                                                                                                                                                                                                                                                                                                                                                                                                                                                                                                                                                                                                                                                                                                                                                                                                                                                                                                                                                                                                                                                                                                                                                                                                                                                                                                                                                                                                                                                                                                                                                                                                                                                                                                                                                                                                                                                                                                                                                                                                                                                                                                                                                                                                                                                                                                                                                |           |            |   |            |            | ##### | 0 €         | 67 €        |
|       |   |                                                                                                                                                                                                                                                                                                                                                                                                                                                                                                                                                                                                                                                                                                                                                                                                                                                                                                                                                                                                                                                                                                                                                                                                                                                                                                                                                                                                                                                                                                                                                                                                                                                                                                                                                                                                                                                                                                                                                                                                                                                                                                                                                                                                                                                                                                                                                |           |            |   |            |            |       |             |             |



[illegible]

[illegible]

67

|       |   |                                                                                                                                                                                                                                                                                                                                                                                                                                                                                                                                                                                                                                                                                                                                                                                                                                                                                                                                                                                                                                                                                                                                                                                                                                                                                                                                                                                                                                                                                                                                                                                                                                                                                                                                                                                                                                                                                                                                                                                                                                                                                                                                                                                                                                                                                                                                                 |           |            |   |            |            |       |             |             |
|-------|---|-------------------------------------------------------------------------------------------------------------------------------------------------------------------------------------------------------------------------------------------------------------------------------------------------------------------------------------------------------------------------------------------------------------------------------------------------------------------------------------------------------------------------------------------------------------------------------------------------------------------------------------------------------------------------------------------------------------------------------------------------------------------------------------------------------------------------------------------------------------------------------------------------------------------------------------------------------------------------------------------------------------------------------------------------------------------------------------------------------------------------------------------------------------------------------------------------------------------------------------------------------------------------------------------------------------------------------------------------------------------------------------------------------------------------------------------------------------------------------------------------------------------------------------------------------------------------------------------------------------------------------------------------------------------------------------------------------------------------------------------------------------------------------------------------------------------------------------------------------------------------------------------------------------------------------------------------------------------------------------------------------------------------------------------------------------------------------------------------------------------------------------------------------------------------------------------------------------------------------------------------------------------------------------------------------------------------------------------------|-----------|------------|---|------------|------------|-------|-------------|-------------|
|       |   | Vnezia Giulia) n. 827 del 4 gennio 2022 (chiusura Basilicata) - n. 828 del 4 gennaio 2022 (chiusura Puglia) - n. 829 del 4 gennaio 2022 (chiusura Piemonte) - n. 830 del 4 gennaio 2022 (chiusura Campania) - n. 831 del 4 gennaio 2022 (chiusura Liguria) - n. 839 del 12 gennaio 2022 - n. 855 del 01 febbraio 2022 (chiusura Abruzzo) - n. 860 del 3 febbraio 2022 (chiusura Toscana) - n. 878 del 25 marzo 2022 (chiusura Marche) n. 615 del 16 novembre 2019 - n. 622 del 17 dicembre 2019 - n. 674 del 15 maggio 2020 - 687 del 28 luglio 2020 - n. 731 del 31 dicembre 2020 - n. 753 del 19 marzo 2021 - n. 807 del 9 novembre 2021 - n. 809 del 25 novembre 2021 - n. 814 del 9 dicembre 2021 - n. 819 del 4 gennaio 2022 (chiusura Veneto) - n. 820 del 4 gennaio 2022 (chiusura Calabria) - n. 821 del 4 gennaio 2022 (chiusura Marche) - n. 822 del 4 gennaio 2022 (chiusura Emilia-Romagna) - n. 826 del 4 gennaio 2022 (chiusura Friuli-Vnezia Giulia) n. 827 del 4 gennio 2022 (chiusura Basilicata) - n. 828 del 4 gennaio 2022 (chiusura Puglia) - n. 829 del 4 gennaio 2022 (chiusura Piemonte) - n. 830 del 4 gennaio 2022 (chiusura Campania) - n. 831 del 4 gennaio 2022 (chiusura Liguria) - n. 839 del 12 gennaio 2022 - n. 855 del 01 febbraio 2022 (chiusura Abruzzo) - n. 860 del 3 febbraio 2022 (chiusura Toscana) - n. 878 del 25 marzo 2022 (chiusura Marche) n. 615 del 16 novembre 2019 - n. 622 del 17 dicembre 2019 - n. 674 del 15 maggio 2020 - 687 del 28 luglio 2020 - n. 731 del 31 dicembre 2020 - n. 753 del 19 marzo 2021 - n. 807 del 9 novembre 2021 - n. 809 del 25 novembre 2021 - n. 814 del 9 dicembre 2021 - n. 819 del 4 gennaio 2022 (chiusura Veneto) - n. 820 del 4 gennaio 2022 (chiusura Calabria) - n. 821 del 4 gennaio 2022 (chiusura Marche) - n. 822 del 4 gennaio 2022 (chiusura Emilia-Romagna) - n. 826 del 4 gennaio 2022 (chiusura Friuli-Vnezia Giulia) n. 827 del 4 gennio 2022 (chiusura Basilicata) - n. 828 del 4 gennaio 2022 (chiusura Puglia) - n. 829 del 4 gennaio 2022 (chiusura Piemonte) - n. 830 del 4 gennaio 2022 (chiusura Campania) - n. 831 del 4 gennaio 2022 (chiusura Liguria) - n. 839 del 12 gennaio 2022 - n. 855 del 01 febbraio 2022 (chiusura Abruzzo) - n. 860 del 3 febbraio 2022 (chiusura Toscana) - n. 878 del 25 marzo 2022 (chiusura Marche) | 11/1/2019 | 11/30/2019 | 3 | 11/14/2019 | 11/14/2021 | ##### | 4,565,532.1 | 10,102,152. |
| ITI32 | 1 |                                                                                                                                                                                                                                                                                                                                                                                                                                                                                                                                                                                                                                                                                                                                                                                                                                                                                                                                                                                                                                                                                                                                                                                                                                                                                                                                                                                                                                                                                                                                                                                                                                                                                                                                                                                                                                                                                                                                                                                                                                                                                                                                                                                                                                                                                                                                                 |           |            |   | #####      | 0 €        | 67 €  |             |             |
| ITI34 | 1 |                                                                                                                                                                                                                                                                                                                                                                                                                                                                                                                                                                                                                                                                                                                                                                                                                                                                                                                                                                                                                                                                                                                                                                                                                                                                                                                                                                                                                                                                                                                                                                                                                                                                                                                                                                                                                                                                                                                                                                                                                                                                                                                                                                                                                                                                                                                                                 |           |            |   | #####      | 0 €        | 67 €  |             |             |

|       |   |                                                                                                                                                                                                                                                                                                                                                                                                                                                                                                                                                                                                                                                                                                                                                                                                                                                                                                                                                      |           |            |   |            |            |                |                    |                     |
|-------|---|------------------------------------------------------------------------------------------------------------------------------------------------------------------------------------------------------------------------------------------------------------------------------------------------------------------------------------------------------------------------------------------------------------------------------------------------------------------------------------------------------------------------------------------------------------------------------------------------------------------------------------------------------------------------------------------------------------------------------------------------------------------------------------------------------------------------------------------------------------------------------------------------------------------------------------------------------|-----------|------------|---|------------|------------|----------------|--------------------|---------------------|
| ITI35 | 1 | n. 615 del 16 novembre 2019 - n. 622 del 17 dicembre 2019 - n. 674 del 15 maggio 2020 - 687 del 28 luglio 2020 - n. 731 del 31 dicembre 2020 - n. 753 del 19 marzo 2021 - n. 807 del 9 novembre 2021 - n. 809 del 25 novembre 2021 - n. 814 del 9 dicembre 2021 - n. 819 del 4 gennaio 2022 (chiusura Veneto) - n. 820 del 4 gennaio 2022 (chiusura Calabria) - n. 821 del 4 gennaio 2022 (chiusura Marche) - n. 822 del 4 gennaio 2022 (chiusura Emilia-Romagna) - n. 826 del 4 gennaio 2022 (chiusura Friuli-Vnezia Giulia) n. 827 del 4 gennio 2022 (chiusura Basilicata) - n. 828 del 4 gennaio 2022 (chiusura Puglia) - n. 829 del 4 gennaio 2022 (chiusura Piemonte) - n. 830 del 4 gennaio 2022 (chiusura Campania) - n. 831 del 4 gennaio 2022 (chiusura Liguria) - n. 839 del 12 gennaio 2022 - n. 855 del 01 febbraio 2022 (chiusura Abruzzo) - n. 860 del 3 febbraio 2022 (chiusura Toscana) - n. 878 del 25 marzo 2022 (chiusura Marche) | 11/1/2019 | 11/30/2019 | 3 | 11/14/2019 | 11/14/2021 | #####<br>##### | 4,565,532.1<br>0 € | 10,102,152.<br>67 € |
| ITI33 | 1 | n. 615 del 16 novembre 2019 - n. 622 del 17 dicembre 2019 - n. 674 del 15 maggio 2020 - 687 del 28 luglio 2020 - n. 731 del 31 dicembre 2020 - n. 753 del 19 marzo 2021 - n. 807 del 9 novembre 2021 - n. 809 del 25 novembre 2021 - n. 814 del 9 dicembre 2021 - n. 819 del 4 gennaio 2022 (chiusura Veneto) - n. 820 del 4 gennaio 2022 (chiusura Calabria) - n. 821 del 4 gennaio 2022 (chiusura Marche) - n. 822 del 4 gennaio 2022 (chiusura Emilia-Romagna) - n. 826 del 4 gennaio 2022 (chiusura Friuli-Vnezia Giulia) n. 827 del 4 gennio 2022 (chiusura Basilicata) - n. 828 del 4 gennaio 2022 (chiusura Puglia) - n. 829 del 4 gennaio 2022 (chiusura Piemonte) - n. 830 del 4 gennaio 2022 (chiusura Campania) - n. 831 del 4 gennaio 2022 (chiusura Liguria) - n. 839 del 12 gennaio 2022 - n. 855 del 01 febbraio 2022 (chiusura Abruzzo) - n. 860 del 3 febbraio 2022 (chiusura Toscana) - n. 878 del 25 marzo 2022 (chiusura Marche) | 11/1/2019 | 11/30/2019 | 3 | 11/14/2019 | 11/14/2021 | #####<br>##### | 4,565,532.1<br>0 € | 10,102,152.<br>67 € |
| ITI31 | 1 | n. 615 del 16 novembre 2019 - n. 622 del 17 dicembre 2019 - n. 674 del 15 maggio 2020 - 687 del 28 luglio 2020 - n. 731 del 31 dicembre 2020 - n. 753 del 19 marzo 2021 - n. 807 del 9 novembre 2021 - n. 809 del 25 novembre 2021 - n. 814 del 9 dicembre 2021 - n. 819 del 4 gennaio 2022 (chiusura Veneto) - n. 820 del 4 gennaio 2022 (chiusura Calabria) - n. 821 del 4 gennaio 2022 (chiusura Marche) - n. 822 del 4                                                                                                                                                                                                                                                                                                                                                                                                                                                                                                                           | 11/1/2019 | 11/30/2019 | 3 | 11/14/2019 | 11/14/2021 | #####<br>##### | 4,565,532.1<br>0 € | 10,102,152.<br>67 € |

[illegible]

|       |   |                                                                                                                                                                                                                                                                                                                                                                                                                                                                                                                                                                                                                                                                                                                                                                                                                                                                                                                                                                                                                                                                                                                                                                                                                                                                                                                                                                                                                                                                                                                                                                                                                                                                                                                                                                                                                                                                                                                                                                                                                                                                                                                                                                                                                                                                                                                                                      |           |            |   |            |            |                |                    |                     |
|-------|---|------------------------------------------------------------------------------------------------------------------------------------------------------------------------------------------------------------------------------------------------------------------------------------------------------------------------------------------------------------------------------------------------------------------------------------------------------------------------------------------------------------------------------------------------------------------------------------------------------------------------------------------------------------------------------------------------------------------------------------------------------------------------------------------------------------------------------------------------------------------------------------------------------------------------------------------------------------------------------------------------------------------------------------------------------------------------------------------------------------------------------------------------------------------------------------------------------------------------------------------------------------------------------------------------------------------------------------------------------------------------------------------------------------------------------------------------------------------------------------------------------------------------------------------------------------------------------------------------------------------------------------------------------------------------------------------------------------------------------------------------------------------------------------------------------------------------------------------------------------------------------------------------------------------------------------------------------------------------------------------------------------------------------------------------------------------------------------------------------------------------------------------------------------------------------------------------------------------------------------------------------------------------------------------------------------------------------------------------------|-----------|------------|---|------------|------------|----------------|--------------------|---------------------|
| ITF44 | 1 | del 3 febbraio 2022 (chiusura Toscana) - n. 878 del 25 marzo 2022 (chiusura Marche)<br>n. 615 del 16 novembre 2019 - n. 622 del 17 dicembre 2019 - n. 674 del 15 maggio 2020 - 687 del 28 luglio 2020 - n. 731 del 31 dicembre 2020 - n. 753 del 19 marzo 2021 - n. 807 del 9 novembre 2021 - n. 809 del 25 novembre 2021 - n. 814 del 9 dicembre 2021 - n. 819 del 4 gennaio 2022 (chiusura Veneto) - n. 820 del 4 gennaio 2022 (chiusura Calabria) - n. 821 del 4 gennaio 2022 (chiusura Marche) - n. 822 del 4 gennaio 2022 (chiusura Emilia-Romagna) - n. 826 del 4 gennaio 2022 (chiusura Friuli-Venezia Giulia) n. 827 del 4 gennaio 2022 (chiusura Basilicata) - n. 828 del 4 gennaio 2022 (chiusura Puglia) - n. 829 del 4 gennaio 2022 (chiusura Piemonte) - n. 830 del 4 gennaio 2022 (chiusura Campania) - n. 831 del 4 gennaio 2022 (chiusura Liguria) - n. 839 del 12 gennaio 2022 - n. 855 del 01 febbraio 2022 (chiusura Abruzzo) - n. 860 del 3 febbraio 2022 (chiusura Toscana) - n. 878 del 25 marzo 2022 (chiusura Marche)<br>n. 615 del 16 novembre 2019 - n. 622 del 17 dicembre 2019 - n. 674 del 15 maggio 2020 - 687 del 28 luglio 2020 - n. 731 del 31 dicembre 2020 - n. 753 del 19 marzo 2021 - n. 807 del 9 novembre 2021 - n. 809 del 25 novembre 2021 - n. 814 del 9 dicembre 2021 - n. 819 del 4 gennaio 2022 (chiusura Veneto) - n. 820 del 4 gennaio 2022 (chiusura Calabria) - n. 821 del 4 gennaio 2022 (chiusura Marche) - n. 822 del 4 gennaio 2022 (chiusura Emilia-Romagna) - n. 826 del 4 gennaio 2022 (chiusura Friuli-Venezia Giulia) n. 827 del 4 gennaio 2022 (chiusura Basilicata) - n. 828 del 4 gennaio 2022 (chiusura Puglia) - n. 829 del 4 gennaio 2022 (chiusura Piemonte) - n. 830 del 4 gennaio 2022 (chiusura Campania) - n. 831 del 4 gennaio 2022 (chiusura Liguria) - n. 839 del 12 gennaio 2022 - n. 855 del 01 febbraio 2022 (chiusura Abruzzo) - n. 860 del 3 febbraio 2022 (chiusura Toscana) - n. 878 del 25 marzo 2022 (chiusura Marche)<br>n. 615 del 16 novembre 2019 - n. 622 del 17 dicembre 2019 - n. 674 del 15 maggio 2020 - 687 del 28 luglio 2020 - n. 731 del 31 dicembre 2020 - n. 753 del 19 marzo 2021 - n. 807 del 9 novembre 2021 - n. 809 del 25 novembre 2021 - n. 814 del 9 dicembre 2021 - n. 819 del 4 gennaio 2022 (chiusura Veneto) - n. 820 del 4 gennaio 2022 | 11/1/2019 | 11/30/2019 | 3 | 11/14/2019 | 11/14/2021 | #####<br>##### | 4,565,532.1<br>0 € | 10,102,152.<br>67 € |
| ITF46 | 1 | del 3 febbraio 2022 (chiusura Toscana) - n. 878 del 25 marzo 2022 (chiusura Marche)<br>n. 615 del 16 novembre 2019 - n. 622 del 17 dicembre 2019 - n. 674 del 15 maggio 2020 - 687 del 28 luglio 2020 - n. 731 del 31 dicembre 2020 - n. 753 del 19 marzo 2021 - n. 807 del 9 novembre 2021 - n. 809 del 25 novembre 2021 - n. 814 del 9 dicembre 2021 - n. 819 del 4 gennaio 2022 (chiusura Veneto) - n. 820 del 4 gennaio 2022 (chiusura Calabria) - n. 821 del 4 gennaio 2022 (chiusura Marche) - n. 822 del 4 gennaio 2022 (chiusura Emilia-Romagna) - n. 826 del 4 gennaio 2022 (chiusura Friuli-Venezia Giulia) n. 827 del 4 gennaio 2022 (chiusura Basilicata) - n. 828 del 4 gennaio 2022 (chiusura Puglia) - n. 829 del 4 gennaio 2022 (chiusura Piemonte) - n. 830 del 4 gennaio 2022 (chiusura Campania) - n. 831 del 4 gennaio 2022 (chiusura Liguria) - n. 839 del 12 gennaio 2022 - n. 855 del 01 febbraio 2022 (chiusura Abruzzo) - n. 860 del 3 febbraio 2022 (chiusura Toscana) - n. 878 del 25 marzo 2022 (chiusura Marche)<br>n. 615 del 16 novembre 2019 - n. 622 del 17 dicembre 2019 - n. 674 del 15 maggio 2020 - 687 del 28 luglio 2020 - n. 731 del 31 dicembre 2020 - n. 753 del 19 marzo 2021 - n. 807 del 9 novembre 2021 - n. 809 del 25 novembre 2021 - n. 814 del 9 dicembre 2021 - n. 819 del 4 gennaio 2022 (chiusura Veneto) - n. 820 del 4 gennaio 2022                                                                                                                                                                                                                                                                                                                                                                                                                                                                                                                                                                                                                                                                                                                                                                                                                                                                                                                                                           | 11/1/2019 | 11/30/2019 | 3 | 11/14/2019 | 11/14/2021 | #####<br>##### | 4,565,532.1<br>0 € | 10,102,152.<br>67 € |
| ITF45 | 1 | del 3 febbraio 2022 (chiusura Toscana) - n. 878 del 25 marzo 2022 (chiusura Marche)<br>n. 615 del 16 novembre 2019 - n. 622 del 17 dicembre 2019 - n. 674 del 15 maggio 2020 - 687 del 28 luglio 2020 - n. 731 del 31 dicembre 2020 - n. 753 del 19 marzo 2021 - n. 807 del 9 novembre 2021 - n. 809 del 25 novembre 2021 - n. 814 del 9 dicembre 2021 - n. 819 del 4 gennaio 2022 (chiusura Veneto) - n. 820 del 4 gennaio 2022                                                                                                                                                                                                                                                                                                                                                                                                                                                                                                                                                                                                                                                                                                                                                                                                                                                                                                                                                                                                                                                                                                                                                                                                                                                                                                                                                                                                                                                                                                                                                                                                                                                                                                                                                                                                                                                                                                                     | 11/1/2019 | 11/30/2019 | 3 | 11/14/2019 | 11/14/2021 | #####<br>##### | 4,565,532.1<br>0 € | 10,102,152.<br>67 € |

|       |   |                                                                                                                                                                                                                                                                                                                                                                                                                                                                                                                                                                                                                                                                                                                                                                                                                                                                                                                                                                                                                                                                                                                                                                                                                                                                                                                                                                                                                                                                                                                                                                                                                                                                                                                                                                                                                                                                                                                                                                                                                                                                                                                                                                                                                                                                                                                                                             |            |            |   |            |            |       |             |             |
|-------|---|-------------------------------------------------------------------------------------------------------------------------------------------------------------------------------------------------------------------------------------------------------------------------------------------------------------------------------------------------------------------------------------------------------------------------------------------------------------------------------------------------------------------------------------------------------------------------------------------------------------------------------------------------------------------------------------------------------------------------------------------------------------------------------------------------------------------------------------------------------------------------------------------------------------------------------------------------------------------------------------------------------------------------------------------------------------------------------------------------------------------------------------------------------------------------------------------------------------------------------------------------------------------------------------------------------------------------------------------------------------------------------------------------------------------------------------------------------------------------------------------------------------------------------------------------------------------------------------------------------------------------------------------------------------------------------------------------------------------------------------------------------------------------------------------------------------------------------------------------------------------------------------------------------------------------------------------------------------------------------------------------------------------------------------------------------------------------------------------------------------------------------------------------------------------------------------------------------------------------------------------------------------------------------------------------------------------------------------------------------------|------------|------------|---|------------|------------|-------|-------------|-------------|
| ITF43 | 1 | <p>(chiusura Calabria) - n. 821 del 4 gennaio 2022 (chiusura Marche) - n. 822 del 4 gennaio 2022 (chiusura Emilia-Romagna) - n. 826 del 4 gennaio 2022 (chiusura Friuli-Venezia Giulia) n. 827 del 4 gennaio 2022 (chiusura Basilicata) - n. 828 del 4 gennaio 2022 (chiusura Puglia) - n. 829 del 4 gennaio 2022 (chiusura Piemonte) - n. 830 del 4 gennaio 2022 (chiusura Campania) - n. 831 del 4 gennaio 2022 (chiusura Liguria) - n. 839 del 12 gennaio 2022 - n. 855 del 01 febbraio 2022 (chiusura Abruzzo) - n. 860 del 3 febbraio 2022 (chiusura Toscana) - n. 878 del 25 marzo 2022 (chiusura Marche) n. 615 del 16 novembre 2019 - n. 622 del 17 dicembre 2019 - n. 674 del 15 maggio 2020 - 687 del 28 luglio 2020 - n. 731 del 31 dicembre 2020 - n. 753 del 19 marzo 2021 - n. 807 del 9 novembre 2021 - n. 809 del 25 novembre 2021 - n. 814 del 9 dicembre 2021 - n. 819 del 4 gennaio 2022 (chiusura Veneto) - n. 820 del 4 gennaio 2022 (chiusura Calabria) - n. 821 del 4 gennaio 2022 (chiusura Marche) - n. 822 del 4 gennaio 2022 (chiusura Emilia-Romagna) - n. 826 del 4 gennaio 2022 (chiusura Friuli-Venezia Giulia) n. 827 del 4 gennaio 2022 (chiusura Basilicata) - n. 828 del 4 gennaio 2022 (chiusura Puglia) - n. 829 del 4 gennaio 2022 (chiusura Piemonte) - n. 830 del 4 gennaio 2022 (chiusura Campania) - n. 831 del 4 gennaio 2022 (chiusura Liguria) - n. 839 del 12 gennaio 2022 - n. 855 del 01 febbraio 2022 (chiusura Abruzzo) - n. 860 del 3 febbraio 2022 (chiusura Toscana) - n. 878 del 25 marzo 2022 (chiusura Marche) n. 615 del 16 novembre 2019 - n. 622 del 17 dicembre 2019 - n. 674 del 15 maggio 2020 - 687 del 28 luglio 2020 - n. 731 del 31 dicembre 2020 - n. 753 del 19 marzo 2021 - n. 807 del 9 novembre 2021 - n. 809 del 25 novembre 2021 - n. 814 del 9 dicembre 2021 - n. 819 del 4 gennaio 2022 (chiusura Veneto) - n. 820 del 4 gennaio 2022 (chiusura Calabria) - n. 821 del 4 gennaio 2022 (chiusura Marche) - n. 822 del 4 gennaio 2022 (chiusura Emilia-Romagna) - n. 826 del 4 gennaio 2022 (chiusura Friuli-Venezia Giulia) n. 827 del 4 gennaio 2022 (chiusura Basilicata) - n. 828 del 4 gennaio 2022 (chiusura Puglia) - n. 829 del 4 gennaio 2022 (chiusura Piemonte) - n. 830 del 4 gennaio 2022 (chiusura Campania) - n. 831 del 4 gennaio 2022 (chiusura Liguria) - n.</p> | 11/1/2019  | 11/30/2019 | 3 | 11/14/2019 | 11/14/2021 | ##### | 4,565,532.1 | 10,102,152. |
|       |   |                                                                                                                                                                                                                                                                                                                                                                                                                                                                                                                                                                                                                                                                                                                                                                                                                                                                                                                                                                                                                                                                                                                                                                                                                                                                                                                                                                                                                                                                                                                                                                                                                                                                                                                                                                                                                                                                                                                                                                                                                                                                                                                                                                                                                                                                                                                                                             |            |            |   |            |            | ##### | 0 €         | 67 €        |
| ITI18 | 1 | <p>(chiusura Calabria) - n. 821 del 4 gennaio 2022 (chiusura Marche) - n. 822 del 4 gennaio 2022 (chiusura Emilia-Romagna) - n. 826 del 4 gennaio 2022 (chiusura Friuli-Venezia Giulia) n. 827 del 4 gennaio 2022 (chiusura Basilicata) - n. 828 del 4 gennaio 2022 (chiusura Puglia) - n. 829 del 4 gennaio 2022 (chiusura Piemonte) - n. 830 del 4 gennaio 2022 (chiusura Campania) - n. 831 del 4 gennaio 2022 (chiusura Liguria) - n.</p>                                                                                                                                                                                                                                                                                                                                                                                                                                                                                                                                                                                                                                                                                                                                                                                                                                                                                                                                                                                                                                                                                                                                                                                                                                                                                                                                                                                                                                                                                                                                                                                                                                                                                                                                                                                                                                                                                                               | 11/16/2019 | 11/17/2019 | 1 | 11/14/2019 | 11/14/2021 | ##### | 4,565,532.1 | 10,102,152. |
|       |   |                                                                                                                                                                                                                                                                                                                                                                                                                                                                                                                                                                                                                                                                                                                                                                                                                                                                                                                                                                                                                                                                                                                                                                                                                                                                                                                                                                                                                                                                                                                                                                                                                                                                                                                                                                                                                                                                                                                                                                                                                                                                                                                                                                                                                                                                                                                                                             |            |            |   |            |            | ##### | 0 €         | 67 €        |



[illegible]

|       |   |                                                                                                                                                                                                                                                                                                                                                                                                                                                                                                                                                                                                                                                                                                                                                                                                                                                                                                                                                                                                                                                                                                                                                                                                                                                                                                                                                                                                                                                                                                                                                                                                                                                                                                                                                                                                                                                                                                                                                                                                                                                                                                                                                                                                                                                                                                                                                       |            |            |   |            |            |       |             |             |
|-------|---|-------------------------------------------------------------------------------------------------------------------------------------------------------------------------------------------------------------------------------------------------------------------------------------------------------------------------------------------------------------------------------------------------------------------------------------------------------------------------------------------------------------------------------------------------------------------------------------------------------------------------------------------------------------------------------------------------------------------------------------------------------------------------------------------------------------------------------------------------------------------------------------------------------------------------------------------------------------------------------------------------------------------------------------------------------------------------------------------------------------------------------------------------------------------------------------------------------------------------------------------------------------------------------------------------------------------------------------------------------------------------------------------------------------------------------------------------------------------------------------------------------------------------------------------------------------------------------------------------------------------------------------------------------------------------------------------------------------------------------------------------------------------------------------------------------------------------------------------------------------------------------------------------------------------------------------------------------------------------------------------------------------------------------------------------------------------------------------------------------------------------------------------------------------------------------------------------------------------------------------------------------------------------------------------------------------------------------------------------------|------------|------------|---|------------|------------|-------|-------------|-------------|
| ITI12 | 1 | <p>2021 - n. 819 del 4 gennaio 2022 (chiusura Veneto) - n. 820 del 4 gennaio 2022 (chiusura Calabria) - n. 821 del 4 gennaio 2022 (chiusura Marche) - n. 822 del 4 gennaio 2022 (chiusura Emilia-Romagna) - n. 826 del 4 gennaio 2022 (chiusura Friuli-Venezia Giulia) n. 827 del 4 gennaio 2022 (chiusura Basilicata) - n. 828 del 4 gennaio 2022 (chiusura Puglia) - n. 829 del 4 gennaio 2022 (chiusura Piemonte) - n. 830 del 4 gennaio 2022 (chiusura Campania) - n. 831 del 4 gennaio 2022 (chiusura Liguria) - n. 839 del 12 gennaio 2022 - n. 855 del 01 febbraio 2022 (chiusura Abruzzo) - n. 860 del 3 febbraio 2022 (chiusura Toscana) - n. 878 del 25 marzo 2022 (chiusura Marche) n. 615 del 16 novembre 2019 - n. 622 del 17 dicembre 2019 - n. 674 del 15 maggio 2020 - 687 del 28 luglio 2020 - n. 731 del 31 dicembre 2020 - n. 753 del 19 marzo 2021 - n. 807 del 9 novembre 2021 - n. 809 del 25 novembre 2021 - n. 814 del 9 dicembre 2021 - n. 819 del 4 gennaio 2022 (chiusura Veneto) - n. 820 del 4 gennaio 2022 (chiusura Calabria) - n. 821 del 4 gennaio 2022 (chiusura Marche) - n. 822 del 4 gennaio 2022 (chiusura Emilia-Romagna) - n. 826 del 4 gennaio 2022 (chiusura Friuli-Venezia Giulia) n. 827 del 4 gennaio 2022 (chiusura Basilicata) - n. 828 del 4 gennaio 2022 (chiusura Puglia) - n. 829 del 4 gennaio 2022 (chiusura Piemonte) - n. 830 del 4 gennaio 2022 (chiusura Campania) - n. 831 del 4 gennaio 2022 (chiusura Liguria) - n. 839 del 12 gennaio 2022 - n. 855 del 01 febbraio 2022 (chiusura Abruzzo) - n. 860 del 3 febbraio 2022 (chiusura Toscana) - n. 878 del 25 marzo 2022 (chiusura Marche) n. 615 del 16 novembre 2019 - n. 622 del 17 dicembre 2019 - n. 674 del 15 maggio 2020 - 687 del 28 luglio 2020 - n. 731 del 31 dicembre 2020 - n. 753 del 19 marzo 2021 - n. 807 del 9 novembre 2021 - n. 809 del 25 novembre 2021 - n. 814 del 9 dicembre 2021 - n. 819 del 4 gennaio 2022 (chiusura Veneto) - n. 820 del 4 gennaio 2022 (chiusura Calabria) - n. 821 del 4 gennaio 2022 (chiusura Marche) - n. 822 del 4 gennaio 2022 (chiusura Emilia-Romagna) - n. 826 del 4 gennaio 2022 (chiusura Friuli-Venezia Giulia) n. 827 del 4 gennaio 2022 (chiusura Basilicata) - n. 828 del 4 gennaio 2022 (chiusura Puglia) - n. 829 del 4 gennaio 2022 (chiusura Piemonte) - n. 830 del 4</p> | 11/16/2019 | 11/17/2019 | 1 | 11/14/2019 | 11/14/2021 | ##### | 4,565,532.1 | 10,102,152. |
|       |   |                                                                                                                                                                                                                                                                                                                                                                                                                                                                                                                                                                                                                                                                                                                                                                                                                                                                                                                                                                                                                                                                                                                                                                                                                                                                                                                                                                                                                                                                                                                                                                                                                                                                                                                                                                                                                                                                                                                                                                                                                                                                                                                                                                                                                                                                                                                                                       |            |            |   |            |            | ##### | 0 €         | 67 €        |
| ITI11 | 1 | <p>(chiusura Veneto) - n. 820 del 4 gennaio 2022 (chiusura Calabria) - n. 821 del 4 gennaio 2022 (chiusura Marche) - n. 822 del 4 gennaio 2022 (chiusura Emilia-Romagna) - n. 826 del 4 gennaio 2022 (chiusura Friuli-Venezia Giulia) n. 827 del 4 gennaio 2022 (chiusura Basilicata) - n. 828 del 4 gennaio 2022 (chiusura Puglia) - n. 829 del 4 gennaio 2022 (chiusura Piemonte) - n. 830 del 4</p>                                                                                                                                                                                                                                                                                                                                                                                                                                                                                                                                                                                                                                                                                                                                                                                                                                                                                                                                                                                                                                                                                                                                                                                                                                                                                                                                                                                                                                                                                                                                                                                                                                                                                                                                                                                                                                                                                                                                                | 11/16/2019 | 11/17/2019 | 1 | 11/14/2019 | 11/14/2021 | ##### | 4,565,532.1 | 10,102,152. |
|       |   |                                                                                                                                                                                                                                                                                                                                                                                                                                                                                                                                                                                                                                                                                                                                                                                                                                                                                                                                                                                                                                                                                                                                                                                                                                                                                                                                                                                                                                                                                                                                                                                                                                                                                                                                                                                                                                                                                                                                                                                                                                                                                                                                                                                                                                                                                                                                                       |            |            |   |            |            | ##### | 0 €         | 67 €        |

[illegible]

[illegible]

|                                                                                                                                                                                                                                                                                                                                                                                                                                                                                                                                                                                                                                                                                                                                                                                                                                                                                                                                                                                                                                                                                                                                                                                                                                                                                                                                                                                                                                                                                                                                                                                                                                                                                                                                                                                                                                                                                                                                                                                                                                                                                                                                                                                                                                                                                                                                                                                                                                                                                                                         |   |            |            |   |            |            |       |             |             |
|-------------------------------------------------------------------------------------------------------------------------------------------------------------------------------------------------------------------------------------------------------------------------------------------------------------------------------------------------------------------------------------------------------------------------------------------------------------------------------------------------------------------------------------------------------------------------------------------------------------------------------------------------------------------------------------------------------------------------------------------------------------------------------------------------------------------------------------------------------------------------------------------------------------------------------------------------------------------------------------------------------------------------------------------------------------------------------------------------------------------------------------------------------------------------------------------------------------------------------------------------------------------------------------------------------------------------------------------------------------------------------------------------------------------------------------------------------------------------------------------------------------------------------------------------------------------------------------------------------------------------------------------------------------------------------------------------------------------------------------------------------------------------------------------------------------------------------------------------------------------------------------------------------------------------------------------------------------------------------------------------------------------------------------------------------------------------------------------------------------------------------------------------------------------------------------------------------------------------------------------------------------------------------------------------------------------------------------------------------------------------------------------------------------------------------------------------------------------------------------------------------------------------|---|------------|------------|---|------------|------------|-------|-------------|-------------|
| 2022 (chiusura Puglia) - n. 829 del 4 gennaio<br>2022 (chiusura Piemonte) - n. 830 del 4<br>gennaio 2022 (chiusura Campania) - n. 831<br>del 4 gennaio 2022 (chiusura Liguria) - n.<br>839 del 12 gennaio 2022 - n. 855 del 01<br>febbraio 2022 (chiusura Abruzzo) - n. 860<br>del 3 febbraio 2022 (chiusura Toscana) - n.<br>878 del 25 marzo 2022 (chiusura Marche)<br>n. 615 del 16 novembre 2019 - n. 622 del 17<br>dicembre 2019 - n. 674 del 15 maggio 2020 -<br>687 del 28 luglio 2020 - n. 731 del 31<br>dicembre 2020 - n. 753 del 19 marzo 2021 -<br>n. 807 del 9 novembre 2021 - n. 809 del 25<br>novembre 2021 - n. 814 del 9 dicembre<br>2021 - n. 819 del 4 gennaio 2022 (chiusura<br>Veneto) - n. 820 del 4 gennaio 2022<br>(chiusura Calabria) - n. 821 del 4 gennaio<br>2022 (chiusura Marche) - n. 822 del 4<br>gennaio 2022 (chiusura Emilia-Romagna) -<br>n. 826 del 4 gennaio 2022 (chiusura Friuli-<br>Venezia Giulia) n. 827 del 4 gennaio 2022<br>(chiusura Basilicata) - n. 828 del 4 gennaio<br>2022 (chiusura Puglia) - n. 829 del 4 gennaio<br>2022 (chiusura Piemonte) - n. 830 del 4<br>gennaio 2022 (chiusura Campania) - n. 831<br>del 4 gennaio 2022 (chiusura Liguria) - n.<br>839 del 12 gennaio 2022 - n. 855 del 01<br>febbraio 2022 (chiusura Abruzzo) - n. 860<br>del 3 febbraio 2022 (chiusura Toscana) - n.<br>878 del 25 marzo 2022 (chiusura Marche)<br>n. 615 del 16 novembre 2019 - n. 622 del 17<br>dicembre 2019 - n. 674 del 15 maggio 2020 -<br>687 del 28 luglio 2020 - n. 731 del 31<br>dicembre 2020 - n. 753 del 19 marzo 2021 -<br>n. 807 del 9 novembre 2021 - n. 809 del 25<br>novembre 2021 - n. 814 del 9 dicembre<br>2021 - n. 819 del 4 gennaio 2022 (chiusura<br>Veneto) - n. 820 del 4 gennaio 2022<br>(chiusura Calabria) - n. 821 del 4 gennaio<br>2022 (chiusura Marche) - n. 822 del 4<br>gennaio 2022 (chiusura Emilia-Romagna) -<br>n. 826 del 4 gennaio 2022 (chiusura Friuli-<br>Venezia Giulia) n. 827 del 4 gennaio 2022<br>(chiusura Basilicata) - n. 828 del 4 gennaio<br>2022 (chiusura Puglia) - n. 829 del 4 gennaio<br>2022 (chiusura Piemonte) - n. 830 del 4<br>gennaio 2022 (chiusura Campania) - n. 831<br>del 4 gennaio 2022 (chiusura Liguria) - n.<br>839 del 12 gennaio 2022 - n. 855 del 01<br>febbraio 2022 (chiusura Abruzzo) - n. 860<br>del 3 febbraio 2022 (chiusura Toscana) - n.<br>878 del 25 marzo 2022 (chiusura Marche)<br>n. 615 del 16 novembre 2019 - n. 622 del 17<br>dicembre 2019 - n. 674 del 15 maggio 2020 - |   |            |            |   |            |            |       |             |             |
| ITH36                                                                                                                                                                                                                                                                                                                                                                                                                                                                                                                                                                                                                                                                                                                                                                                                                                                                                                                                                                                                                                                                                                                                                                                                                                                                                                                                                                                                                                                                                                                                                                                                                                                                                                                                                                                                                                                                                                                                                                                                                                                                                                                                                                                                                                                                                                                                                                                                                                                                                                                   | 1 | 11/12/2019 | 11/13/2019 | 1 | 11/14/2019 | 11/14/2021 | ##### | 4,565,532.1 | 10,102,152. |
|                                                                                                                                                                                                                                                                                                                                                                                                                                                                                                                                                                                                                                                                                                                                                                                                                                                                                                                                                                                                                                                                                                                                                                                                                                                                                                                                                                                                                                                                                                                                                                                                                                                                                                                                                                                                                                                                                                                                                                                                                                                                                                                                                                                                                                                                                                                                                                                                                                                                                                                         |   |            |            |   |            |            | ##### | 0 €         | 67 €        |
| ITH37                                                                                                                                                                                                                                                                                                                                                                                                                                                                                                                                                                                                                                                                                                                                                                                                                                                                                                                                                                                                                                                                                                                                                                                                                                                                                                                                                                                                                                                                                                                                                                                                                                                                                                                                                                                                                                                                                                                                                                                                                                                                                                                                                                                                                                                                                                                                                                                                                                                                                                                   | 1 | 11/12/2019 | 11/13/2019 | 1 | 11/14/2019 | 11/14/2021 | ##### | 4,565,532.1 | 10,102,152. |
|                                                                                                                                                                                                                                                                                                                                                                                                                                                                                                                                                                                                                                                                                                                                                                                                                                                                                                                                                                                                                                                                                                                                                                                                                                                                                                                                                                                                                                                                                                                                                                                                                                                                                                                                                                                                                                                                                                                                                                                                                                                                                                                                                                                                                                                                                                                                                                                                                                                                                                                         |   |            |            |   |            |            | ##### | 0 €         | 67 €        |
| ITH34                                                                                                                                                                                                                                                                                                                                                                                                                                                                                                                                                                                                                                                                                                                                                                                                                                                                                                                                                                                                                                                                                                                                                                                                                                                                                                                                                                                                                                                                                                                                                                                                                                                                                                                                                                                                                                                                                                                                                                                                                                                                                                                                                                                                                                                                                                                                                                                                                                                                                                                   | 1 | 11/12/2019 | 11/13/2019 | 1 | 11/14/2019 | 11/14/2021 | ##### | 4,565,532.1 | 10,102,152. |
|                                                                                                                                                                                                                                                                                                                                                                                                                                                                                                                                                                                                                                                                                                                                                                                                                                                                                                                                                                                                                                                                                                                                                                                                                                                                                                                                                                                                                                                                                                                                                                                                                                                                                                                                                                                                                                                                                                                                                                                                                                                                                                                                                                                                                                                                                                                                                                                                                                                                                                                         |   |            |            |   |            |            | ##### | 0 €         | 67 €        |

[illegible]

|       |   |                                                                                                                                                                                                                                                                                                                                                                                                                                                                                                                                                                                                                                                                                                                                                                                                                                                                                                                                                                                                                                                                                                                                                                                                                                                                                                                                                                                                                                                                                                                                                                                                                                                                                                                                                                                                                                                                                                                                                                                                                                                                                                                                                                                                                                                                                                                                                 |            |            |   |            |            |       |             |             |
|-------|---|-------------------------------------------------------------------------------------------------------------------------------------------------------------------------------------------------------------------------------------------------------------------------------------------------------------------------------------------------------------------------------------------------------------------------------------------------------------------------------------------------------------------------------------------------------------------------------------------------------------------------------------------------------------------------------------------------------------------------------------------------------------------------------------------------------------------------------------------------------------------------------------------------------------------------------------------------------------------------------------------------------------------------------------------------------------------------------------------------------------------------------------------------------------------------------------------------------------------------------------------------------------------------------------------------------------------------------------------------------------------------------------------------------------------------------------------------------------------------------------------------------------------------------------------------------------------------------------------------------------------------------------------------------------------------------------------------------------------------------------------------------------------------------------------------------------------------------------------------------------------------------------------------------------------------------------------------------------------------------------------------------------------------------------------------------------------------------------------------------------------------------------------------------------------------------------------------------------------------------------------------------------------------------------------------------------------------------------------------|------------|------------|---|------------|------------|-------|-------------|-------------|
| <hr/> |   |                                                                                                                                                                                                                                                                                                                                                                                                                                                                                                                                                                                                                                                                                                                                                                                                                                                                                                                                                                                                                                                                                                                                                                                                                                                                                                                                                                                                                                                                                                                                                                                                                                                                                                                                                                                                                                                                                                                                                                                                                                                                                                                                                                                                                                                                                                                                                 |            |            |   |            |            |       |             |             |
| ITH32 | 1 | Vnezia Giulia) n. 827 del 4 gennio 2022 (chiusura Basilicata) - n. 828 del 4 gennaio 2022 (chiusura Puglia) - n. 829 del 4 gennaio 2022 (chiusura Piemonte) - n. 830 del 4 gennaio 2022 (chiusura Campania) - n. 831 del 4 gennaio 2022 (chiusura Liguria) - n. 839 del 12 gennaio 2022 - n. 855 del 01 febbraio 2022 (chiusura Abruzzo) - n. 860 del 3 febbraio 2022 (chiusura Toscana) - n. 878 del 25 marzo 2022 (chiusura Marche) n. 615 del 16 novembre 2019 - n. 622 del 17 dicembre 2019 - n. 674 del 15 maggio 2020 - 687 del 28 luglio 2020 - n. 731 del 31 dicembre 2020 - n. 753 del 19 marzo 2021 - n. 807 del 9 novembre 2021 - n. 809 del 25 novembre 2021 - n. 814 del 9 dicembre 2021 - n. 819 del 4 gennaio 2022 (chiusura Veneto) - n. 820 del 4 gennaio 2022 (chiusura Calabria) - n. 821 del 4 gennaio 2022 (chiusura Marche) - n. 822 del 4 gennaio 2022 (chiusura Emilia-Romagna) - n. 826 del 4 gennaio 2022 (chiusura Friuli-Vnezia Giulia) n. 827 del 4 gennio 2022 (chiusura Basilicata) - n. 828 del 4 gennaio 2022 (chiusura Puglia) - n. 829 del 4 gennaio 2022 (chiusura Piemonte) - n. 830 del 4 gennaio 2022 (chiusura Campania) - n. 831 del 4 gennaio 2022 (chiusura Liguria) - n. 839 del 12 gennaio 2022 - n. 855 del 01 febbraio 2022 (chiusura Abruzzo) - n. 860 del 3 febbraio 2022 (chiusura Toscana) - n. 878 del 25 marzo 2022 (chiusura Marche) n. 615 del 16 novembre 2019 - n. 622 del 17 dicembre 2019 - n. 674 del 15 maggio 2020 - 687 del 28 luglio 2020 - n. 731 del 31 dicembre 2020 - n. 753 del 19 marzo 2021 - n. 807 del 9 novembre 2021 - n. 809 del 25 novembre 2021 - n. 814 del 9 dicembre 2021 - n. 819 del 4 gennaio 2022 (chiusura Veneto) - n. 820 del 4 gennaio 2022 (chiusura Calabria) - n. 821 del 4 gennaio 2022 (chiusura Marche) - n. 822 del 4 gennaio 2022 (chiusura Emilia-Romagna) - n. 826 del 4 gennaio 2022 (chiusura Friuli-Vnezia Giulia) n. 827 del 4 gennio 2022 (chiusura Basilicata) - n. 828 del 4 gennaio 2022 (chiusura Puglia) - n. 829 del 4 gennaio 2022 (chiusura Piemonte) - n. 830 del 4 gennaio 2022 (chiusura Campania) - n. 831 del 4 gennaio 2022 (chiusura Liguria) - n. 839 del 12 gennaio 2022 - n. 855 del 01 febbraio 2022 (chiusura Abruzzo) - n. 860 del 3 febbraio 2022 (chiusura Toscana) - n. 878 del 25 marzo 2022 (chiusura Marche) | 11/12/2019 | 11/13/2019 | 1 | 11/14/2019 | 11/14/2021 | ##### | 4,565,532.1 | 10,102,152. |
|       |   |                                                                                                                                                                                                                                                                                                                                                                                                                                                                                                                                                                                                                                                                                                                                                                                                                                                                                                                                                                                                                                                                                                                                                                                                                                                                                                                                                                                                                                                                                                                                                                                                                                                                                                                                                                                                                                                                                                                                                                                                                                                                                                                                                                                                                                                                                                                                                 |            |            |   |            |            |       | 0 €         | 67 €        |
| ITC33 | 1 | Vnezia Giulia) n. 827 del 4 gennio 2022 (chiusura Basilicata) - n. 828 del 4 gennaio 2022 (chiusura Puglia) - n. 829 del 4 gennaio 2022 (chiusura Piemonte) - n. 830 del 4 gennaio 2022 (chiusura Campania) - n. 831 del 4 gennaio 2022 (chiusura Liguria) - n. 839 del 12 gennaio 2022 - n. 855 del 01 febbraio 2022 (chiusura Abruzzo) - n. 860 del 3 febbraio 2022 (chiusura Toscana) - n. 878 del 25 marzo 2022 (chiusura Marche) n. 615 del 16 novembre 2019 - n. 622 del 17 dicembre 2019 - n. 674 del 15 maggio 2020 - 687 del 28 luglio 2020 - n. 731 del 31 dicembre 2020 - n. 753 del 19 marzo 2021 - n. 807 del 9 novembre 2021 - n. 809 del 25 novembre 2021 - n. 814 del 9 dicembre 2021 - n. 819 del 4 gennaio 2022 (chiusura Veneto) - n. 820 del 4 gennaio 2022 (chiusura Calabria) - n. 821 del 4 gennaio 2022 (chiusura Marche) - n. 822 del 4 gennaio 2022 (chiusura Emilia-Romagna) - n. 826 del 4 gennaio 2022 (chiusura Friuli-Vnezia Giulia) n. 827 del 4 gennio 2022 (chiusura Basilicata) - n. 828 del 4 gennaio 2022 (chiusura Puglia) - n. 829 del 4 gennaio 2022 (chiusura Piemonte) - n. 830 del 4 gennaio 2022 (chiusura Campania) - n. 831 del 4 gennaio 2022 (chiusura Liguria) - n. 839 del 12 gennaio 2022 - n. 855 del 01 febbraio 2022 (chiusura Abruzzo) - n. 860 del 3 febbraio 2022 (chiusura Toscana) - n. 878 del 25 marzo 2022 (chiusura Marche)                                                                                                                                                                                                                                                                                                                                                                                                                                                                                                                                                                                                                                                                                                                                                                                                                                                                                                                                                      | 10/14/2019 | 11/8/2019  | 2 | 11/14/2019 | 11/14/2021 | ##### | 4,565,532.1 | 10,102,152. |
|       |   |                                                                                                                                                                                                                                                                                                                                                                                                                                                                                                                                                                                                                                                                                                                                                                                                                                                                                                                                                                                                                                                                                                                                                                                                                                                                                                                                                                                                                                                                                                                                                                                                                                                                                                                                                                                                                                                                                                                                                                                                                                                                                                                                                                                                                                                                                                                                                 |            |            |   |            |            |       | 0 €         | 67 €        |
| <hr/> |   |                                                                                                                                                                                                                                                                                                                                                                                                                                                                                                                                                                                                                                                                                                                                                                                                                                                                                                                                                                                                                                                                                                                                                                                                                                                                                                                                                                                                                                                                                                                                                                                                                                                                                                                                                                                                                                                                                                                                                                                                                                                                                                                                                                                                                                                                                                                                                 |            |            |   |            |            |       |             |             |

|       |   |                                                                                                                                                                                                                                                                                                                                                                                                                                                                                                                                                                                                                                                                                                                                                                                                                                                                                                                                                        |            |           |   |            |            |       |             |             |
|-------|---|--------------------------------------------------------------------------------------------------------------------------------------------------------------------------------------------------------------------------------------------------------------------------------------------------------------------------------------------------------------------------------------------------------------------------------------------------------------------------------------------------------------------------------------------------------------------------------------------------------------------------------------------------------------------------------------------------------------------------------------------------------------------------------------------------------------------------------------------------------------------------------------------------------------------------------------------------------|------------|-----------|---|------------|------------|-------|-------------|-------------|
| ITC31 | 1 | n. 615 del 16 novembre 2019 - n. 622 del 17 dicembre 2019 - n. 674 del 15 maggio 2020 - 687 del 28 luglio 2020 - n. 731 del 31 dicembre 2020 - n. 753 del 19 marzo 2021 - n. 807 del 9 novembre 2021 - n. 809 del 25 novembre 2021 - n. 814 del 9 dicembre 2021 - n. 819 del 4 gennaio 2022 (chiusura Veneto) - n. 820 del 4 gennaio 2022 (chiusura Calabria) - n. 821 del 4 gennaio 2022 (chiusura Marche) - n. 822 del 4 gennaio 2022 (chiusura Emilia-Romagna) - n. 826 del 4 gennaio 2022 (chiusura Friuli-Venezia Giulia) n. 827 del 4 gennaio 2022 (chiusura Basilicata) - n. 828 del 4 gennaio 2022 (chiusura Puglia) - n. 829 del 4 gennaio 2022 (chiusura Piemonte) - n. 830 del 4 gennaio 2022 (chiusura Campania) - n. 831 del 4 gennaio 2022 (chiusura Liguria) - n. 839 del 12 gennaio 2022 - n. 855 del 01 febbraio 2022 (chiusura Abruzzo) - n. 860 del 3 febbraio 2022 (chiusura Toscana) - n. 878 del 25 marzo 2022 (chiusura Marche) | 10/14/2019 | 11/8/2019 | 2 | 11/14/2019 | 11/14/2021 | ##### | 4,565,532.1 | 10,102,152. |
|       |   |                                                                                                                                                                                                                                                                                                                                                                                                                                                                                                                                                                                                                                                                                                                                                                                                                                                                                                                                                        |            |           |   |            |            |       |             |             |
|       |   |                                                                                                                                                                                                                                                                                                                                                                                                                                                                                                                                                                                                                                                                                                                                                                                                                                                                                                                                                        |            |           |   |            |            |       |             |             |
| ITC34 | 1 | n. 615 del 16 novembre 2019 - n. 622 del 17 dicembre 2019 - n. 674 del 15 maggio 2020 - 687 del 28 luglio 2020 - n. 731 del 31 dicembre 2020 - n. 753 del 19 marzo 2021 - n. 807 del 9 novembre 2021 - n. 809 del 25 novembre 2021 - n. 814 del 9 dicembre 2021 - n. 819 del 4 gennaio 2022 (chiusura Veneto) - n. 820 del 4 gennaio 2022 (chiusura Calabria) - n. 821 del 4 gennaio 2022 (chiusura Marche) - n. 822 del 4 gennaio 2022 (chiusura Emilia-Romagna) - n. 826 del 4 gennaio 2022 (chiusura Friuli-Venezia Giulia) n. 827 del 4 gennaio 2022 (chiusura Basilicata) - n. 828 del 4 gennaio 2022 (chiusura Puglia) - n. 829 del 4 gennaio 2022 (chiusura Piemonte) - n. 830 del 4 gennaio 2022 (chiusura Campania) - n. 831 del 4 gennaio 2022 (chiusura Liguria) - n. 839 del 12 gennaio 2022 - n. 855 del 01 febbraio 2022 (chiusura Abruzzo) - n. 860 del 3 febbraio 2022 (chiusura Toscana) - n. 878 del 25 marzo 2022 (chiusura Marche) | 10/14/2019 | 11/8/2019 | 2 | 11/14/2019 | 11/14/2021 | ##### | 4,565,532.1 | 10,102,152. |
|       |   |                                                                                                                                                                                                                                                                                                                                                                                                                                                                                                                                                                                                                                                                                                                                                                                                                                                                                                                                                        |            |           |   |            |            |       |             |             |
|       |   |                                                                                                                                                                                                                                                                                                                                                                                                                                                                                                                                                                                                                                                                                                                                                                                                                                                                                                                                                        |            |           |   |            |            |       |             |             |
| ITC32 | 1 | n. 615 del 16 novembre 2019 - n. 622 del 17 dicembre 2019 - n. 674 del 15 maggio 2020 - 687 del 28 luglio 2020 - n. 731 del 31 dicembre 2020 - n. 753 del 19 marzo 2021 - n. 807 del 9 novembre 2021 - n. 809 del 25 novembre 2021 - n. 814 del 9 dicembre 2021 - n. 819 del 4 gennaio 2022 (chiusura Veneto) - n. 820 del 4 gennaio 2022 (chiusura Calabria) - n. 821 del 4 gennaio 2022 (chiusura Marche) - n. 822 del 4                                                                                                                                                                                                                                                                                                                                                                                                                                                                                                                             | 10/14/2019 | 11/8/2019 | 2 | 11/14/2019 | 11/14/2021 | ##### | 4,565,532.1 | 10,102,152. |
|       |   |                                                                                                                                                                                                                                                                                                                                                                                                                                                                                                                                                                                                                                                                                                                                                                                                                                                                                                                                                        |            |           |   |            |            |       |             |             |
|       |   |                                                                                                                                                                                                                                                                                                                                                                                                                                                                                                                                                                                                                                                                                                                                                                                                                                                                                                                                                        |            |           |   |            |            |       |             |             |



|       |   |                                                                                                                                                                                                                                                                                                                                                                                                                                                                                                                                                                                                                                                  |            |            |            |            |          |          |   |            |            |                 |                |                  |
|-------|---|--------------------------------------------------------------------------------------------------------------------------------------------------------------------------------------------------------------------------------------------------------------------------------------------------------------------------------------------------------------------------------------------------------------------------------------------------------------------------------------------------------------------------------------------------------------------------------------------------------------------------------------------------|------------|------------|------------|------------|----------|----------|---|------------|------------|-----------------|----------------|------------------|
|       |   | gennaio 2022 (chiusura Emilia-Romagna) - n. 826 del 4 gennaio 2022 (chiusura Friuli-Venezia Giulia) n. 827 del 4 gennaio 2022 (chiusura Basilicata) - n. 828 del 4 gennaio 2022 (chiusura Puglia) - n. 829 del 4 gennaio 2022 (chiusura Piemonte) - n. 830 del 4 gennaio 2022 (chiusura Campania) - n. 831 del 4 gennaio 2022 (chiusura Liguria) - n. 839 del 12 gennaio 2022 - n. 855 del 01 febbraio 2022 (chiusura Abruzzo) - n. 860 del 3 febbraio 2022 (chiusura Toscana) - n. 878 del 25 marzo 2022 (chiusura Marche) n. 700 dell' 8 settembre 2020 - n. 807 del 9 novembre 2021 - n. 814 del 9 dicembre 2021 - n. 839 del 12 gennaio 2022 | 10/30/2019 | 11/30/2019 |            |            |          |          | 3 | 3/16/2020  | 3/16/2022  | 1,923,000.89 €  | 3,493,596.93 € | 137,448,982.65 € |
| ITI41 | 1 | n. 700 dell' 8 settembre 2020 - n. 807 del 9 novembre 2021 - n. 814 del 9 dicembre 2021 - n. 839 del 12 gennaio 2022                                                                                                                                                                                                                                                                                                                                                                                                                                                                                                                             | 10/30/2019 | 11/30/2019 |            |            |          |          | 3 | 3/16/2020  | 3/16/2022  | 1,923,000.89 €  | 3,493,596.93 € | 137,448,982.65 € |
| ITI42 | 1 | n. 700 dell' 8 settembre 2020 - n. 807 del 9 novembre 2021 - n. 814 del 9 dicembre 2021 - n. 839 del 12 gennaio 2022                                                                                                                                                                                                                                                                                                                                                                                                                                                                                                                             | 10/30/2019 | 11/30/2019 |            |            |          |          | 3 | 3/16/2020  | 3/16/2022  | 1,923,000.89 €  | 3,493,596.93 € | 137,448,982.65 € |
| ITI43 | 1 | n. 700 dell' 8 settembre 2020 - n. 807 del 9 novembre 2021 - n. 814 del 9 dicembre 2021 - n. 839 del 12 gennaio 2022                                                                                                                                                                                                                                                                                                                                                                                                                                                                                                                             | 10/30/2019 | 11/30/2019 |            |            |          |          | 3 | 3/16/2020  | 3/16/2022  | 1,923,000.89 €  | 3,493,596.93 € | 137,448,982.65 € |
| ITI44 | 1 | n. 700 dell' 8 settembre 2020 - n. 807 del 9 novembre 2021 - n. 814 del 9 dicembre 2021 - n. 839 del 12 gennaio 2022                                                                                                                                                                                                                                                                                                                                                                                                                                                                                                                             | 10/30/2019 | 11/30/2019 |            |            |          |          | 3 | 3/16/2020  | 3/16/2022  | 1,923,000.89 €  | 3,493,596.93 € | 137,448,982.65 € |
| ITI45 | 1 | n. 700 dell' 8 settembre 2020 - n. 807 del 9 novembre 2021 - n. 814 del 9 dicembre 2021 - n. 839 del 12 gennaio 2022                                                                                                                                                                                                                                                                                                                                                                                                                                                                                                                             | 10/30/2019 | 11/30/2019 |            |            |          |          | 3 | 3/16/2020  | 3/16/2022  | 1,923,000.89 €  | 3,493,596.93 € | 137,448,982.65 € |
| ITH35 | 1 | n. 616 del 16 novembre 2019 - n. 807 del 9 novembre 2021 - n. 824 del 4 gennaio 2022 - n. 851 del 24 gennaio 2022 (chiusura)                                                                                                                                                                                                                                                                                                                                                                                                                                                                                                                     | 11/12/2019 | 11/12/2019 |            |            |          |          | 1 | 11/14/2019 | 11/14/2021 | 62,023,647.79 € | N/A            | 228,406,106.69 € |
| ITC33 | 1 | n. 621 del 12 dicembre 2019 - n. 807 del 9 novembre 2021 - n. 831 del 4 gennaio 2022 (chiusura)                                                                                                                                                                                                                                                                                                                                                                                                                                                                                                                                                  | 11/22/2019 | 11/24/2019 |            |            |          |          | 1 | 11/21/2019 | 11/21/2021 | 9,300,000.00 €  | N/A            | N/A              |
| ITC31 | 0 | n. 621 del 12 dicembre 2019 - n. 807 del 9 novembre 2021 - n. 831 del 4 gennaio 2022 (chiusura)                                                                                                                                                                                                                                                                                                                                                                                                                                                                                                                                                  | 11/22/2019 | 11/24/2019 |            |            |          |          | 1 | 11/21/2019 | 11/21/2021 | 9,300,000.00 €  | N/A            | N/A              |
| ITC34 | 1 | n. 621 del 12 dicembre 2019 - n. 807 del 9 novembre 2021 - n. 831 del 4 gennaio 2022 (chiusura)                                                                                                                                                                                                                                                                                                                                                                                                                                                                                                                                                  | 11/22/2019 | 11/24/2019 |            |            |          |          | 1 | 11/21/2019 | 11/21/2021 | 9,300,000.00 €  | N/A            | N/A              |
| ITC32 | 1 | n. 621 del 12 dicembre 2019 - n. 807 del 9 novembre 2021 - n. 831 del 4 gennaio 2022 (chiusura)                                                                                                                                                                                                                                                                                                                                                                                                                                                                                                                                                  | 11/22/2019 | 11/24/2019 |            |            |          |          | 1 | 11/21/2019 | 11/21/2021 | 9,300,000.00 €  | N/A            | N/A              |
| ITG14 | 0 | n. 713 del 17 novembre 2020 - n. 814 del 9 dicembre 2021 - n. 839 del 12 gennaio 2022                                                                                                                                                                                                                                                                                                                                                                                                                                                                                                                                                            | 12/13/2019 | 12/14/2019 | 12/23/2019 | 12/23/2019 | 1/4/2020 | 1/6/2020 | 1 | 10/22/2020 | 10/22/2022 | 2,100,000.00 €  | 140,000.00 €   | 5,414,145.00 €   |
| ITG15 | 0 | n. 713 del 17 novembre 2020 - n. 814 del 9 dicembre 2021 - n. 839 del 12 gennaio 2022                                                                                                                                                                                                                                                                                                                                                                                                                                                                                                                                                            | 12/13/2019 | 12/14/2019 | 12/23/2019 | 12/23/2019 | 1/4/2020 | 1/6/2020 | 1 | 10/22/2020 | 10/22/2022 | 2,100,000.00 €  | 140,000.00 €   | 5,414,145.00 €   |
| ITG17 | 0 | n. 713 del 17 novembre 2020 - n. 814 del 9 dicembre 2021 - n. 839 del 12 gennaio 2022                                                                                                                                                                                                                                                                                                                                                                                                                                                                                                                                                            | 12/13/2019 | 12/14/2019 | 12/23/2019 | 12/23/2019 | 1/4/2020 | 1/6/2020 | 1 | 10/22/2020 | 10/22/2022 | 2,100,000.00 €  | 140,000.00 €   | 5,414,145.00 €   |
| ITG16 | 0 | n. 713 del 17 novembre 2020 - n. 814 del 9 dicembre 2021 - n. 839 del 12 gennaio 2022                                                                                                                                                                                                                                                                                                                                                                                                                                                                                                                                                            | 12/13/2019 | 12/14/2019 | 12/23/2019 | 12/23/2019 | 1/4/2020 | 1/6/2020 | 1 | 10/22/2020 | 10/22/2022 | 2,100,000.00 €  | 140,000.00 €   | 5,414,145.00 €   |
| ITG13 | 1 | n. 713 del 17 novembre 2020 - n. 814 del 9 dicembre 2021 - n. 839 del 12 gennaio 2022                                                                                                                                                                                                                                                                                                                                                                                                                                                                                                                                                            | 12/13/2019 | 12/14/2019 | 12/23/2019 | 12/23/2019 | 1/4/2020 | 1/6/2020 | 1 | 10/22/2020 | 10/22/2022 | 2,100,000.00 €  | 140,000.00 €   | 5,414,145.00 €   |
| ITG12 | 1 | n. 713 del 17 novembre 2020 - n. 814 del 9 dicembre 2021 - n. 839 del 12 gennaio 2022                                                                                                                                                                                                                                                                                                                                                                                                                                                                                                                                                            | 12/13/2019 | 12/14/2019 | 12/23/2019 | 12/23/2019 | 1/4/2020 | 1/6/2020 | 1 | 10/22/2020 | 10/22/2022 | 2,100,000.00 €  | 140,000.00 €   | 5,414,145.00 €   |

|       |   |                                                                                                                           |            |            |            |            |           |           |   |            |            |                 |                 |                  |
|-------|---|---------------------------------------------------------------------------------------------------------------------------|------------|------------|------------|------------|-----------|-----------|---|------------|------------|-----------------|-----------------|------------------|
| ITG18 | 0 | n. 713 del 17 novembre 2020 - n. 814 del 9 dicembre 2021 - n. 839 del 12 gennaio 2022                                     | 12/13/2019 | 12/14/2019 | 12/23/2019 | 12/23/2019 | 1/4/2020  | 1/6/2020  | 1 | 10/22/2020 | 10/22/2022 | 2,100,000.00 €  | 140,000.00 €    | 5,414,145.00 €   |
| ITG19 | 0 | n. 713 del 17 novembre 2020 - n. 814 del 9 dicembre 2021 - n. 839 del 12 gennaio 2022                                     | 12/13/2019 | 12/14/2019 | 12/23/2019 | 12/23/2019 | 1/4/2020  | 1/6/2020  | 1 | 10/22/2020 | 10/22/2022 | 2,100,000.00 €  | 140,000.00 €    | 5,414,145.00 €   |
| ITG11 | 0 | n. 713 del 17 novembre 2020 - n. 814 del 9 dicembre 2021 - n. 839 del 12 gennaio 2022                                     | 12/13/2019 | 12/14/2019 | 12/23/2019 | 12/23/2019 | 1/4/2020  | 1/6/2020  | 1 | 10/22/2020 | 10/22/2022 | 2,100,000.00 €  | 140,000.00 €    | 5,414,145.00 €   |
| ITC33 | 1 | n. 647 del 9 marzo 2020 - n. 831 del 4 gennaio 2022 (chiusura)                                                            | 12/20/2019 | 12/21/2019 |            |            |           |           | 1 | 2/13/2020  | 2/13/2022  | 8,100,000.00 €  | 30,211,835.28 € | 62,840,329.08 €  |
| ITC31 | 1 | n. 647 del 9 marzo 2020 - n. 831 del 4 gennaio 2022 (chiusura)                                                            | 12/20/2019 | 12/21/2019 |            |            |           |           | 1 | 2/13/2020  | 2/13/2022  | 8,100,000.00 €  | 30,211,835.28 € | 62,840,329.08 €  |
| ITC34 | 1 | n. 647 del 9 marzo 2020 - n. 831 del 4 gennaio 2022 (chiusura)                                                            | 12/20/2019 | 12/21/2019 |            |            |           |           | 1 | 2/13/2020  | 2/13/2022  | 8,100,000.00 €  | 30,211,835.28 € | 62,840,329.08 €  |
| ITC32 | 1 | n. 647 del 9 marzo 2020 - n. 831 del 4 gennaio 2022 (chiusura)                                                            | 12/20/2019 | 12/21/2019 |            |            |           |           | 1 | 2/13/2020  | 2/13/2022  | 8,100,000.00 €  | 30,211,835.28 € | 62,840,329.08 €  |
| ITF31 | 1 | n. 649 del 10 marzo 2020 - n. 814 del 9 dicembre 2021 - n. 839 del 12 gennaio 2022 - n. 889 del 20 aprile 2022 (chiusura) | 12/21/2019 | 12/22/2019 |            |            |           |           | 1 | 2/13/2020  | 2/13/2022  | 6,614,400.65 €  | 7,301,989.87 €  | 60,847,543.82 €  |
| ITF32 | 1 | n. 649 del 10 marzo 2020 - n. 814 del 9 dicembre 2021 - n. 839 del 12 gennaio 2022 - n. 889 del 20 aprile 2022 (chiusura) | 12/21/2019 | 12/22/2019 |            |            |           |           | 1 | 2/13/2020  | 2/13/2022  | 6,614,400.65 €  | 7,301,989.87 €  | 60,847,543.82 €  |
| ITF33 | 1 | n. 649 del 10 marzo 2020 - n. 814 del 9 dicembre 2021 - n. 839 del 12 gennaio 2022 - n. 889 del 20 aprile 2022 (chiusura) | 12/21/2019 | 12/22/2019 |            |            |           |           | 1 | 2/13/2020  | 2/13/2022  | 6,614,400.65 €  | 7,301,989.87 €  | 60,847,543.82 €  |
| ITF34 | 1 | n. 649 del 10 marzo 2020 - n. 814 del 9 dicembre 2021 - n. 839 del 12 gennaio 2022 - n. 889 del 20 aprile 2022 (chiusura) | 12/21/2019 | 12/22/2019 |            |            |           |           | 1 | 2/13/2020  | 2/13/2022  | 6,614,400.65 €  | 7,301,989.87 €  | 60,847,543.82 €  |
| ITF35 | 1 | n. 649 del 10 marzo 2020 - n. 814 del 9 dicembre 2021 - n. 839 del 12 gennaio 2022 - n. 889 del 20 aprile 2022 (chiusura) | 12/21/2019 | 12/22/2019 |            |            |           |           | 1 | 2/13/2020  | 2/13/2022  | 6,614,400.65 €  | 7,301,989.87 €  | 60,847,543.82 €  |
| ITF61 | 1 | n. 653 del 20 marzo 2020 - n. 814 del 9 dicembre 2021 - n. 839 del 12 gennaio 2022                                        | 12/21/2019 | 12/24/2019 |            |            |           |           | 1 | 2/28/2020  | 2/28/2022  | 9,418,810.43 €  | 1,638,824.73 €  | 20,685,553.44 €  |
| ITF63 | 1 | n. 653 del 20 marzo 2020 - n. 814 del 9 dicembre 2021 - n. 839 del 12 gennaio 2022                                        | 12/21/2019 | 12/24/2019 |            |            |           |           | 1 | 2/28/2020  | 2/28/2022  | 9,418,810.43 €  | 1,638,824.73 €  | 20,685,553.44 €  |
| ITF65 | 1 | n. 653 del 20 marzo 2020 - n. 814 del 9 dicembre 2021 - n. 839 del 12 gennaio 2022                                        | 12/21/2019 | 12/24/2019 |            |            |           |           | 1 | 2/28/2020  | 2/28/2022  | 9,418,810.43 €  | 1,638,824.73 €  | 20,685,553.44 €  |
| ITF64 | 1 | n. 653 del 20 marzo 2020 - n. 814 del 9 dicembre 2021 - n. 839 del 12 gennaio 2022                                        | 12/21/2019 | 12/24/2019 |            |            |           |           | 1 | 2/28/2020  | 2/28/2022  | 9,418,810.43 €  | 1,638,824.73 €  | 20,685,553.44 €  |
| ITC11 | 1 | n. 743 del 16 febbraio 2021 - 832 del 5 gennaio 2022 (chiusura) - n. 839 del 12 gennaio 2022                              | 5/9/2020   | 5/19/2020  | 6/3/2020   | 6/11/2020  |           |           | 1 | 10/22/2020 | 10/22/2021 | 687,017.17 €    | 20,141.42 €     | 3,240,215.51 €   |
| ITH31 | 1 | n.704 del 1 ottobre 2020 - n. 793 del 7 settembre 2021 - n. 839 del 12 gennaio 2021                                       | 8/1/2020   | 8/4/2020   | 8/22/2020  | 8/24/2020  | 8/28/2020 | 8/30/2020 | 1 | 9/10/2020  | 9/10/2022  | 6,800,000.00 €  | 16,813,775.59 € | 160,135,644.52 € |
| ITH32 | 1 | n.704 del 1 ottobre 2020 - n. 793 del 7 settembre 2021 - n. 839 del 12 gennaio 2021                                       | 8/1/2020   | 8/4/2020   | 8/22/2020  | 8/24/2020  | 8/28/2020 | 8/30/2020 | 1 | 9/10/2020  | 9/10/2022  | 6,800,000.00 €  | 16,813,775.59 € | 160,135,644.52 € |
| ITH33 | 1 | n.704 del 1 ottobre 2020 - n. 793 del 7 settembre 2021 - n. 839 del 12 gennaio 2021                                       | 8/1/2020   | 8/4/2020   | 8/22/2020  | 8/24/2020  | 8/28/2020 | 8/30/2020 | 1 | 9/10/2020  | 9/10/2022  | 6,800,000.00 €  | 16,813,775.59 € | 160,135,644.52 € |
| ITH36 | 1 | n.704 del 1 ottobre 2020 - n. 793 del 7 settembre 2021 - n. 839 del 12 gennaio 2021                                       | 8/1/2020   | 8/4/2020   | 8/22/2020  | 8/24/2020  | 8/28/2020 | 8/30/2020 | 1 | 9/10/2020  | 9/10/2022  | 6,800,000.00 €  | 16,813,775.59 € | 160,135,644.52 € |
| ITC18 | 0 | n. 710 del 9 novembre 2020 - n. 745 del 23 febbraio 2021 - n. 839 del 12 gennaio 2022                                     | 10/2/2020  | 10/3/2020  |            |            |           |           | 1 | 10/22/2020 | 4/22/2022  | 80,792,490.01 € | 28,817,039.86 € | 1,004,439.90 €   |
| ITC13 | 1 | n. 710 del 9 novembre 2020 - n. 745 del 23 febbraio 2021 - n. 839 del 12 gennaio 2022                                     | 10/2/2020  | 10/3/2020  |            |            |           |           | 1 | 10/22/2020 | 4/22/2022  | 80,792,490.01 € | 28,817,039.86 € | 1,004,439.90 €   |
| ITC16 | 1 | n. 710 del 9 novembre 2020 - n. 745 del 23 febbraio 2021 - n. 839 del 12 gennaio 2022                                     | 10/2/2020  | 10/3/2020  |            |            |           |           | 1 | 10/22/2020 | 4/22/2022  | 80,792,490.01 € | 28,817,039.86 € | 1,004,439.90 €   |

|       |   |                                                                                       |            |            |            |            |           |           |  |   |            |            |                 |                 |                    |
|-------|---|---------------------------------------------------------------------------------------|------------|------------|------------|------------|-----------|-----------|--|---|------------|------------|-----------------|-----------------|--------------------|
| ITC15 | 1 | n. 710 del 9 novembre 2020 - n. 745 del 23 febbraio 2021 - n. 839 del 12 gennaio 2022 | 10/2/2020  | 10/3/2020  |            |            |           |           |  | 1 | 10/22/2020 | 4/22/2022  | 80,792,490.01 € | 28,817,039.86 € | 1,004,439.906.99 € |
| ITC11 | 0 | n. 710 del 9 novembre 2020 - n. 745 del 23 febbraio 2021 - n. 839 del 12 gennaio 2022 | 10/2/2020  | 10/3/2020  |            |            |           |           |  | 1 | 10/22/2020 | 4/22/2022  | 80,792,490.01 € | 28,817,039.86 € | 1,004,439.906.99 € |
| ITC12 | 1 | n. 710 del 9 novembre 2020 - n. 745 del 23 febbraio 2021 - n. 839 del 12 gennaio 2022 | 10/2/2020  | 10/3/2020  |            |            |           |           |  | 1 | 10/22/2020 | 4/22/2022  | 80,792,490.01 € | 28,817,039.86 € | 1,004,439.906.99 € |
| ITC14 | 1 | n. 710 del 9 novembre 2020 - n. 745 del 23 febbraio 2021 - n. 839 del 12 gennaio 2022 | 10/2/2020  | 10/3/2020  |            |            |           |           |  | 1 | 10/22/2020 | 4/22/2022  | 80,792,490.01 € | 28,817,039.86 € | 1,004,439.906.99 € |
| ITC33 | 0 | n. 710 del 9 novembre 2020 - n. 745 del 23 febbraio 2021 - n. 839 del 12 gennaio 2022 | 10/2/2020  | 10/3/2020  |            |            |           |           |  | 1 | 10/22/2020 | 4/22/2022  | 80,792,490.01 € | 28,817,039.86 € | 1,004,439.906.99 € |
| ITC31 | 1 | n. 710 del 9 novembre 2020 - n. 745 del 23 febbraio 2021 - n. 839 del 12 gennaio 2022 | 10/2/2020  | 10/3/2020  |            |            |           |           |  | 1 | 10/22/2020 | 4/22/2022  | 80,792,490.01 € | 28,817,039.86 € | 1,004,439.906.99 € |
| ITC34 | 0 | n. 710 del 9 novembre 2020 - n. 745 del 23 febbraio 2021 - n. 839 del 12 gennaio 2022 | 10/2/2020  | 10/3/2020  |            |            |           |           |  | 1 | 10/22/2020 | 4/22/2022  | 80,792,490.01 € | 28,817,039.86 € | 1,004,439.906.99 € |
| ITC32 | 0 | n. 710 del 9 novembre 2020 - n. 745 del 23 febbraio 2021 - n. 839 del 12 gennaio 2022 | 10/2/2020  | 10/3/2020  |            |            |           |           |  | 1 | 10/22/2020 | 4/22/2022  | 80,792,490.01 € | 28,817,039.86 € | 1,004,439.906.99 € |
| ITC20 | 1 | n. 749 del 3 marzo 2021 - n. 839 del 12 gennaio 2022                                  | 10/2/2020  | 10/3/2020  |            |            |           |           |  | 1 | 2/12/2021  | 2/12/2023  | 2,720,000.00 €  | 145,089.18 €    | 268,372.24 €       |
| ITH20 | 1 | n. 757 del 25 marzo 2021                                                              | 10/2/2020  | 10/4/2020  |            |            |           |           |  | 1 | 2/26/2021  | 2/26/2023  | 3,146,500.00 €  | N/A             | N/A                |
| ITC41 | 1 | n. 766 del 9 aprile 2021                                                              | 10/2/2020  | 10/5/2020  |            |            |           |           |  | 1 | 3/19/2021  | 3/19/2023  | 6,834,500.00 €  | 2,315,097.40 €  | 61,131,742.39 €    |
| ITC42 | 1 | n. 766 del 9 aprile 2021                                                              | 10/2/2020  | 10/5/2020  |            |            |           |           |  | 1 | 3/19/2021  | 3/19/2023  | 6,834,500.00 €  | 2,315,097.40 €  | 61,131,742.39 €    |
| ITC44 | 1 | n. 766 del 9 aprile 2021                                                              | 10/2/2020  | 10/5/2020  |            |            |           |           |  | 1 | 3/19/2021  | 3/19/2023  | 6,834,500.00 €  | 2,315,097.40 €  | 61,131,742.39 €    |
| ITC46 | 1 | n. 766 del 9 aprile 2021                                                              | 10/2/2020  | 10/5/2020  |            |            |           |           |  | 1 | 3/19/2021  | 3/19/2023  | 6,834,500.00 €  | 2,315,097.40 €  | 61,131,742.39 €    |
| ITC47 | 1 | n. 766 del 9 aprile 2021                                                              | 10/2/2020  | 10/5/2020  |            |            |           |           |  | 1 | 3/19/2021  | 3/19/2023  | 6,834,500.00 €  | 2,315,097.40 €  | 61,131,742.39 €    |
| ITC48 | 1 | n. 766 del 9 aprile 2021                                                              | 10/2/2020  | 10/5/2020  |            |            |           |           |  | 1 | 3/19/2021  | 3/19/2023  | 6,834,500.00 €  | 2,315,097.40 €  | 61,131,742.39 €    |
| ITC43 | 1 | n. 766 del 9 aprile 2021                                                              | 10/2/2020  | 10/5/2020  |            |            |           |           |  | 1 | 3/19/2021  | 3/19/2023  | 6,834,500.00 €  | 2,315,097.40 €  | 61,131,742.39 €    |
| ITF35 | 1 | n. 748 del 2 marzo 2021 - n. 839 del 12 gennaio 2022                                  | 11/16/2020 | 11/17/2020 | 11/20/2020 | 11/21/2020 | 12/2/2020 | 12/3/2020 |  | 1 | 2/9/2021   | 2/9/2023   | 3,818,500.00 €  | N/A             | 4,206,799.42 €     |
| ITF61 | 1 | n. 767 del 9 aprile 2021                                                              | 11/20/2020 | 11/23/2020 |            |            |           |           |  | 1 | 2/12/2021  | 2/12/2023  | 9,570,000.00 €  | N/A             | N/A                |
| ITF62 | 1 | n. 767 del 9 aprile 2021                                                              | 11/20/2020 | 11/23/2020 |            |            |           |           |  | 1 | 2/12/2021  | 2/12/2023  | 9,570,000.00 €  | N/A             | N/A                |
| ITG2E | 1 | n. 721 del 4 dicembre 2020 - n. 722 del 9 dicembre 2020 - n. 815 del 15 dicembre 2021 | 11/28/2020 | 11/28/2020 |            |            |           |           |  | 1 | 12/2/2020  | 12/2/2022  | 2,000,000.00 €  | N/A             | 34,536,167.17 €    |
| ITH55 | 1 | n. 732 del 31 dicembre 2020 - n. 803 del 28 ottobre 2021 - n. 839 del 12 gennaio 2022 | 12/1/2020  | 12/10/2020 |            |            |           |           |  | 1 | 12/23/2020 | 12/23/2022 | 29,161,231.16 € | 37,288,032.12 € | 159,020,700.56 €   |
| ITH56 | 1 | n. 732 del 31 dicembre 2020 - n. 803 del 28 ottobre 2021 - n. 839 del 12 gennaio 2022 | 12/1/2020  | 12/10/2020 |            |            |           |           |  | 1 | 12/23/2020 | 12/23/2022 | 29,161,231.16 € | 37,288,032.12 € | 159,020,700.56 €   |
| ITH58 | 0 | n. 732 del 31 dicembre 2020 - n. 803 del 28 ottobre 2021 - n. 839 del 12 gennaio 2022 | 12/1/2020  | 12/10/2020 |            |            |           |           |  | 1 | 12/23/2020 | 12/23/2022 | 29,161,231.16 € | 37,288,032.12 € | 159,020,700.56 €   |
| ITH54 | 1 | n. 732 del 31 dicembre 2020 - n. 803 del 28 ottobre 2021 - n. 839 del 12 gennaio 2022 | 12/1/2020  | 12/10/2020 |            |            |           |           |  | 1 | 12/23/2020 | 12/23/2022 | 29,161,231.16 € | 37,288,032.12 € | 159,020,700.56 €   |
| ITH52 | 0 | n. 732 del 31 dicembre 2020 - n. 803 del 28 ottobre 2021 - n. 839 del 12 gennaio 2022 | 12/1/2020  | 12/10/2020 |            |            |           |           |  | 1 | 12/23/2020 | 12/23/2022 | 29,161,231.16 € | 37,288,032.12 € | 159,020,700.56 €   |

|       |   |                                                                                       |           |            |           |           |          |          |  |   |            |            |                 |                 |                  |
|-------|---|---------------------------------------------------------------------------------------|-----------|------------|-----------|-----------|----------|----------|--|---|------------|------------|-----------------|-----------------|------------------|
| ITH51 | 0 | n. 732 del 31 dicembre 2020 - n. 803 del 28 ottobre 2021 - n. 839 del 12 gennaio 2022 | 12/1/2020 | 12/10/2020 |           |           |          |          |  | 1 | 12/23/2020 | 12/23/2022 | 29,161,231.16 € | 37,288,032.12 € | 159,020,700.56 € |
| ITH53 | 1 | n. 732 del 31 dicembre 2020 - n. 803 del 28 ottobre 2021 - n. 839 del 12 gennaio 2022 | 12/1/2020 | 12/10/2020 |           |           |          |          |  | 1 | 12/23/2020 | 12/23/2022 | 29,161,231.16 € | 37,288,032.12 € | 159,020,700.56 € |
| ITH57 | 0 | n. 732 del 31 dicembre 2020 - n. 803 del 28 ottobre 2021 - n. 839 del 12 gennaio 2022 | 12/1/2020 | 12/10/2020 |           |           |          |          |  | 1 | 12/23/2020 | 12/23/2022 | 29,161,231.16 € | 37,288,032.12 € | 159,020,700.56 € |
| ITH59 | 0 | n. 732 del 31 dicembre 2020 - n. 803 del 28 ottobre 2021 - n. 839 del 12 gennaio 2022 | 12/1/2020 | 12/10/2020 |           |           |          |          |  | 1 | 12/23/2020 | 12/23/2022 | 29,161,231.16 € | 37,288,032.12 € | 159,020,700.56 € |
| ITH33 | 1 | n. 761 del 30 marzo 2021                                                              | 12/4/2020 | 12/9/2020  |           |           |          |          |  | 1 | 12/30/2020 | 12/30/2022 | 18,053,000.00 € | N/A             | N/A              |
| ITH36 | 0 | n. 761 del 30 marzo 2021                                                              | 12/4/2020 | 12/9/2020  |           |           |          |          |  | 1 | 12/30/2020 | 12/30/2022 | 18,053,000.00 € | N/A             | N/A              |
| ITH37 | 0 | n. 761 del 30 marzo 2021                                                              | 12/4/2020 | 12/9/2020  |           |           |          |          |  | 1 | 12/30/2020 | 12/30/2022 | 18,053,000.00 € | N/A             | N/A              |
| ITH34 | 0 | n. 761 del 30 marzo 2021                                                              | 12/4/2020 | 12/9/2020  |           |           |          |          |  | 1 | 12/30/2020 | 12/30/2022 | 18,053,000.00 € | N/A             | N/A              |
| ITH35 | 0 | n. 761 del 30 marzo 2021                                                              | 12/4/2020 | 12/9/2020  |           |           |          |          |  | 1 | 12/30/2020 | 12/30/2022 | 18,053,000.00 € | N/A             | N/A              |
| ITH32 | 1 | n. 761 del 30 marzo 2021                                                              | 12/4/2020 | 12/9/2020  |           |           |          |          |  | 1 | 12/30/2020 | 12/30/2022 | 18,053,000.00 € | N/A             | N/A              |
| ITH42 | 1 | n. 783 del 2 luglio 2021                                                              | 12/4/2020 | 12/12/2020 |           |           |          |          |  | 1 | 6/4/2021   | 6/4/2022   | 4,825,000.00 €  | N/A             | N/A              |
| ITH44 | 1 | n. 783 del 2 luglio 2021                                                              | 12/4/2020 | 12/12/2020 |           |           |          |          |  | 1 | 6/4/2021   | 6/4/2022   | 4,825,000.00 €  | N/A             | N/A              |
| ITH41 | 1 | n. 783 del 2 luglio 2021                                                              | 12/4/2020 | 12/12/2020 |           |           |          |          |  | 1 | 6/4/2021   | 6/4/2022   | 4,825,000.00 €  | N/A             | N/A              |
| ITH43 | 0 | n. 783 del 2 luglio 2021                                                              | 12/4/2020 | 12/12/2020 |           |           |          |          |  | 1 | 6/4/2021   | 6/4/2022   | 4,825,000.00 €  | N/A             | N/A              |
| ITC46 | 0 | n. 798 del 23 settembre 2021                                                          | 7/4/2021  | 7/13/2021  | 7/24/2021 | 7/28/2021 | 8/1/2021 | 8/8/2021 |  | 1 | 8/26/2020  | 8/26/2021  | 3,000,000.00 €  | N/A             | N/A              |
| ITC47 | 0 | n. 798 del 23 settembre 2021                                                          | 7/4/2021  | 7/13/2021  | 7/24/2021 | 7/28/2021 | 8/1/2021 | 8/8/2021 |  | 1 | 8/26/2020  | 8/26/2021  | 3,000,000.00 €  | N/A             | N/A              |
| ITC42 | 1 | n. 798 del 23 settembre 2021                                                          | 7/4/2021  | 7/13/2021  | 7/24/2021 | 7/28/2021 | 8/1/2021 | 8/8/2021 |  | 1 | 8/26/2020  | 8/26/2021  | 3,000,000.00 €  | N/A             | N/A              |
| ITC4A | 0 | n. 798 del 23 settembre 2021                                                          | 7/4/2021  | 7/13/2021  | 7/24/2021 | 7/28/2021 | 8/1/2021 | 8/8/2021 |  | 1 | 8/26/2020  | 8/26/2021  | 3,000,000.00 €  | N/A             | N/A              |
| ITC43 | 0 | n. 798 del 23 settembre 2021                                                          | 7/4/2021  | 7/13/2021  | 7/24/2021 | 7/28/2021 | 8/1/2021 | 8/8/2021 |  | 1 | 8/26/2020  | 8/26/2021  | 3,000,000.00 €  | N/A             | N/A              |
| ITC4C | 0 | n. 798 del 23 settembre 2021                                                          | 7/4/2021  | 7/13/2021  | 7/24/2021 | 7/28/2021 | 8/1/2021 | 8/8/2021 |  | 1 | 8/26/2020  | 8/26/2021  | 3,000,000.00 €  | N/A             | N/A              |
| ITC4B | 0 | n. 798 del 23 settembre 2021                                                          | 7/4/2021  | 7/13/2021  | 7/24/2021 | 7/28/2021 | 8/1/2021 | 8/8/2021 |  | 1 | 8/26/2020  | 8/26/2021  | 3,000,000.00 €  | N/A             | N/A              |
| ITC4D | 0 | n. 798 del 23 settembre 2021                                                          | 7/4/2021  | 7/13/2021  | 7/24/2021 | 7/28/2021 | 8/1/2021 | 8/8/2021 |  | 1 | 8/26/2020  | 8/26/2021  | 3,000,000.00 €  | N/A             | N/A              |
| ITC48 | 0 | n. 798 del 23 settembre 2021                                                          | 7/4/2021  | 7/13/2021  | 7/24/2021 | 7/28/2021 | 8/1/2021 | 8/8/2021 |  | 1 | 8/26/2020  | 8/26/2021  | 3,000,000.00 €  | N/A             | N/A              |
| ITC44 | 1 | n. 798 del 23 settembre 2021                                                          | 7/4/2021  | 7/13/2021  | 7/24/2021 | 7/28/2021 | 8/1/2021 | 8/8/2021 |  | 1 | 8/26/2020  | 8/26/2021  | 3,000,000.00 €  | N/A             | N/A              |
| ITC41 | 1 | n. 798 del 23 settembre 2021                                                          | 7/4/2021  | 7/13/2021  | 7/24/2021 | 7/28/2021 | 8/1/2021 | 8/8/2021 |  | 1 | 8/26/2020  | 8/26/2021  | 3,000,000.00 €  | N/A             | N/A              |
| ITC33 | 1 | n. 848 del 21 gennaio 2022                                                            | 10/3/2021 | 10/5/2021  |           |           |          |          |  | 1 | 12/23/2021 | 12/23/2022 | 6,000,000.00 €  | N/A             | N/A              |
| ITC32 | 1 | n. 848 del 21 gennaio 2022                                                            | 10/3/2021 | 10/5/2021  |           |           |          |          |  | 1 | 12/23/2021 | 12/23/2022 | 6,000,000.00 €  | N/A             | N/A              |

|       |   |                                                                                                                    |           |           |            |            |            |            |           |            |   |            |            |                |     |     |
|-------|---|--------------------------------------------------------------------------------------------------------------------|-----------|-----------|------------|------------|------------|------------|-----------|------------|---|------------|------------|----------------|-----|-----|
| ITC18 | 1 | n. 846 del 17 gennaio 2022                                                                                         | 10/3/2021 | 10/4/2021 |            |            |            |            |           |            | 1 | 12/23/2021 | 12/23/2022 | 1,900,000.00 € | N/A | N/A |
| ITC17 | 0 | n. 846 del 17 gennaio 2022                                                                                         | 10/3/2021 | 10/4/2021 |            |            |            |            |           |            | 1 | 12/23/2021 | 12/23/2022 | 1,900,000.00 € | N/A | N/A |
| ITG14 | 1 | n. 853 del 24 gennaio 2022                                                                                         | 10/5/2021 | 10/5/2021 | 10/13/2021 | 10/14/2021 | 10/22/2021 | 10/31/2021 | 11/8/2021 | 11/17/2021 | 1 | 12/29/2021 | 12/29/2022 | 6,000,000.00 € | N/A | N/A |
| ITG15 | 0 | n. 853 del 24 gennaio 2022                                                                                         | 10/5/2021 | 10/5/2021 | 10/13/2021 | 10/14/2021 | 10/22/2021 | 10/31/2021 | 11/8/2021 | 11/17/2021 | 1 | 12/29/2021 | 12/29/2022 | 6,000,000.00 € | N/A | N/A |
| ITG17 | 1 | n. 853 del 24 gennaio 2022                                                                                         | 10/5/2021 | 10/5/2021 | 10/13/2021 | 10/14/2021 | 10/22/2021 | 10/31/2021 | 11/8/2021 | 11/17/2021 | 1 | 12/29/2021 | 12/29/2022 | 6,000,000.00 € | N/A | N/A |
| ITG16 | 1 | n. 853 del 24 gennaio 2022                                                                                         | 10/5/2021 | 10/5/2021 | 10/13/2021 | 10/14/2021 | 10/22/2021 | 10/31/2021 | 11/8/2021 | 11/17/2021 | 1 | 12/29/2021 | 12/29/2022 | 6,000,000.00 € | N/A | N/A |
| ITG13 | 1 | n. 853 del 24 gennaio 2022                                                                                         | 10/5/2021 | 10/5/2021 | 10/13/2021 | 10/14/2021 | 10/22/2021 | 10/31/2021 | 11/8/2021 | 11/17/2021 | 1 | 12/29/2021 | 12/29/2022 | 6,000,000.00 € | N/A | N/A |
| ITG12 | 1 | n. 853 del 24 gennaio 2022                                                                                         | 10/5/2021 | 10/5/2021 | 10/13/2021 | 10/14/2021 | 10/22/2021 | 10/31/2021 | 11/8/2021 | 11/17/2021 | 1 | 12/29/2021 | 12/29/2022 | 6,000,000.00 € | N/A | N/A |
| ITG18 | 1 | n. 853 del 24 gennaio 2022                                                                                         | 10/5/2021 | 10/5/2021 | 10/13/2021 | 10/14/2021 | 10/22/2021 | 10/31/2021 | 11/8/2021 | 11/17/2021 | 1 | 12/29/2021 | 12/29/2022 | 6,000,000.00 € | N/A | N/A |
| ITG19 | 1 | n. 853 del 24 gennaio 2022                                                                                         | 10/5/2021 | 10/5/2021 | 10/13/2021 | 10/14/2021 | 10/22/2021 | 10/31/2021 | 11/8/2021 | 11/17/2021 | 1 | 12/29/2021 | 12/29/2022 | 6,000,000.00 € | N/A | N/A |
| ITG11 | 1 | n. 853 del 24 gennaio 2022                                                                                         | 10/5/2021 | 10/5/2021 | 10/13/2021 | 10/14/2021 | 10/22/2021 | 10/31/2021 | 11/8/2021 | 11/17/2021 | 1 | 12/29/2021 | 12/29/2022 | 6,000,000.00 € | N/A | N/A |
| ITC47 | 1 | n. 929 del 6 ottobre 2022                                                                                          | 7/27/2022 | 7/28/2022 |            |            |            |            |           |            | 1 | 9/8/2022   | 9/8/2023   | 3,250,000 €    | N/A | N/A |
| ITF34 | 1 | n. 928 del 5 ottobre 2022                                                                                          | 8/9/2022  | 8/9/2022  |            |            |            |            |           |            | 1 | 9/28/2022  | 9/28/2023  | 1,150,000 €    | N/A | N/A |
| ITG13 | 1 | n. 925 del 20 settembre 2022                                                                                       | 8/12/2022 | 8/12/2022 |            |            |            |            |           |            | 1 | 9/1/2022   | 9/1/2023   | 1,000,000 €    | N/A | N/A |
| ITH54 | 1 | n. 940 del 31 ottobre 2022                                                                                         | 8/17/2022 | 8/19/2022 |            |            |            |            |           |            | 1 | 11/5/2022  | 11/5/2023  | 7,800,000 €    | N/A | N/A |
| ITH56 | 1 | n. 940 del 31 ottobre 2022                                                                                         | 8/17/2022 | 8/19/2022 |            |            |            |            |           |            | 1 | 11/5/2022  | 11/5/2023  | 7,800,000 €    | N/A | N/A |
| ITH52 | 1 | n. 940 del 31 ottobre 2022                                                                                         | 8/17/2022 | 8/19/2022 |            |            |            |            |           |            | 1 | 11/5/2022  | 11/5/2023  | 7,800,000 €    | N/A | N/A |
| ITH55 | 0 | n. 940 del 31 ottobre 2022                                                                                         | 8/17/2022 | 8/19/2022 |            |            |            |            |           |            | 1 | 11/5/2022  | 11/5/2023  | 7,800,000 €    | N/A | N/A |
| ITH53 | 0 | n. 940 del 31 ottobre 2022                                                                                         | 8/17/2022 | 8/19/2022 |            |            |            |            |           |            | 1 | 11/5/2022  | 11/5/2023  | 7,800,000 €    | N/A | N/A |
| ITH58 | 0 | n. 940 del 31 ottobre 2022                                                                                         | 8/17/2022 | 8/19/2022 |            |            |            |            |           |            | 1 | 11/5/2022  | 11/5/2023  | 7,800,000 €    | N/A | N/A |
| ITH59 | 0 | n. 940 del 31 ottobre 2022                                                                                         | 8/17/2022 | 8/19/2022 |            |            |            |            |           |            | 1 | 11/5/2022  | 11/5/2023  | 7,800,000 €    | N/A | N/A |
| ITI11 | 1 | n. 939 del 25 ottobre 2022                                                                                         | 8/18/2022 | 8/18/2022 |            |            |            |            |           |            | 1 | 10/10/2022 | 10/10/2023 | 2,470,000.00 € | N/A | N/A |
| ITI31 | 1 | n. 922 del 17 settembre 2022, n. 924 del 20 settembre 2022, n. 930 del 12 ottobre 2022, n. 935 del 14 ottobre 2023 | 9/15/2022 | 9/15/2022 |            |            |            |            |           |            | 1 | 9/16/2022  | 9/16/2023  | 6,100,000.00 € | N/A | N/A |
| ITI32 | 1 | n. 922 del 17 settembre 2022, n. 924 del 20 settembre 2022, n. 930 del 12 ottobre 2022, n. 935 del 14 ottobre 2023 | 9/15/2022 | 9/15/2022 |            |            |            |            |           |            | 1 | 9/16/2022  | 9/16/2023  | 6,100,000.00 € | N/A | N/A |
| ITI21 | 1 | n. 946 del 17 novembre 2022                                                                                        | 9/15/2022 | 9/15/2022 |            |            |            |            |           |            | 1 | 11/4/2022  | 11/4/2023  | 600,000 €      | N/A | N/A |
| ITG14 | 0 | n. 976 del 22 marzo 2023                                                                                           | 22/11/22  | 27/11/22  | 03/12/22   | 03/12/22   |            |            |           |            | 1 | 2/23/2023  | 2/23/2024  | 3,700,000.00 € | N/A | N/A |
| ITG15 | 0 | n. 976 del 22 marzo 2023                                                                                           | 22/11/22  | 27/11/22  | 03/12/22   | 03/12/22   |            |            |           |            | 1 | 2/23/2023  | 2/23/2024  | 3,700,000.00 € | N/A | N/A |
| ITG17 | 0 | n. 976 del 22 marzo 2023                                                                                           | 22/11/22  | 27/11/22  | 03/12/22   | 03/12/22   |            |            |           |            | 1 | 2/23/2023  | 2/23/2024  | 3,700,000.00 € | N/A | N/A |
| ITG13 | 1 | n. 976 del 22 marzo 2023                                                                                           | 22/11/22  | 27/11/22  | 03/12/22   | 03/12/22   |            |            |           |            | 1 | 2/23/2023  | 2/23/2024  | 3,700,000.00 € | N/A | N/A |
| ITG12 | 0 | n. 976 del 22 marzo 2023                                                                                           | 22/11/22  | 27/11/22  | 03/12/22   | 03/12/22   |            |            |           |            | 1 | 2/23/2023  | 2/23/2024  | 3,700,000.00 € | N/A | N/A |
| ITG18 | 0 | n. 976 del 22 marzo 2023                                                                                           | 22/11/22  | 27/11/22  | 03/12/22   | 03/12/22   |            |            |           |            | 1 | 2/23/2023  | 2/23/2024  | 3,700,000.00 € | N/A | N/A |

|       |   |                                                                                                                    |            |            |          |          |   |            |            |                 |     |     |
|-------|---|--------------------------------------------------------------------------------------------------------------------|------------|------------|----------|----------|---|------------|------------|-----------------|-----|-----|
| ITG19 | 0 | n. 976 del 22 marzo 2023                                                                                           | 22/11/22   | 27/11/22   | 03/12/22 | 03/12/22 | 1 | 2/23/2023  | 2/23/2024  | 3,700,000.00 €  | N/A | N/A |
| ITH56 | 1 | n. 966 del 15 febbraio 2023                                                                                        | 22/11/22   | 05/12/23   |          |          | 2 | 2/2/2023   | 2/2/2024   | 16,173,000.00 € | N/A | N/A |
| ITH58 | 1 | n. 966 del 15 febbraio 2023                                                                                        | 22/11/22   | 05/12/23   |          |          | 2 | 2/2/2023   | 2/2/2024   | 16,173,000.00 € | N/A | N/A |
| ITH57 | 1 | n. 966 del 15 febbraio 2023                                                                                        | 22/11/22   | 05/12/23   |          |          | 2 | 2/2/2023   | 2/2/2024   | 16,173,000.00 € | N/A | N/A |
| ITF33 | 1 | n. 948 del 30 novembre 2022, n. 951 dell'11 dicembre 2022, n. 954 del 24 dicembre 2022, n. 963 del 9 febbraio 2024 | 11/26/2022 | 11/26/2022 |          |          | 1 | 11/27/2022 | 11/27/2023 | 2,000,000.00 €  | N/A | N/A |
| ITF51 | 1 | n. 977 del 23 marzo 2023                                                                                           | 11/30/2012 | 11/30/2012 |          |          | 1 | 2/23/2023  | 2/23/2024  | 1,030,000.00 €  | N/A | N/A |
